# Supplementary material for: A rationally designed perfluorinated host for the extraction of PFOA from water utilising non-covalent interactions
Source: Royal Society of Chemistry journal article supplement (doi:10.1039/c7nj03026f), 2017-11-15
Supplement: c7nj03026f1.pdf [file c7nj03026f1.pdf]

## Electronic Supporting Information

# A rationally designed perfluorinated host for the extraction of PFOA from water utilising non- covalent interactions

*Harrison Omorodion,<sup>a</sup> Miguel Palenzuela,<sup>a</sup> Manuel Ruether,<sup>a</sup> Brendan Twamley,<sup>a</sup> James A. Platts<sup>b</sup> and Robert J. Baker<sup>\*a</sup>*

<sup>a</sup> School of Chemistry, University of Dublin, Trinity College, Dublin 2, Ireland

<sup>b</sup> School of Chemistry, Main Building, Cardiff University, Park Place, Cardiff, CF10 3AT, U. K.

|                                                                             |    |
|-----------------------------------------------------------------------------|----|
| <b>Characterization data for host 5</b> .....                               | 2  |
| <b>Characterization data for host 6</b> .....                               | 5  |
| <b>Characterisation data for host 8</b> .....                               | 8  |
| <b>NMR spectroscopic data for commercial PFOA used in this study.</b> ..... | 11 |
| <b>Hirshfeld Surface analysis</b> .....                                     | 14 |
| <b>Thermal characterization of hosts and host:guest complexes</b> .....     | 16 |
| <b><sup>1</sup>H and <sup>19</sup>F NMR titration experiments</b> .....     | 23 |
| <b><sup>19</sup>F DOSY spectroscopy</b> .....                               | 38 |
| <b>Solid-State NMR spectroscopy of hosts and host:guest complexes</b> ..... | 40 |
| <b>Computational Chemistry</b> .....                                        | 68 |

## Characterization data for host 5.

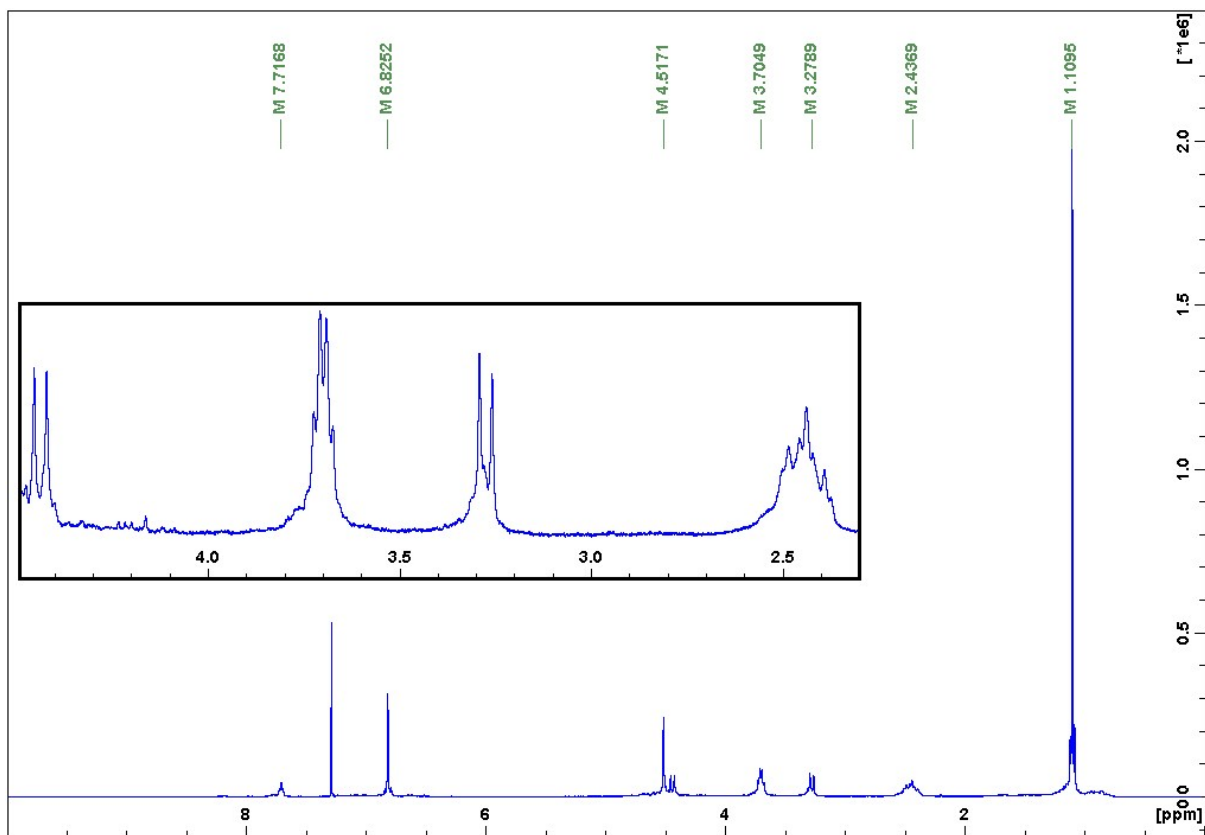

Figure S1.  $^1\text{H}$  NMR spectrum of **5** in  $\text{CDCl}_3$ .

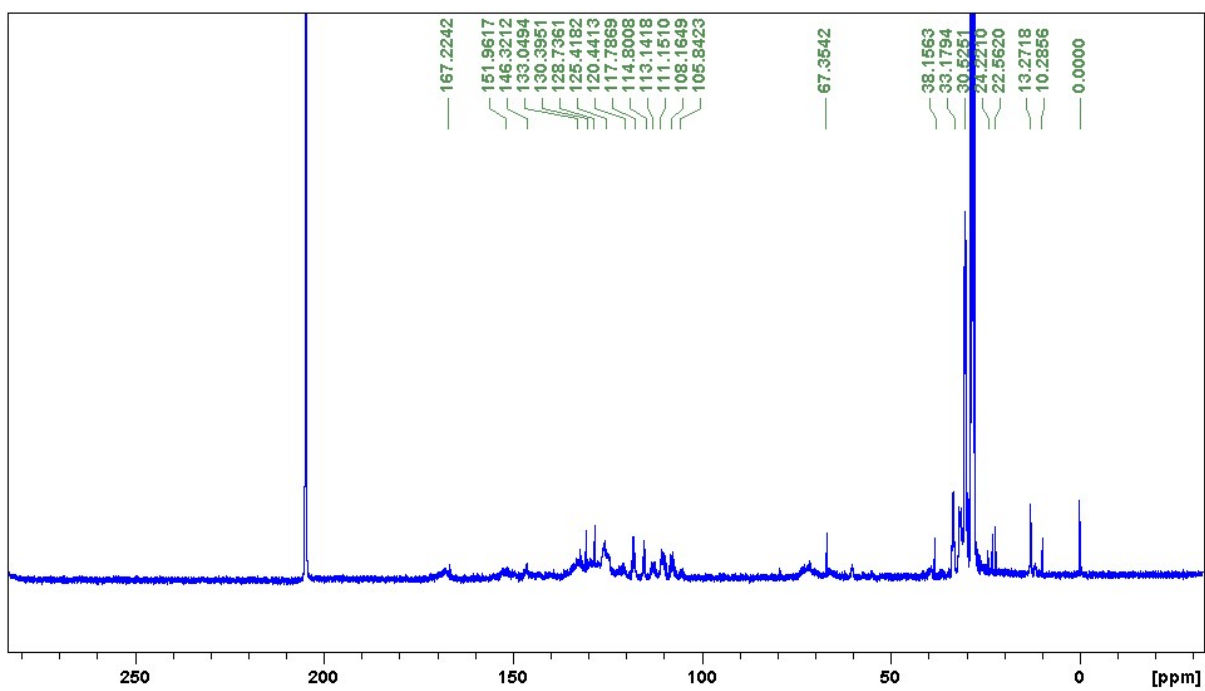

Figure S2.  $^{13}\text{C}\{^1\text{H}\}$  NMR spectrum of **5** in  $\text{CDCl}_3$ .

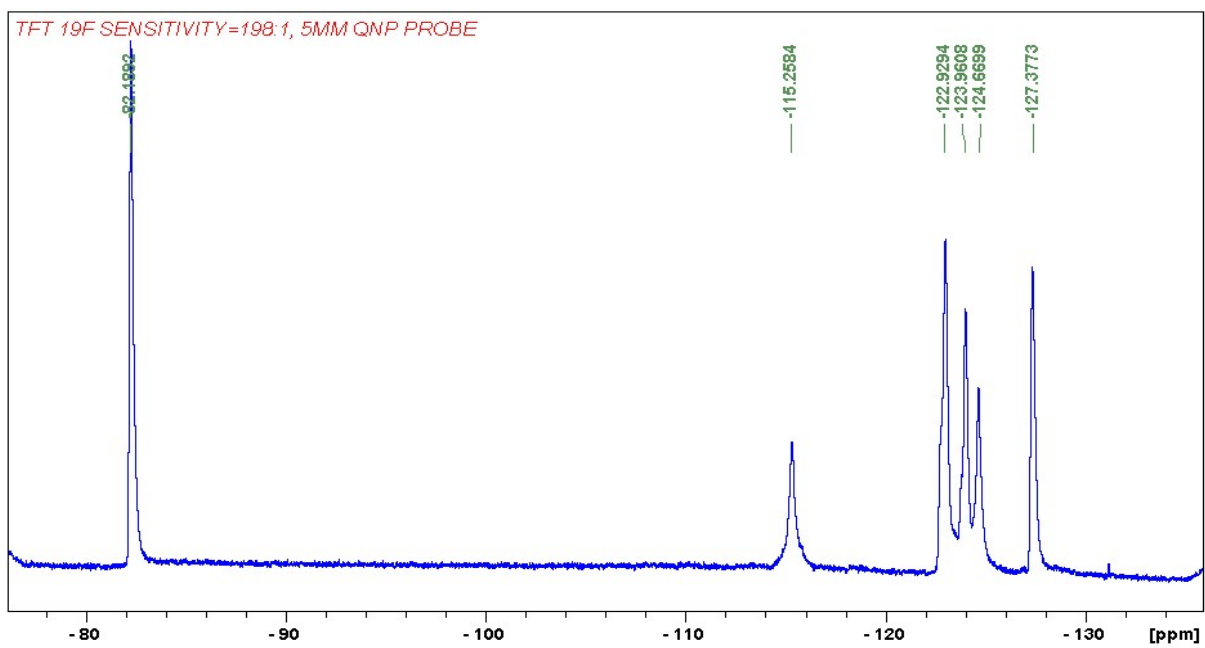

**Figure S3.**  $^{19}\text{F}$  NMR spectrum of **5** in  $\text{CDCl}_3$ .

Single Mass Analysis

Tolerance = 5.0 PPM / DBE: min = -1.5, max = 500.0

Element prediction: Off

Number of isotope peaks used for i-FIT = 3

Monoisotopic Mass, Odd and Even Electron Ions

4674 formula(e) evaluated with 1 results within limits (up to 10 closest results for each mass)

Elements Used:

C: 0-84 H: 0-80 N: 0-4 O: 0-8 F: 0-52 Na: 0-1

Harrison Omorodion (BB), HO\_15N\_C2

Q-TOF20160616MFD05 91 (1.883) AM (Cen,4, 80.00, Ar,10000.0,1570.68,0.70); Sm (SG, 1x5.00); Sb (15,10.00); Cm (19:105-90:92)

TOF MS LD+  
6.20e+004

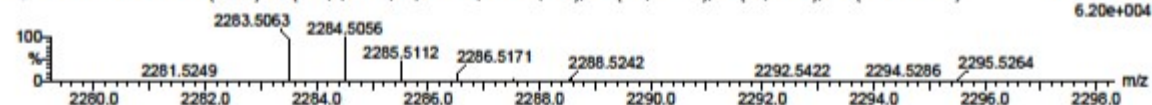

Minimum: 5.0 5.0 -1.5  
Maximum: 5.0 5.0 500.0

| Mass      | Calc. Mass | mDa | PPM | DBE  | i-FIT | i-FIT (Norm) | Formula              |
|-----------|------------|-----|-----|------|-------|--------------|----------------------|
| 2283.5063 | 2283.5044  | 1.9 | 0.8 | 20.5 | 41.6  | 0.0          | C84 H80 N4 O8 F52 Na |

Harrison Omorodion (BB), HO\_15N\_C2

Q-TOF20160616MFD05 91 (1.883) AM (Cen,4, 80.00, Ar,10000.0,1570.68,0.70); Sm (SG, 1x5.00); Sb (15,10.00); Cm (19:105-90:92)

TOF MS LD+  
6.20e4

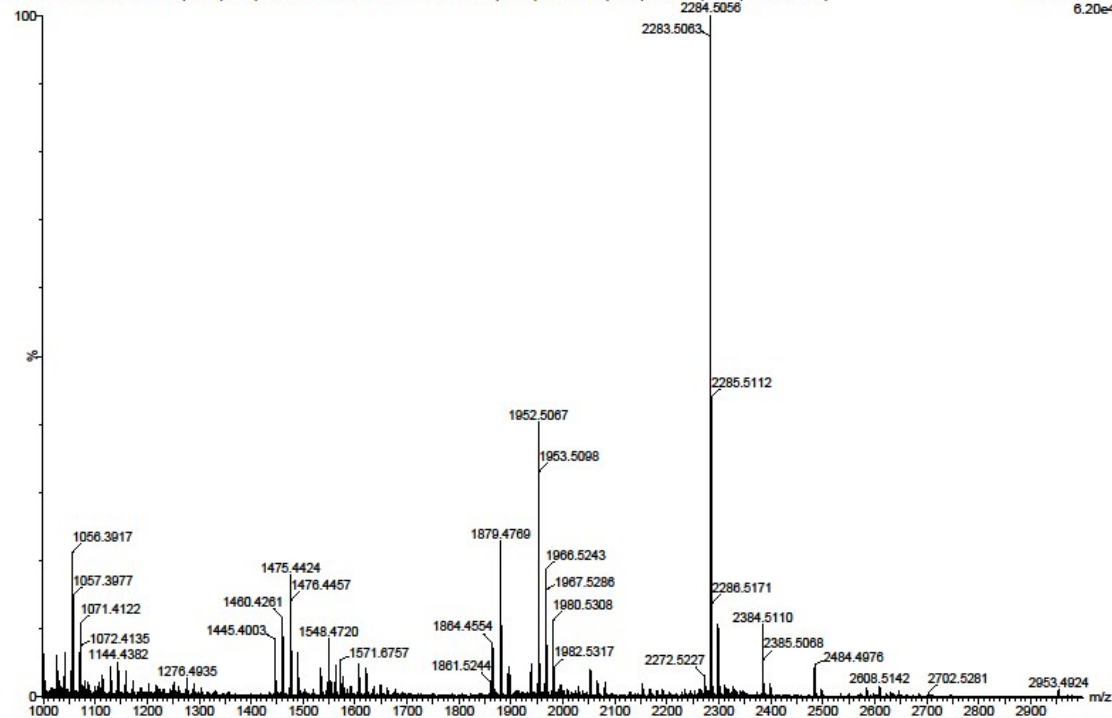

Figure S4. Mass spectrometry and HRMS data for 5.

## Characterization data for host 6

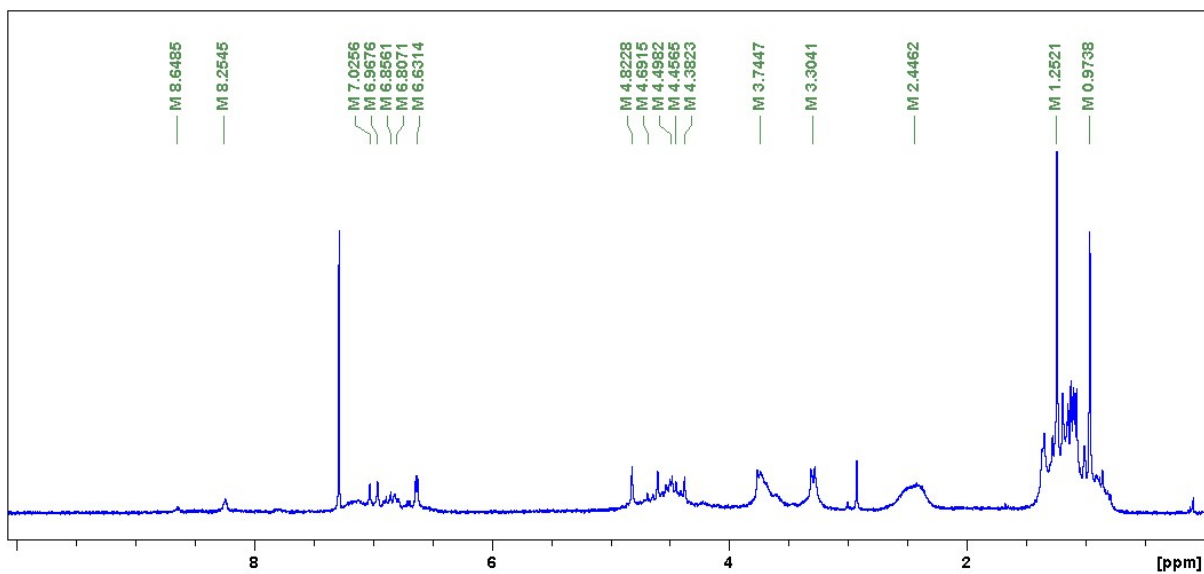

**Figure S5.**  $^1\text{H}$  NMR spectrum of **6** in  $\text{CDCl}_3$ .

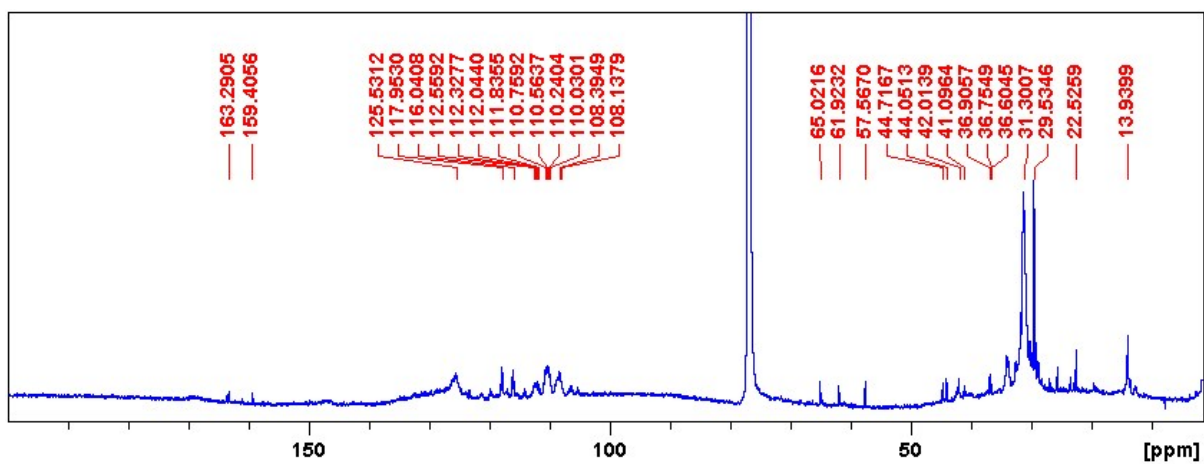

**Figure S6.**  $^{13}\text{C}\{^1\text{H}\}$  NMR spectrum of **6** in  $\text{CDCl}_3$ .

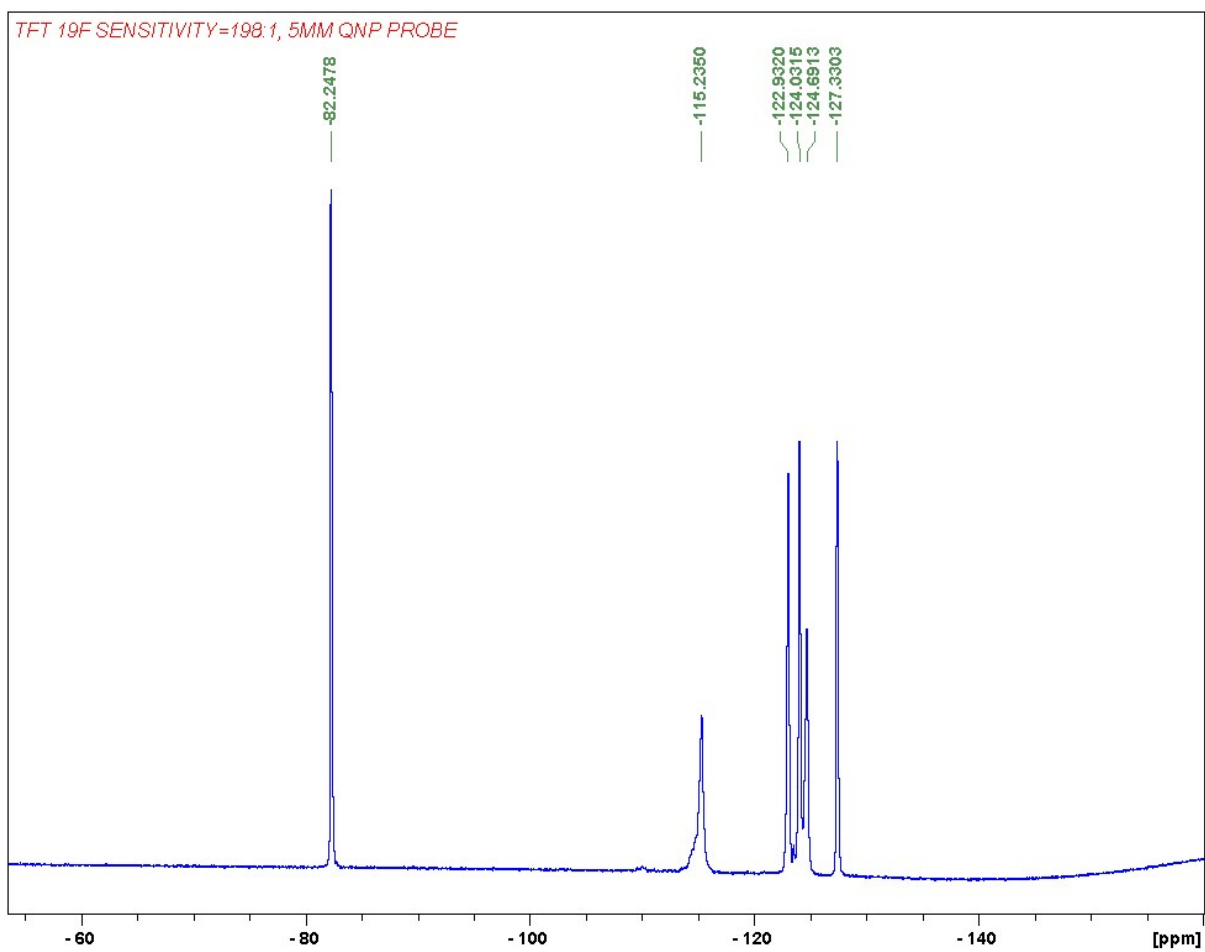

**Figure S7.**  $^{19}\text{F}$  NMR spectrum of **6** in  $\text{CDCl}_3$ .

Single Mass Analysis

Tolerance = 100.0 PPM / DBE: min = -1.5, max = 1000.0

Element prediction: Off

Number of isotope peaks used for i-FIT = 3

Monoisotopic Mass, Odd and Even Electron Ions

4674 formula(e) evaluated with 1 results within limits (up to 10 closest results for each mass)

Elements Used:

C: 0-84 H: 0-80 N: 0-4 O: 0-8 F: 0-52 Na: 0-1

Harrison Omorodion (BB), HO-15XXA in DCTB 3.37e+001  
 Q-TOF20140730MF005 77 (1.421) AM (Cen,4, 80.00, Ht,10000.0,1570.68,0.70); Sm (SG, 1x3.00); Sb (15,10.00); Sn (SG, 5x3.00); Cm (5:127-42:100)

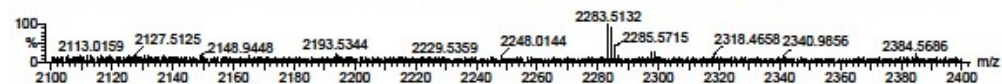

Minimum: -1.5  
 Maximum: 5.0 100.0 1000.0

| Mass      | Calc. Mass | mDa | PPM | DBE  | i-FIT | i-FIT (Norm) | Formula              |
|-----------|------------|-----|-----|------|-------|--------------|----------------------|
| 2283.5132 | 2283.5044  | 8.8 | 3.9 | 20.5 | 34.4  | 0.0          | C84 H80 N4 O8 F52 Na |

Harrison Omorodion (BB), HO 15XXA in DCTB  
 Q-TOF20140730MF005 77 (1.421) AM (Cen,4, 80.00, Ht,10000.0,1570.68,0.70); Sm (SG, 1x3.00); Sb (15,10.00); Sn (SG, 5x3.00); Cm (5:127-42:100) TOF MS LD+ 33.7

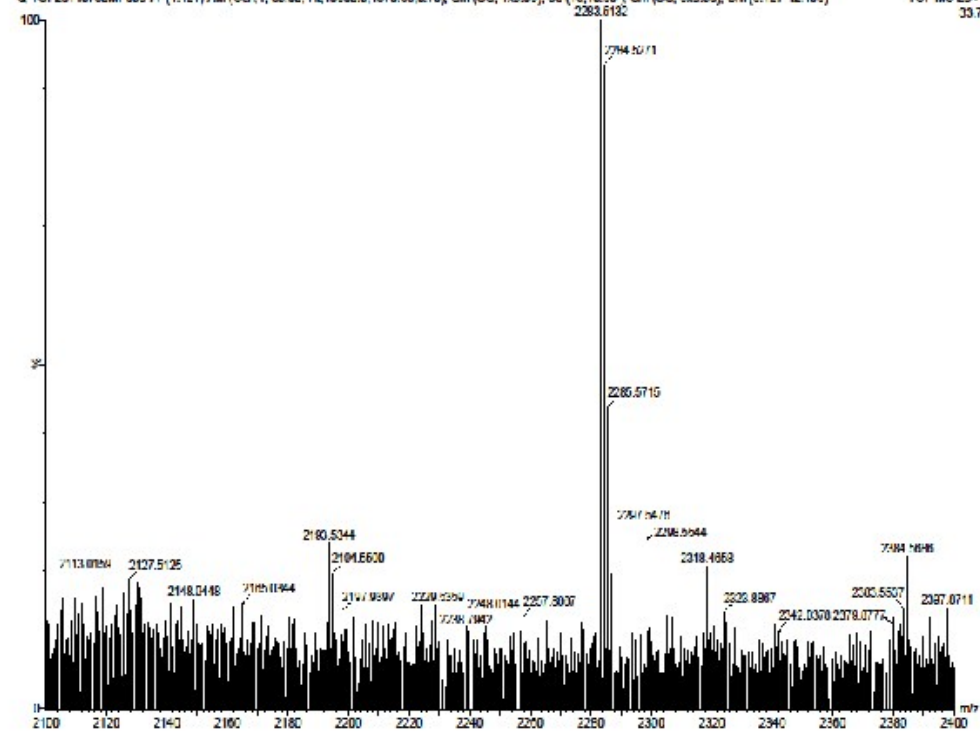

Figure S8. Mass spectrometry and HRMS data for 6.

## Characterisation data for host **8**

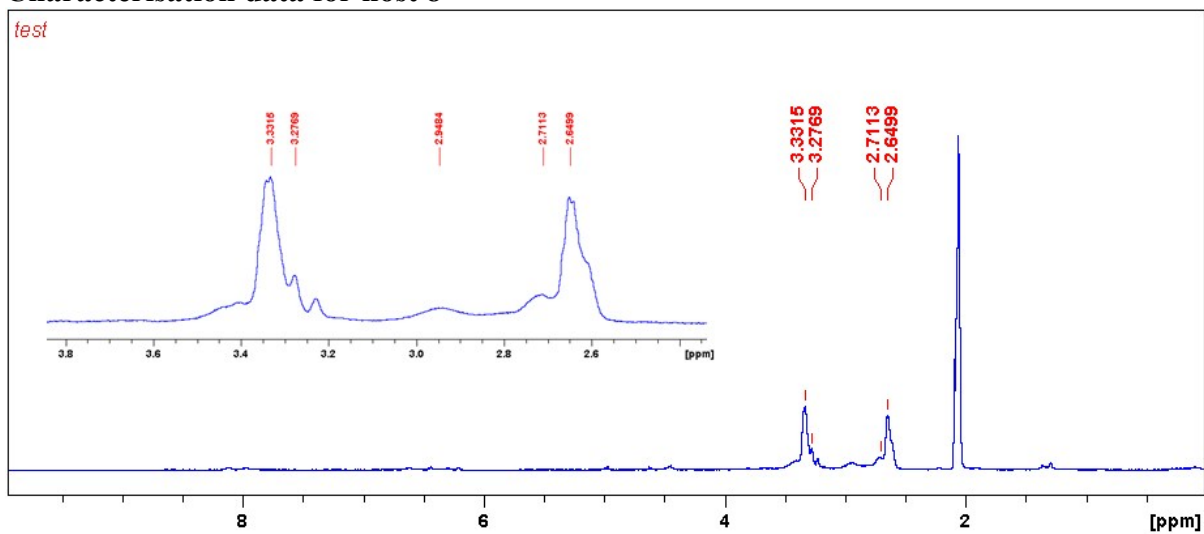

Figure S9.  $^1\text{H}$  NMR spectrum of **8** in  $\text{CDCl}_3$ .

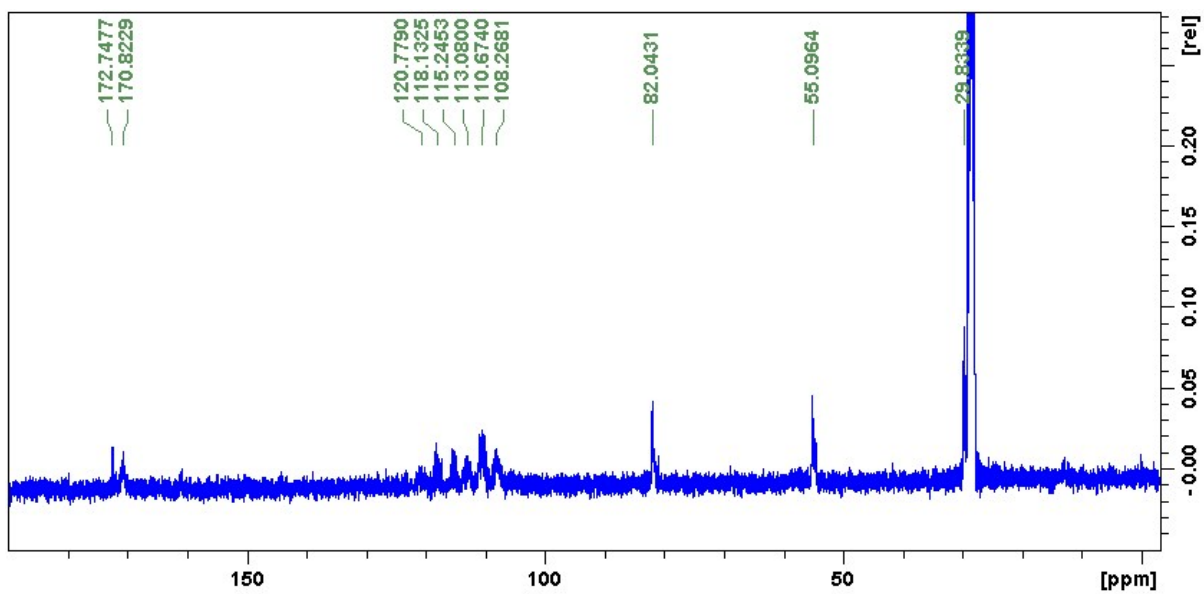

Figure S10.  $^{13}\text{C}\{^1\text{H}\}$  NMR spectrum of **8** in  $\text{CDCl}_3$ .



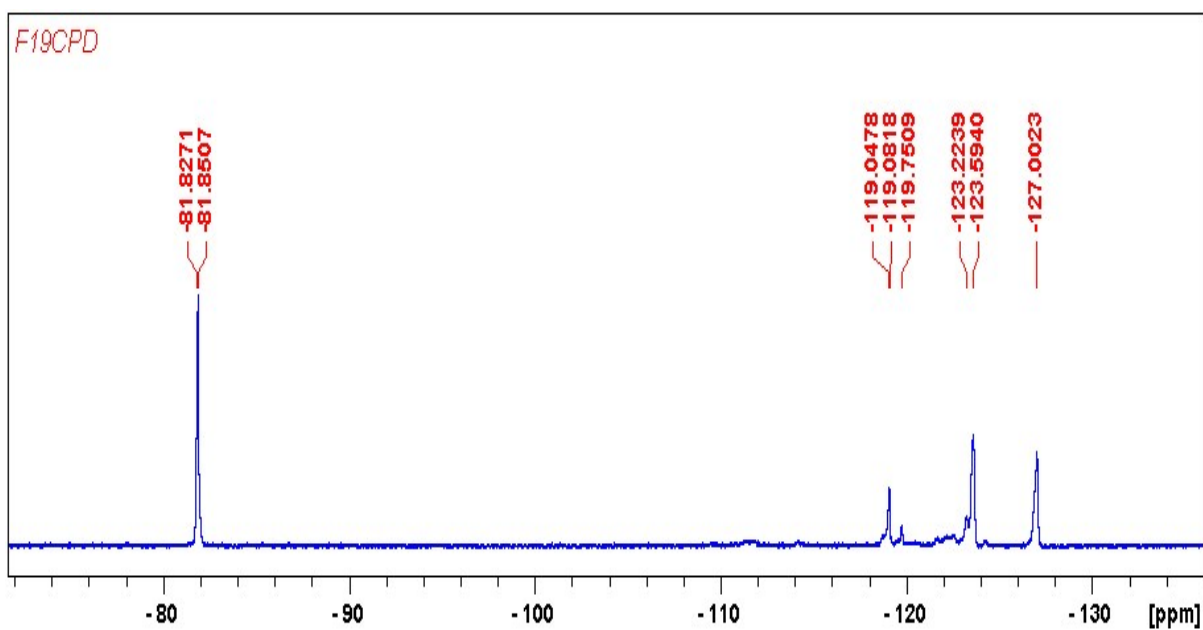

Figure S11.  $^{19}\text{F}$  NMR spectrum of **8** in  $\text{CDCl}_3$ .

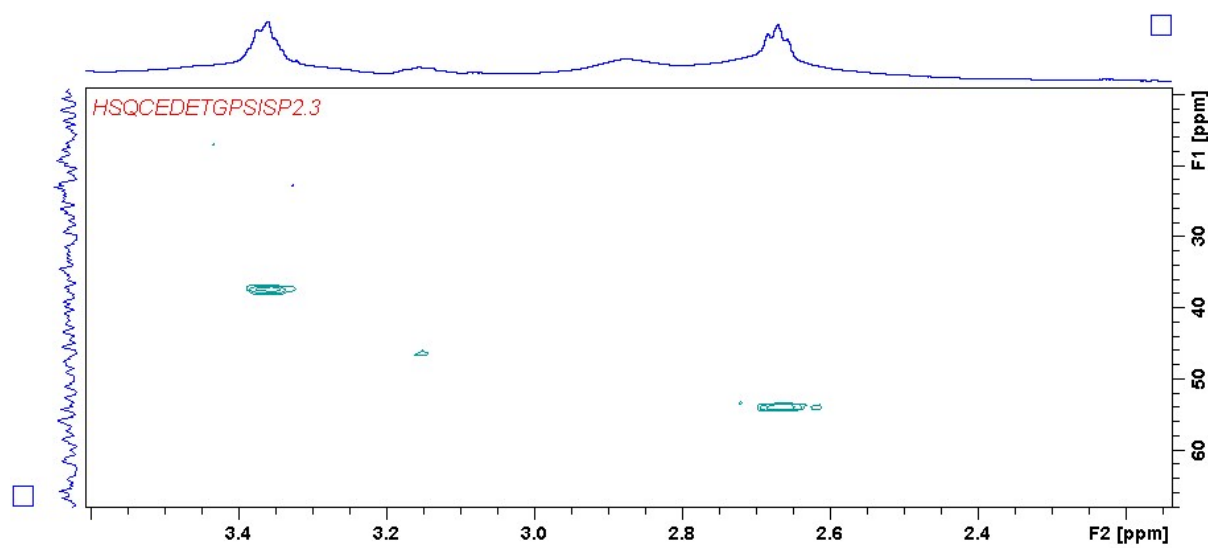

Figure S12. HSQC NMR spectrum of **8** in  $\text{CDCl}_3$ .

Single Mass Analysis

Tolerance = 2.0 PPM / DBE: min = -1.5, max = 500.0

Element prediction: Off

Number of isotope peaks used for i-FIT = 3

Monoisotopic Mass, Odd and Even Electron Ions

789 formula(e) evaluated with 1 results within limits (up to 50 best isotopic matches for each mass)

Elements Used:

C: 0-30 H: 0-22 N: 0-4 O: 0-3 F: 0-30

Harrison Omorodion (BB), HO-SC-3 in DCTB

Q-TOF20140714MF002 81 (1.817) AM (Cen,4, 80.00, Ht,10000.0,1570.68,0.70); Sm (SG, 1x5.00); Sb (15,10.00); Cm (15:91-80:82)

TOF MS LD+  
1.62e+002

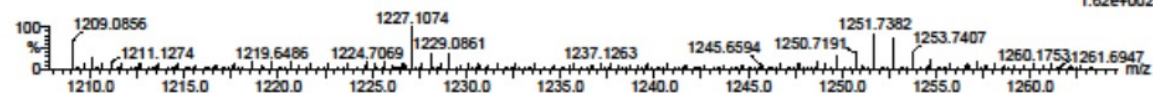

Minimum: -1.5  
Maximum: 5.0 2.0 500.0

| Mass      | Calc. Mass | mDa | PPM | DBE | i-FIT | i-FIT (Norm) | Formula           |
|-----------|------------|-----|-----|-----|-------|--------------|-------------------|
| 1227.1074 | 1227.1069  | 0.5 | 0.4 | 2.5 | 53.9  | 0.0          | C30 H22 N4 O3 F39 |

Harrison Omorodion (BB), HO-SC-3 in DCTB

Q-TOF20140714MF002 (0.018) Is (1.00,0.50) C30H21F39N4O3H

TOF MS LD+  
7.00e12

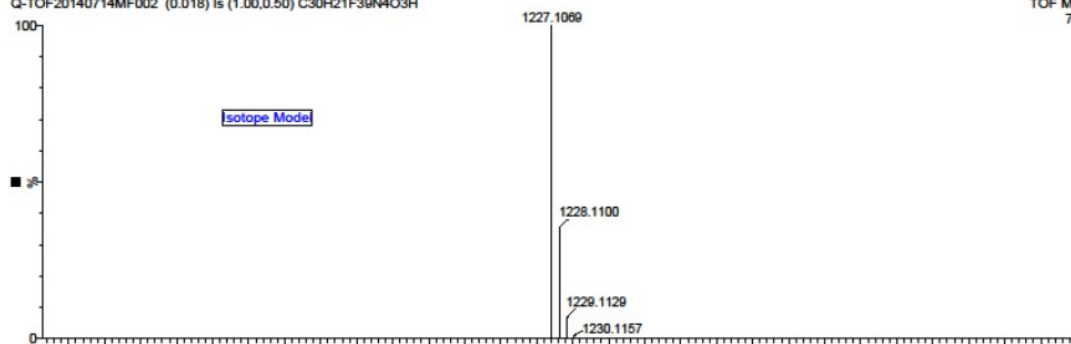

Q-TOF20140714MF002 81 (1.817) AM (Cen,4, 80.00, Ht,10000.0,1570.68,0.70); Sm (SG, 1x5.00); Sb (15,10.00); Cm (15:91-80:82)

TOF MS LD+  
1.16e3

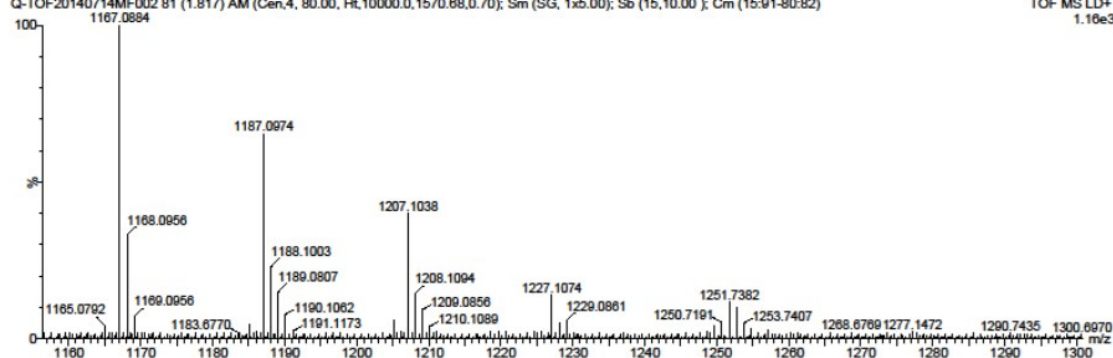

Figure S13. Mass spectrometry and HRMS data for 8.

NMR spectroscopic data for commercial PFOA used in this study.

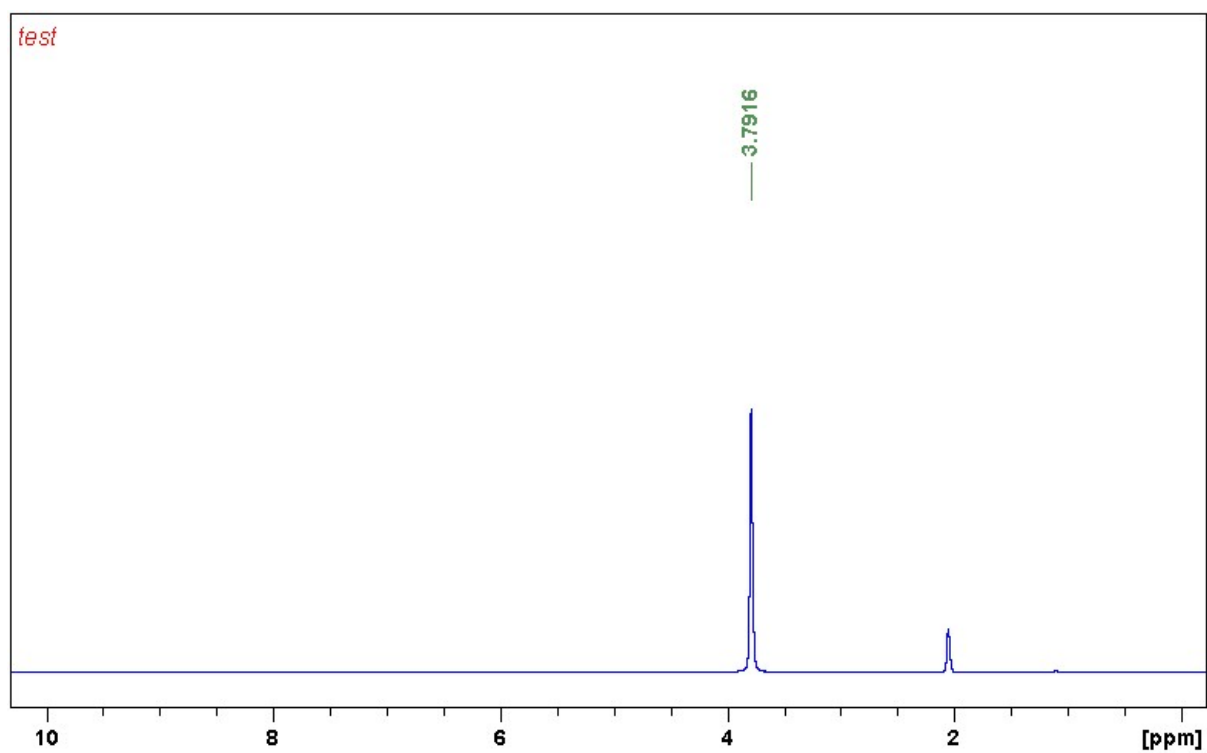

**Figure S14.** <sup>1</sup>H NMR spectrum of **PFOA** in CDCl<sub>3</sub>.

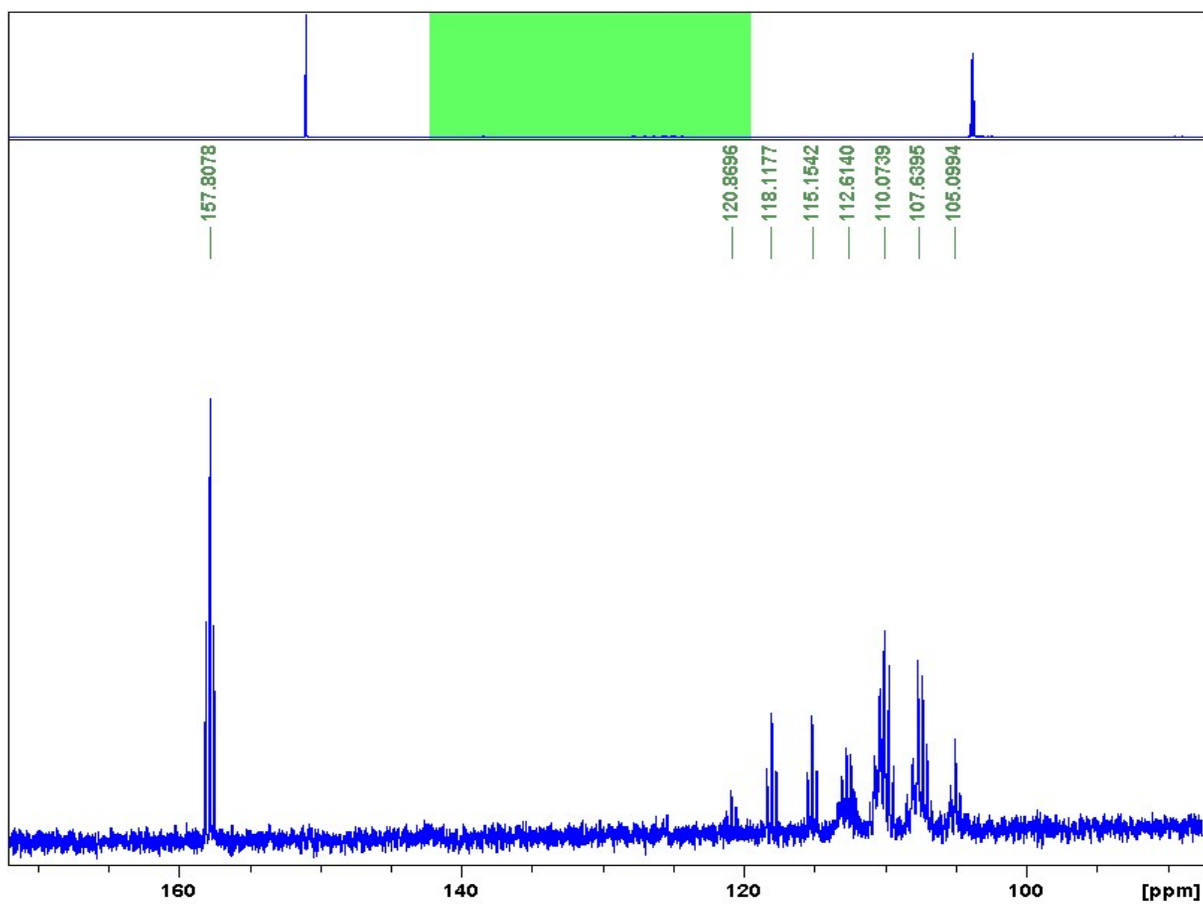

**Figure S15.**  $^{13}\text{C}\{^1\text{H}\}$  NMR spectrum of PFOA in  $\text{CDCl}_3$ .

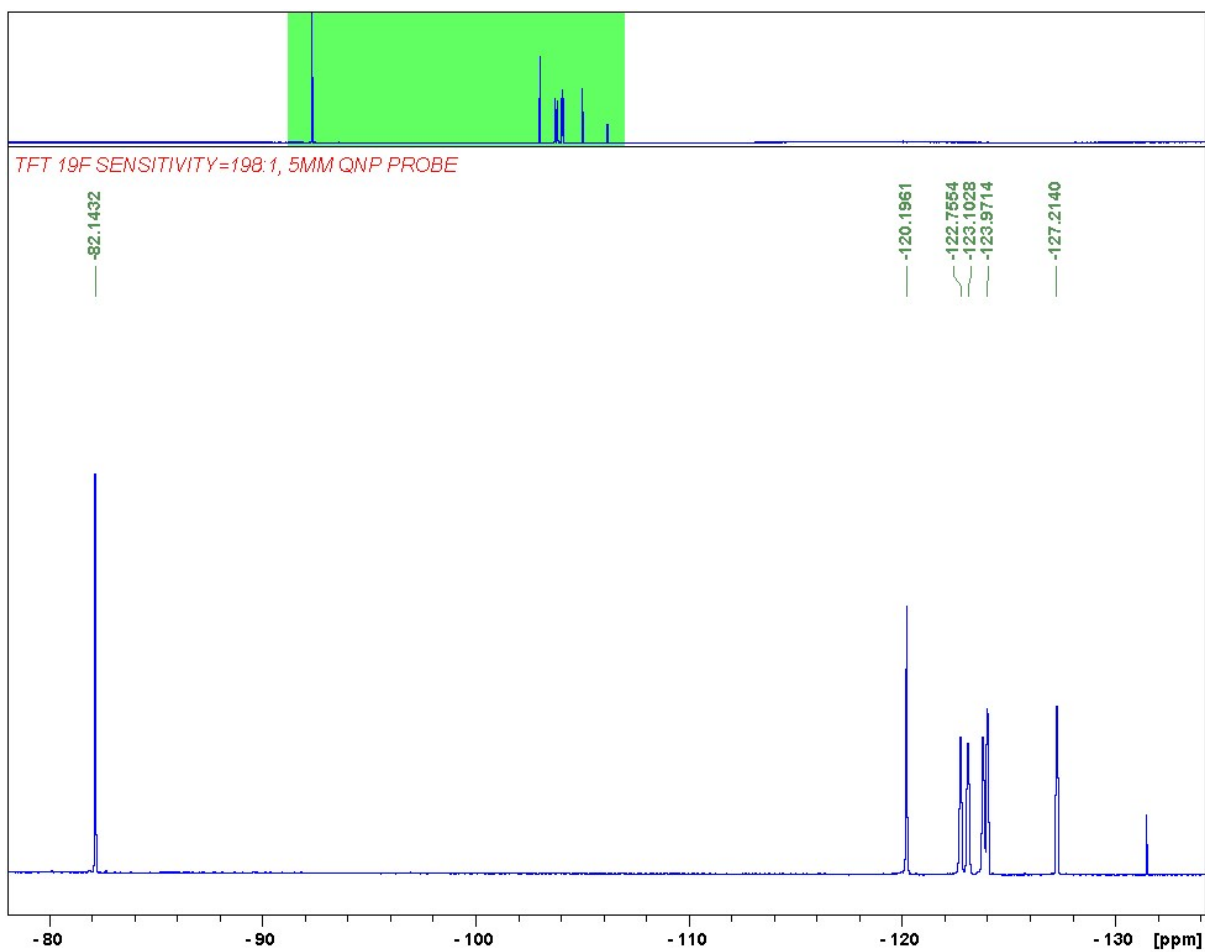

**Figure S16.**  $^{19}\text{F}$  NMR spectrum of PFOA in  $\text{CDCl}_3$ .

## Hirshfeld Surface analysis

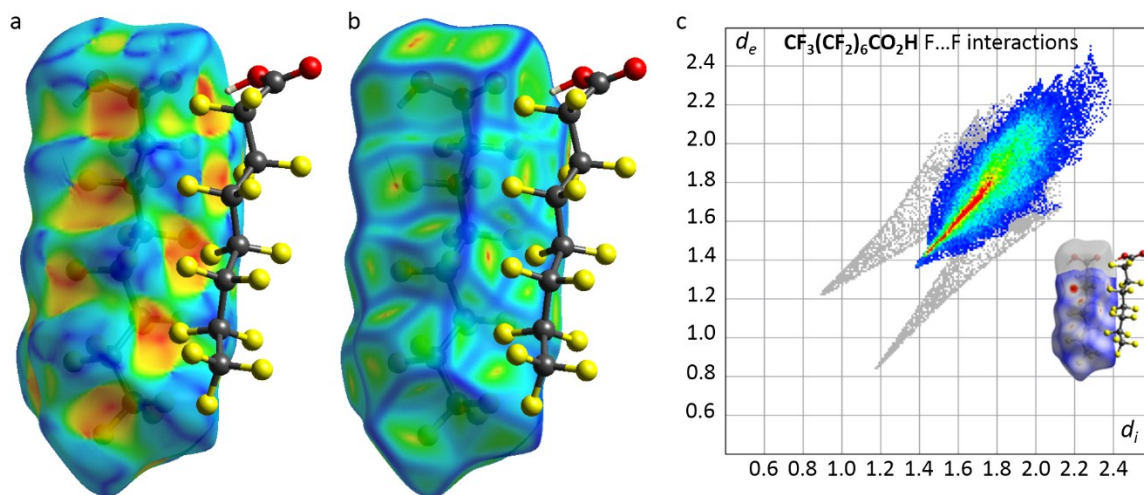

**Figure S17.** Map of (a) shape index (-1 to +1), (b) curvedness (-4 to 0.4) and (c) fingerprint plot showing the F...F interactions for PFOA.

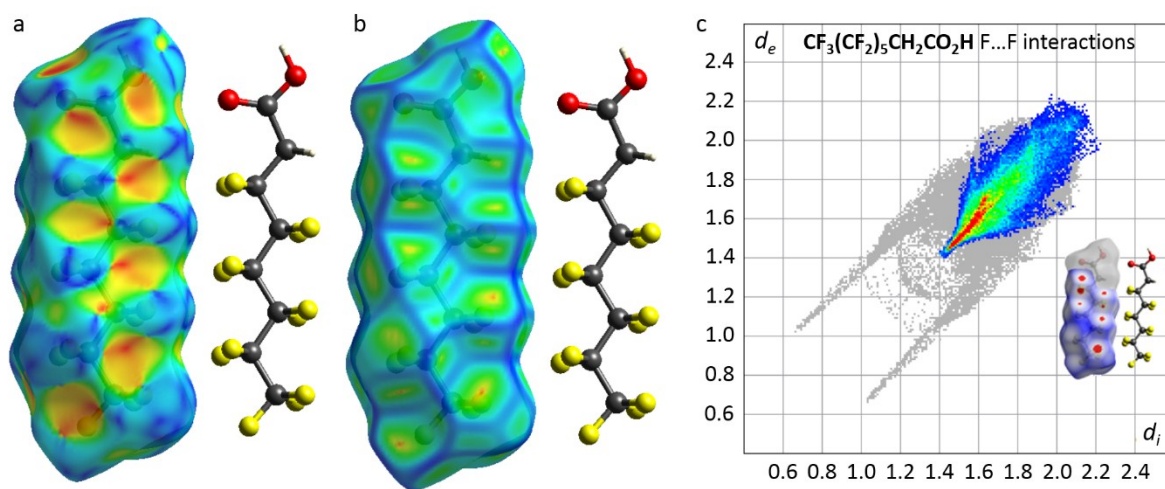

**Figure S18.** Map of (a) shape index (-1 to +1), (b) curvedness (-4 to 0.4) and (c) fingerprint plot showing the F...F interactions for  $\text{CF}_3(\text{CF}_2)_5\text{CH}_2\text{CO}_2\text{H}$ .

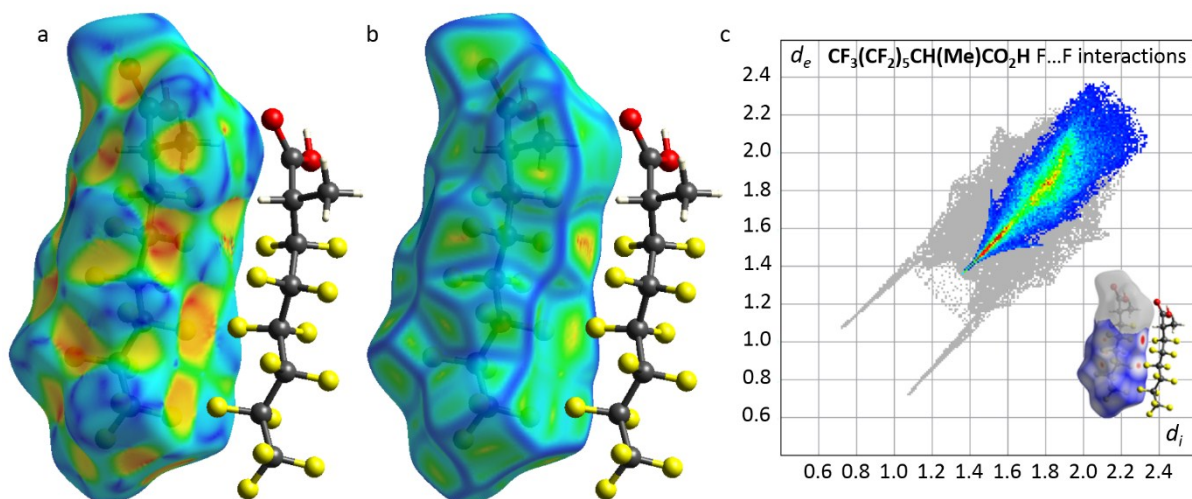

**Figure S19.** Map of (a) shape index (-1 to +1), (b) curvedness (-4 to 0.4) and (c) fingerprint plot showing the F...F interactions for  $\text{CF}_3(\text{CF}_2)_5\text{CH}(\text{Me})\text{CO}_2\text{H}$ .

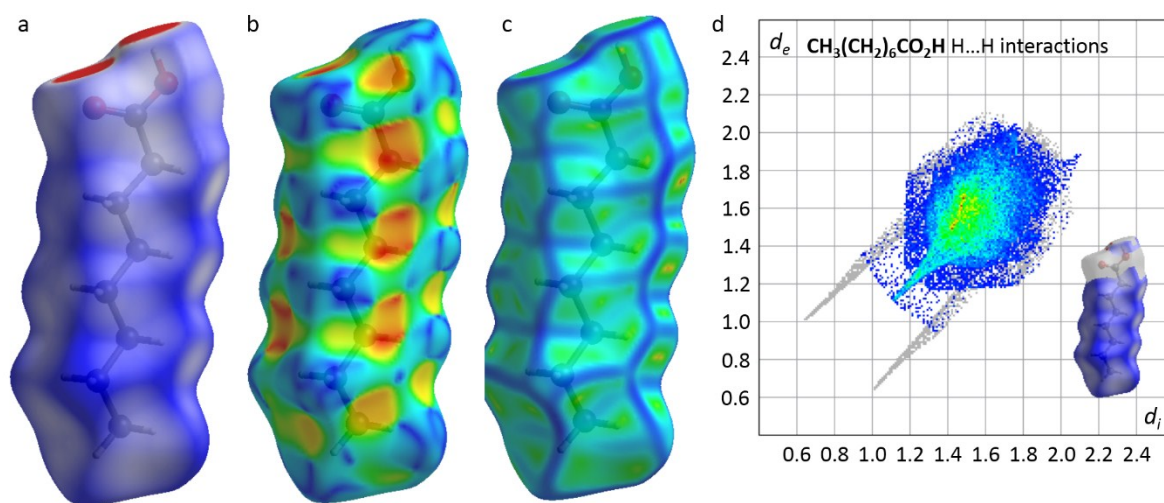

**Figure S20.** Map of (a)  $d_{\text{norm}}$  (-0.1 to 1.0), (b) shape index (-1 to +1), (c) curvedness (-4 to 0.4) and (d) fingerprint plot showing the H...H interactions for  $\text{CH}_3(\text{CH}_2)_6\text{CO}_2\text{H}$ .

## Thermal characterization of hosts and host:guest complexes

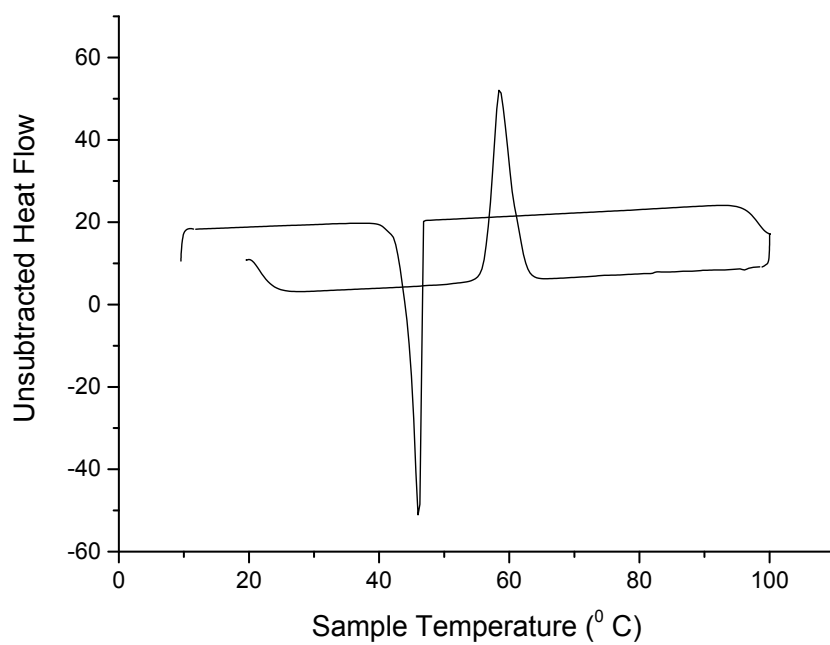

**Figure S21.** DSC Thermogram of PFOA.



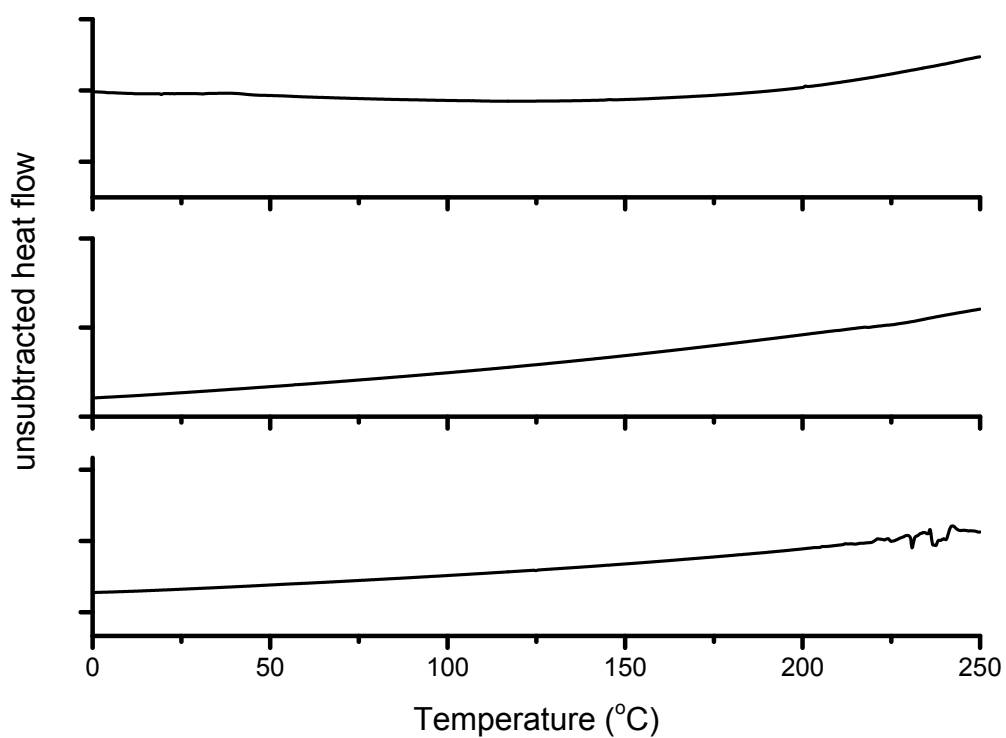

**Figure S22.** DSC Thermograms of **5** (top), 1:1 complex (middle) and 2:1 complex (bottom).

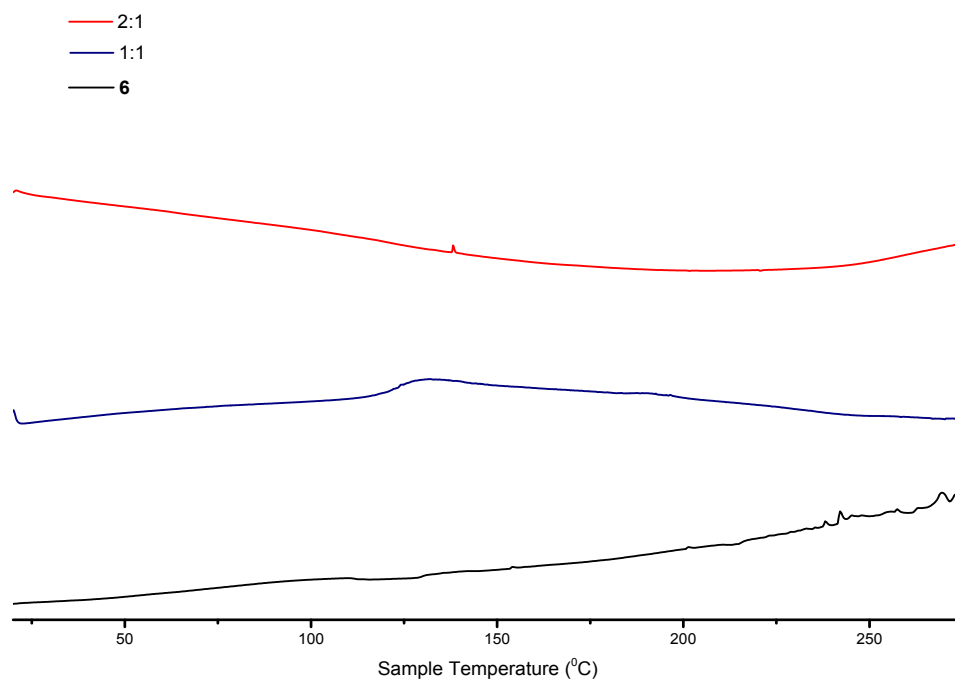

**Figure S23.** DSC Thermograms of **6** (bottom), 1:1 complex (middle) and 2:1 complex (top).

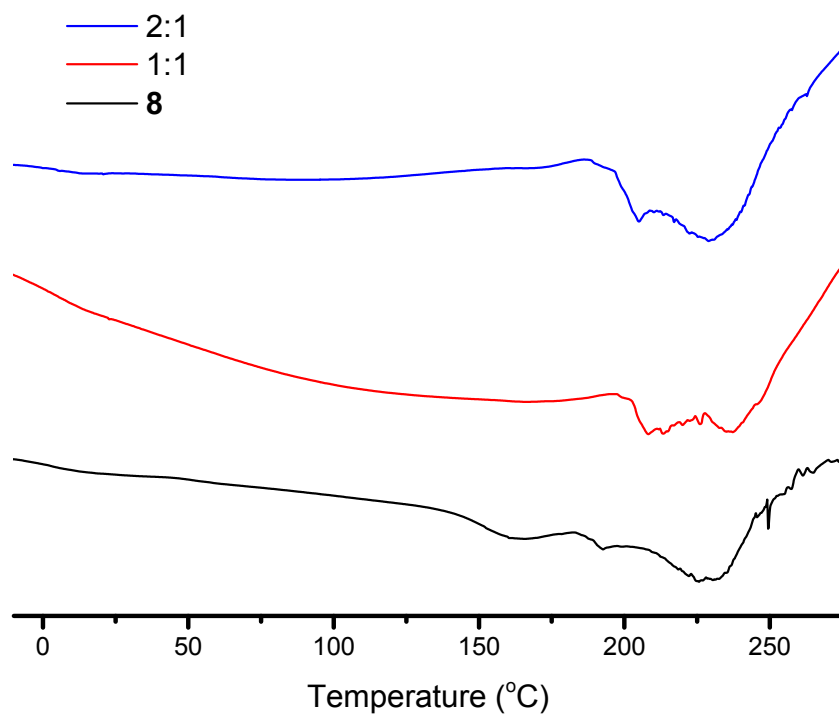

**Figure S24.** DSC Thermograms of **8** (bottom), 1:1 complex (middle) and 2:1 complex (top).

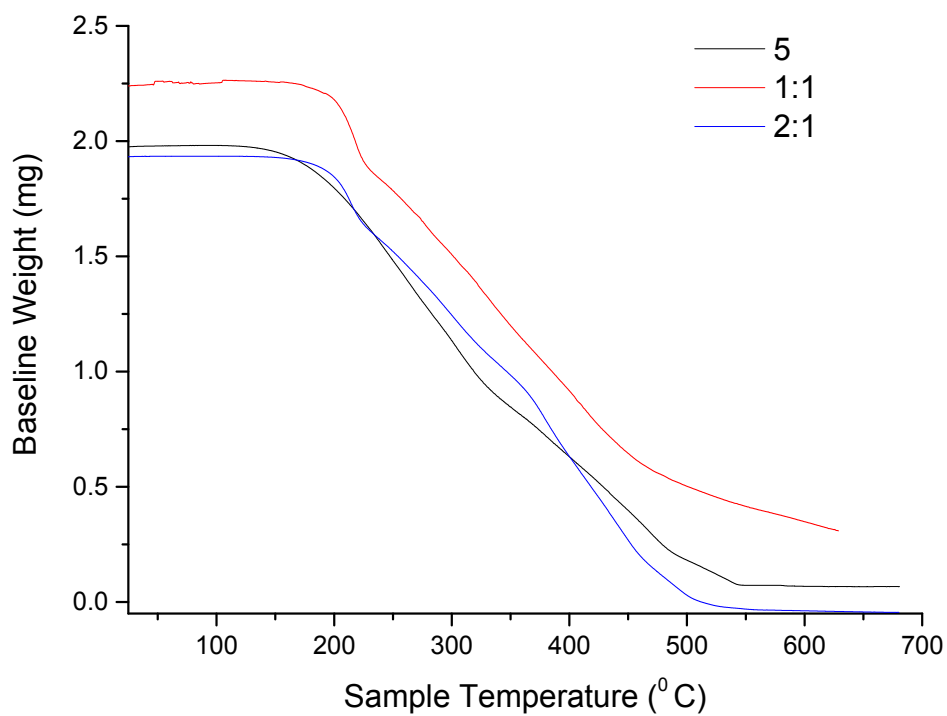

**Figure S25.** TGA of **5** and its 1:1 and 2:1 host:guest complexes.

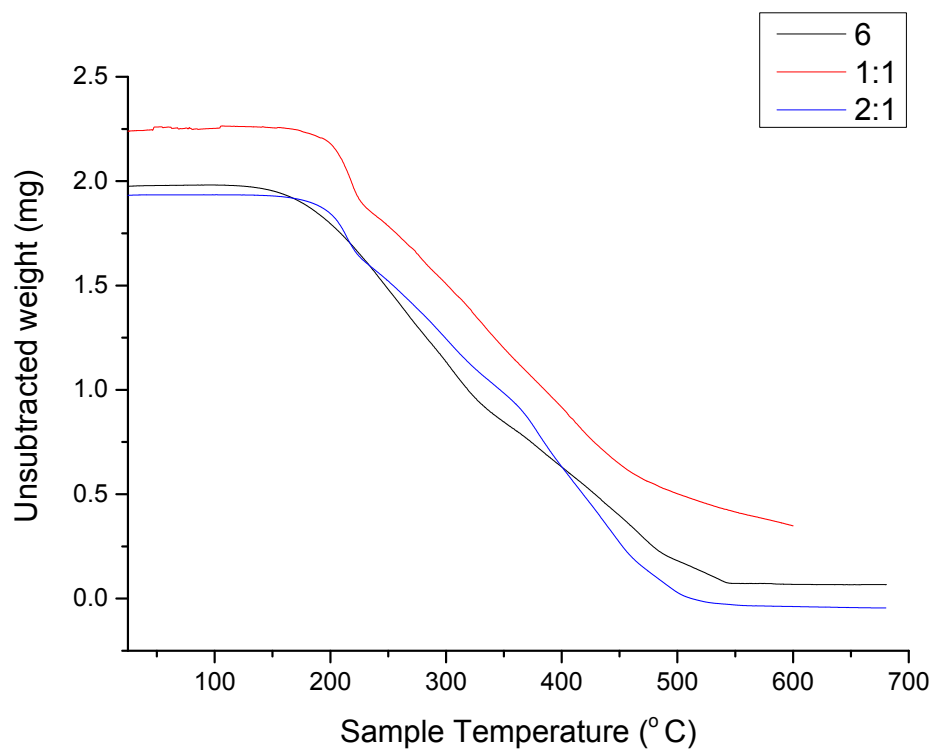

**Figure S26.** TGA of **6** and its 1:1 and 2:1 host:guest complexes.

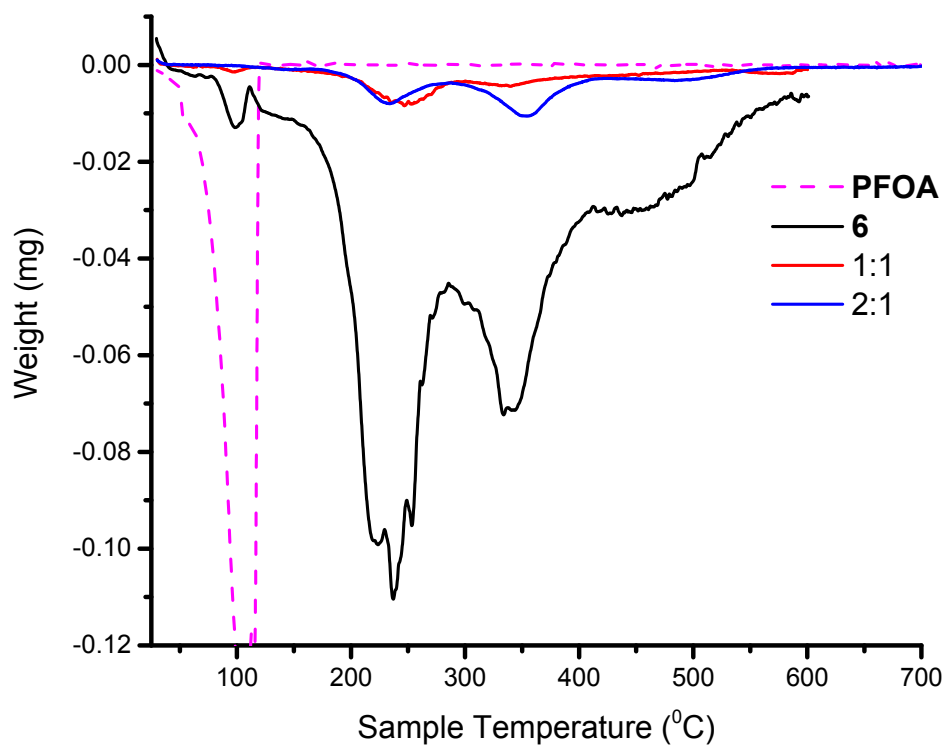

**Figure S27.** TGA (Derivative weight) of **6** and its 1:1 and 2:1 host:guest complexes.

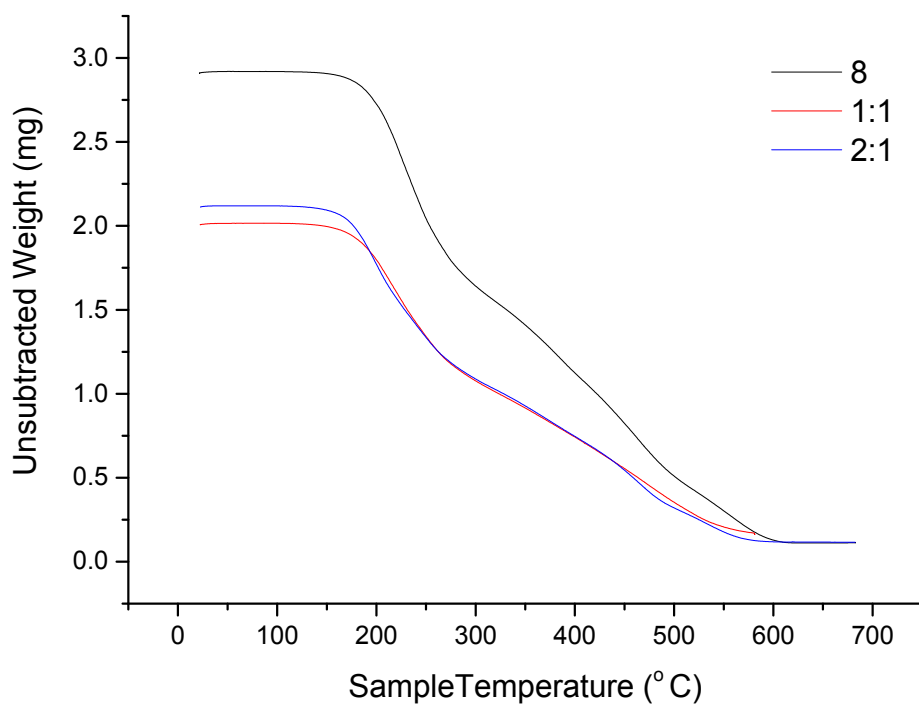

**Figure S28.** TGA of **8** and its 1:1 and 2:1 host:guest complexes.

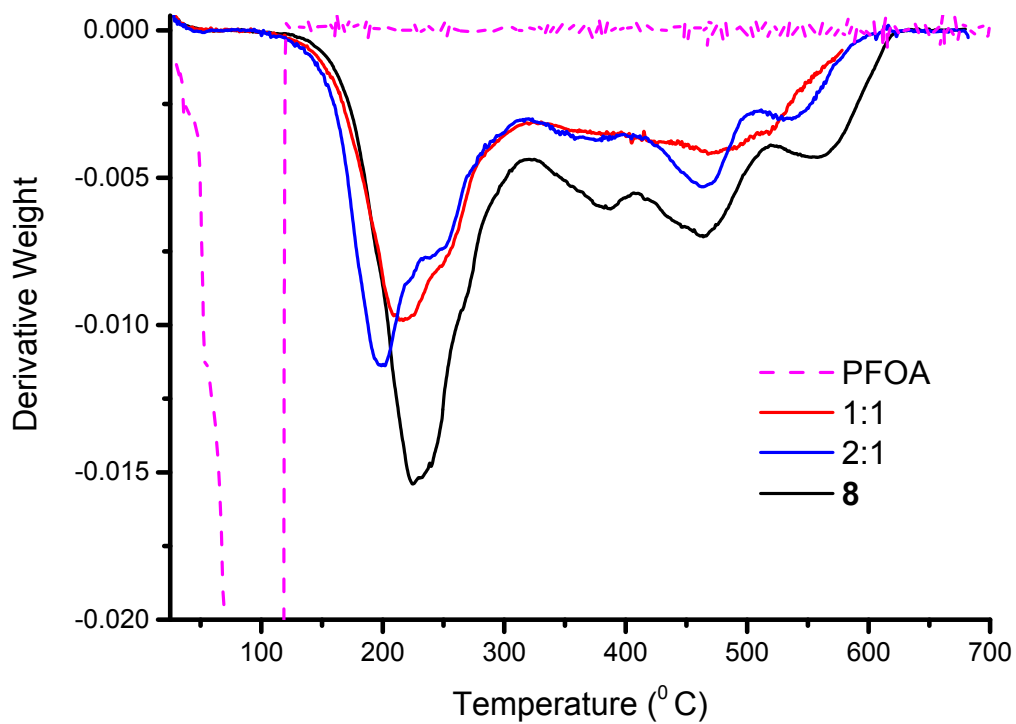

**Figure S29.** Derivative weight TGA of **8** and the 1:1 and 2:1 inclusion complexes.

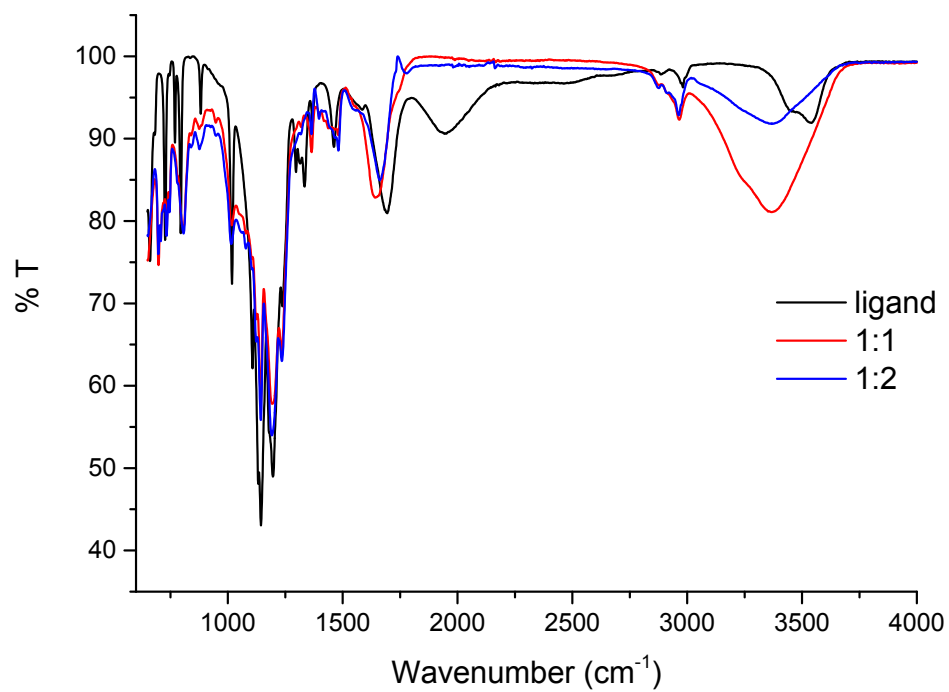

**Figure S30.** IR spectrum of **6** and its PFOA complexes.

## $^1\text{H}$ and $^{19}\text{F}$ NMR titration experiments

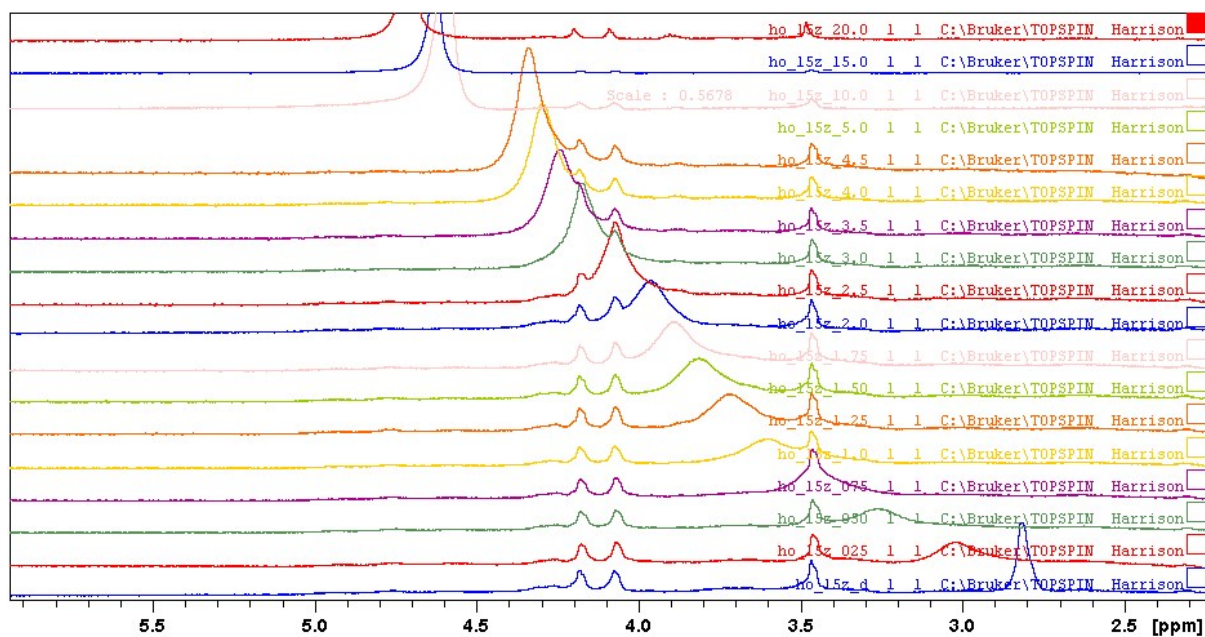

**Figure S31.**  $^1\text{H}$  NMR titration of **5** and varying amounts of PFOA (0 – 20 eq.) in  $d_6$ -acetone at 300 K.

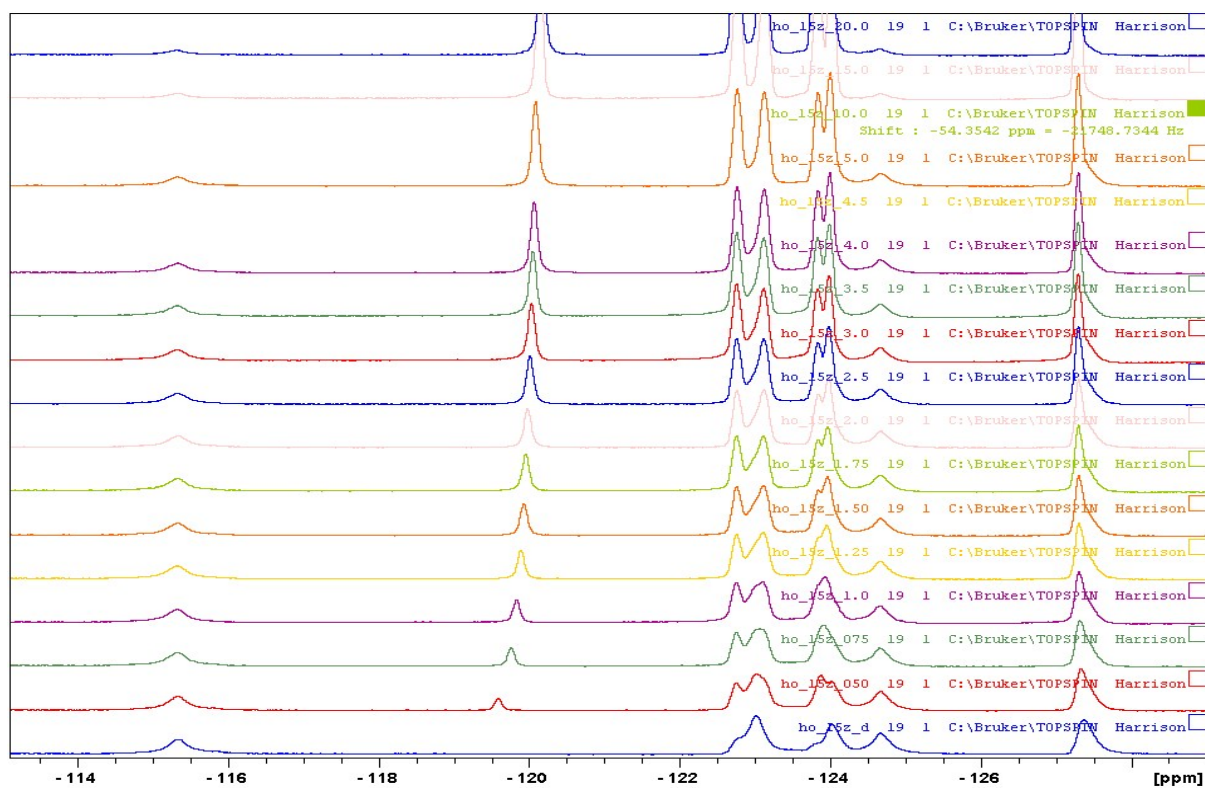

**Figure S32.**  $^{19}\text{F}$  NMR titration of **5** and varying amounts of PFOA (0 – 20 eq.) in  $d_6$ -acetone at 300 K.

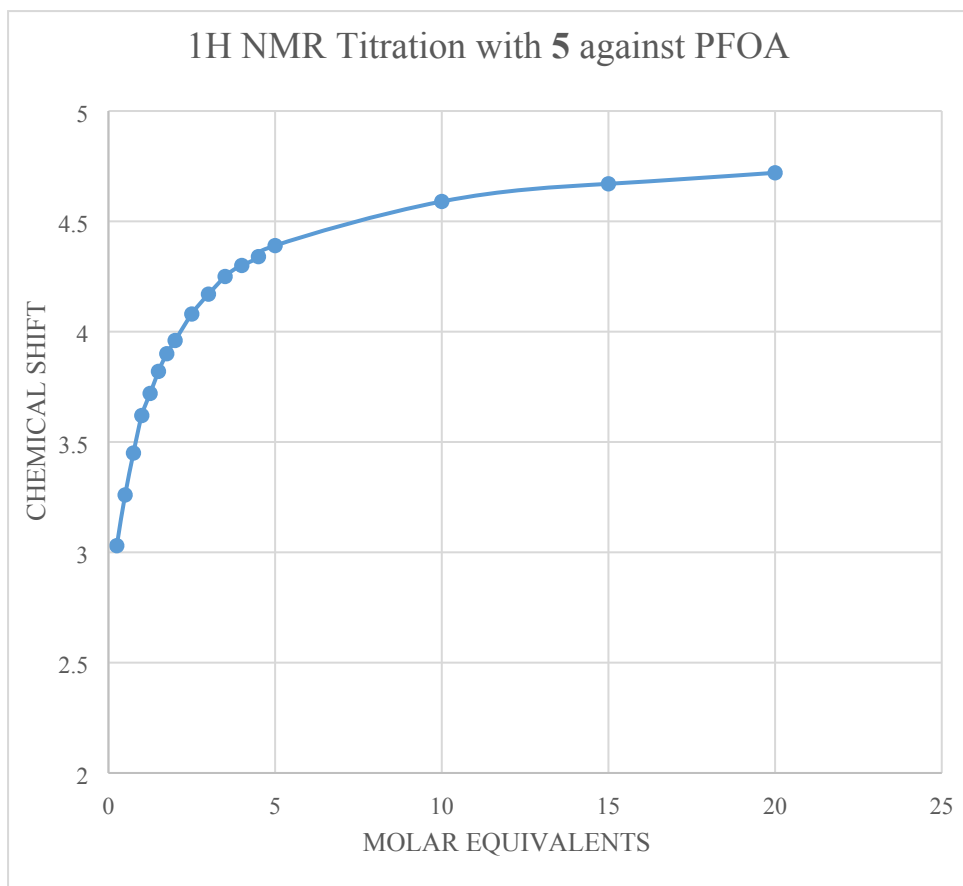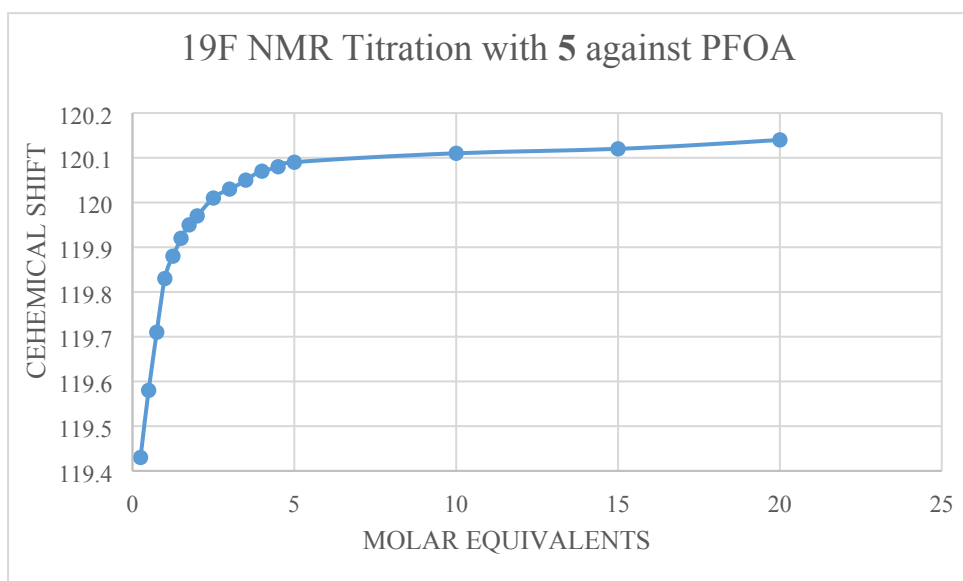

**Figure S33.** Plot of  $\delta_H$  (top) and  $\delta_F$  (bottom) changes upon addition of 0-20 equivalents of PFOA.



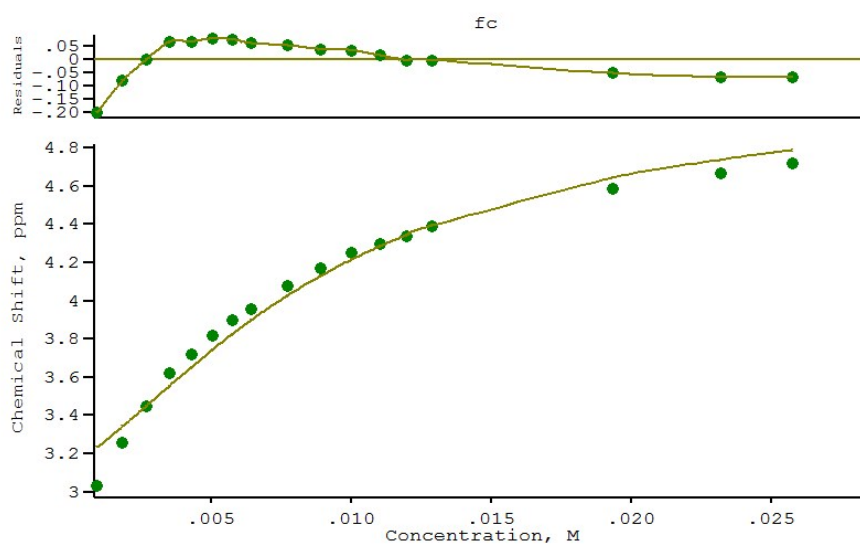

fc  
pfoa  
chemical shift

Equilibrium constants are log10 values

| NO. | A | PARAMETER   | DELTA     | ERROR     | CONDITION | DESCRIPTION        |
|-----|---|-------------|-----------|-----------|-----------|--------------------|
| 1   | 1 | 2.66224E+00 | 1.000E-02 | 3.497E-01 | 3.316E+02 | stability constant |
| 2   | 1 | 2.05479E+00 | 1.000E-02 | 1.094E+00 | 5.446E+02 | concentration      |
| 3   | 1 | 5.28999E+00 | 1.000E-02 | 2.063E-01 | 4.520E+01 | chemical shift     |

ØRMS ERROR = 7.96E-02 MAX ERROR = 2.03E-01 AT OBS.NO. 1  
RESIDUALS SQUARED = 8.87E-02  
RFACTOR = 1.7861 PERCENT

**Figure S34.** Analysis of  $\delta_H$  changes upon addition of 0-20 equivalents of PFOA.

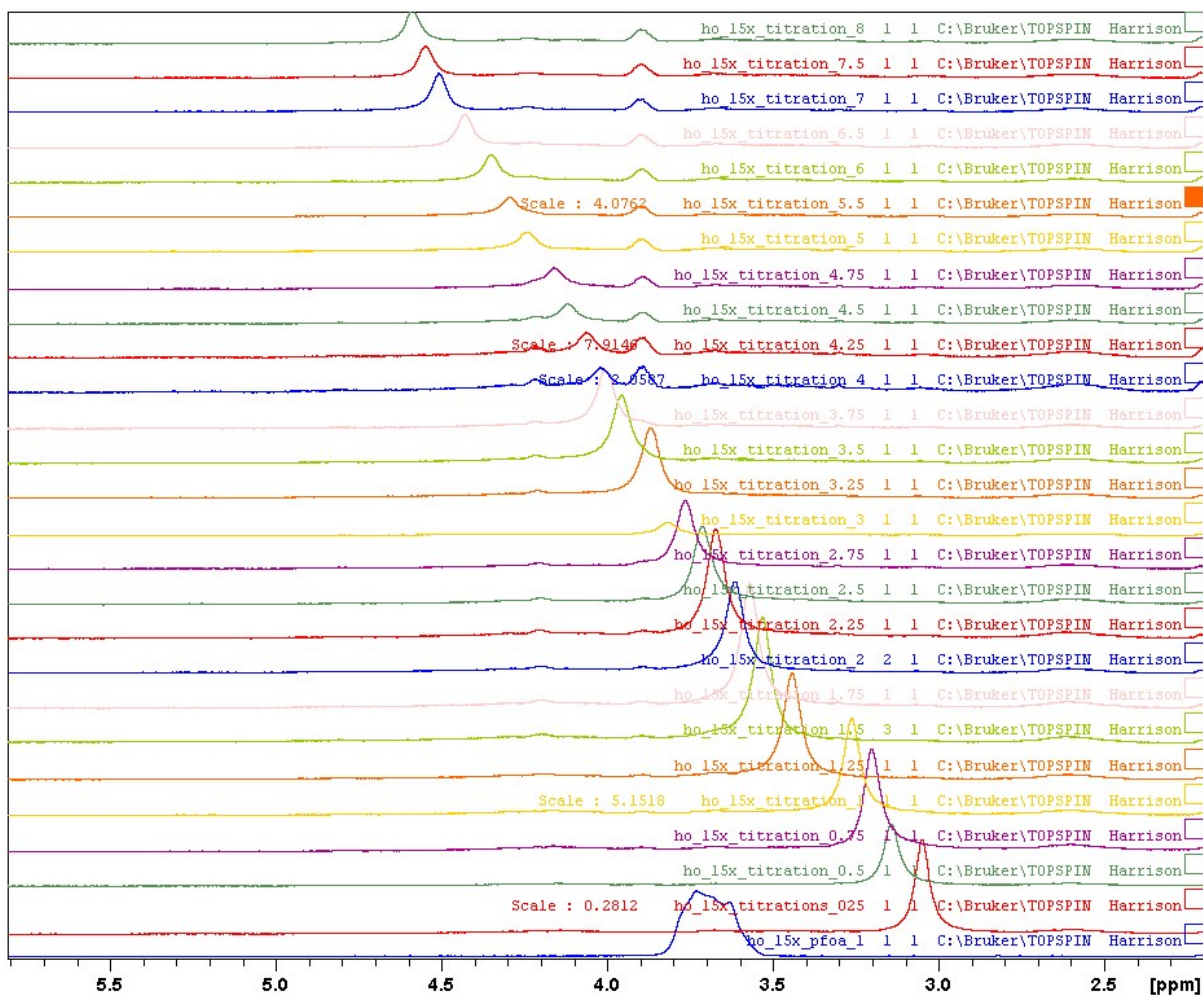

**Figure S35.** <sup>1</sup>H NMR titration of **6** and varying amounts of PFOA (0 – 8 eq.) in d<sub>6</sub>-acetone at 300 K.

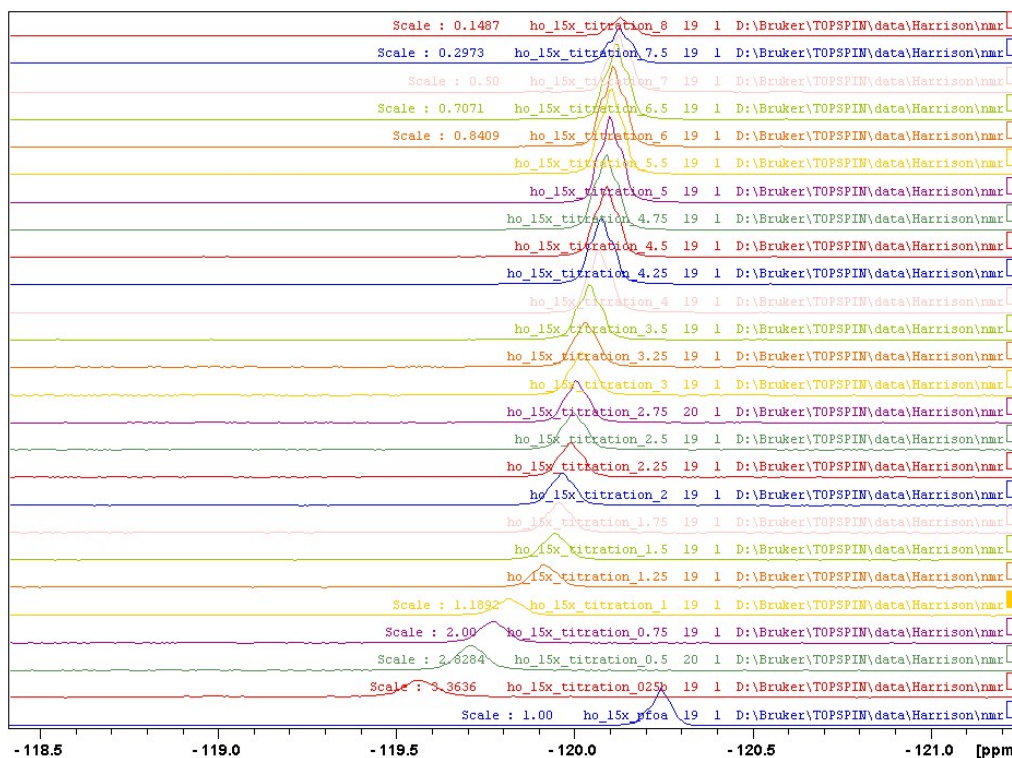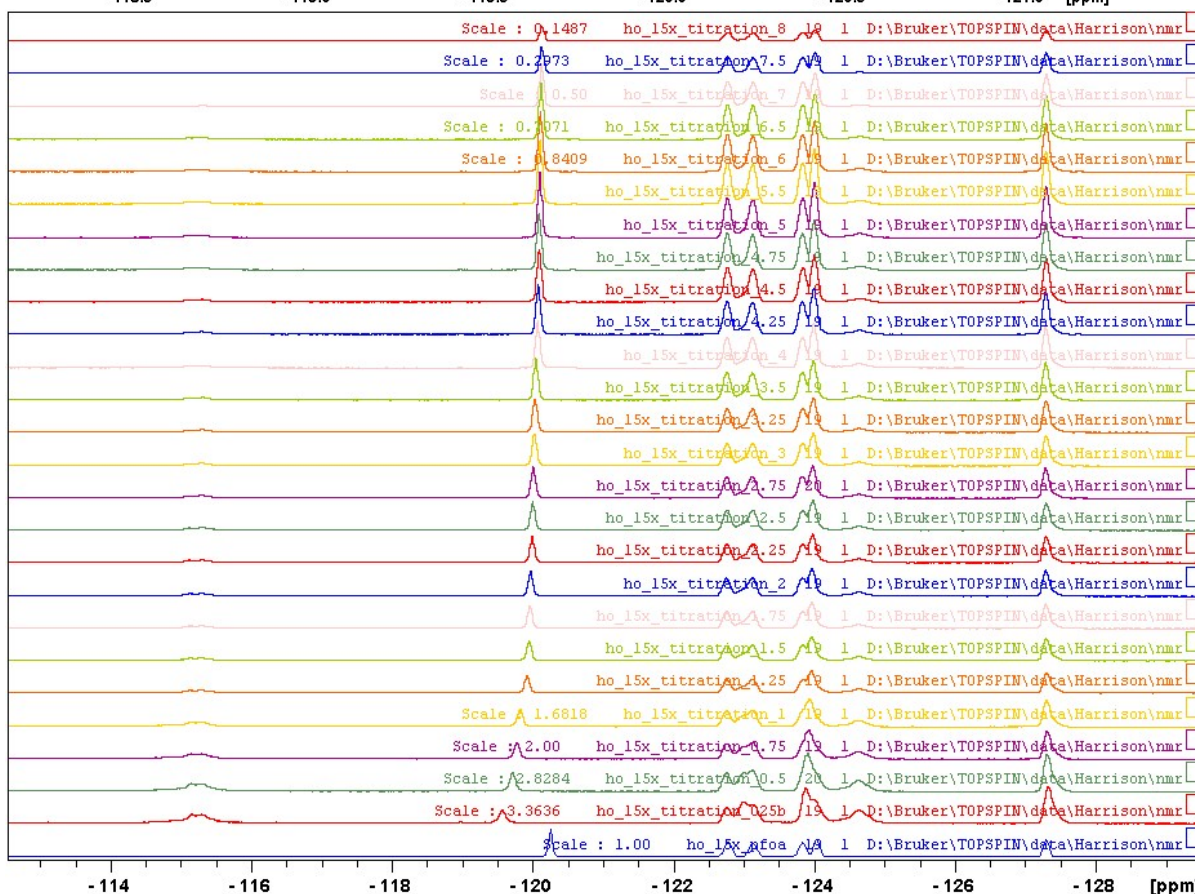

**Figure S36.**  $^{19}\text{F}$  NMR titration of **6** and varying amounts of PFOA (0 – 8 eq.) in  $\text{d}_6$ -acetone at 300 K.

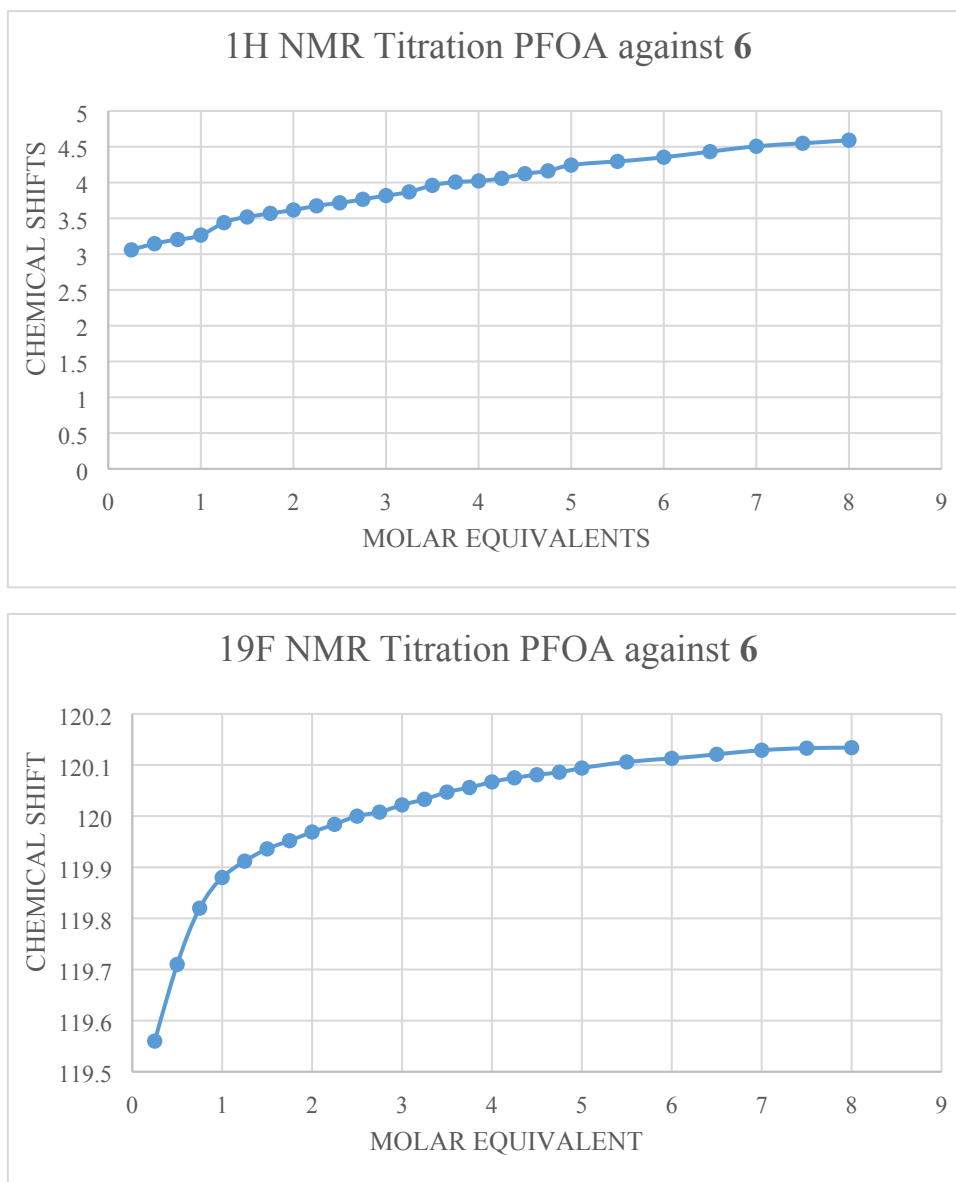

**Figure S37.** Plot of  $\delta_H$  (top) and  $\delta_F$  (bottom) changes upon addition of 0-8 equivalents of PFOA.



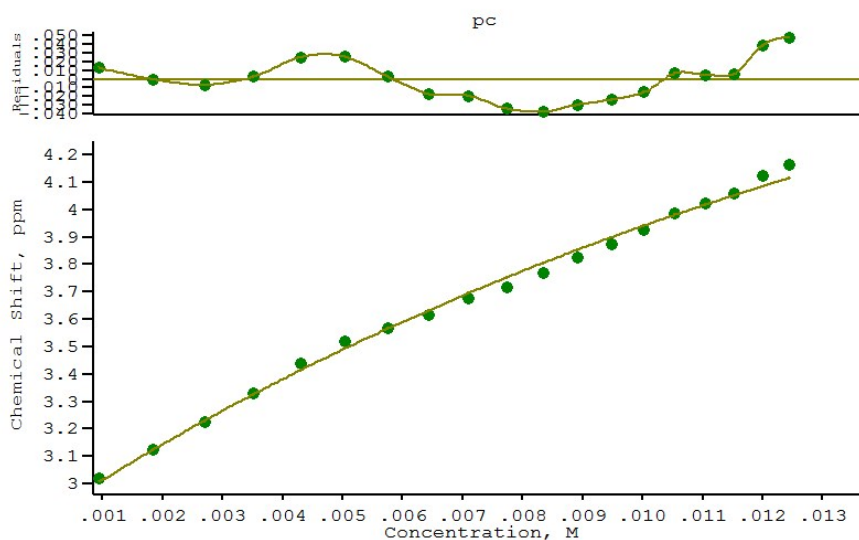

pc  
pfoa  
chemical shift

Equilibrium constants are log10 values

| NO. | A | PARAMETER    | DELTA     | ERROR     | CONDITION | DESCRIPTION        |
|-----|---|--------------|-----------|-----------|-----------|--------------------|
| 1   | 1 | 1.90154E+00  | 1.000E-02 | 2.181E-01 | 1.640E+04 | stability constant |
| 2   | 1 | -6.39419E+00 | 1.000E-02 | 6.270E+00 | 4.585E+04 | concentration      |
| 3   | 1 | 6.12742E+00  | 1.000E-02 | 6.402E-01 | 7.795E+03 | chemical shift     |

ØRMS ERROR = 2.54E-02 MAX ERROR = 4.75E-02 AT OBS.NO. 19  
RESIDUALS SQUARED = 1.03E-02  
RFACOR = 0.6300 PERCENT

**Figure S38.** Analysis of  $\delta_H$  changes upon addition of 0-8 equivalents of PFOA.

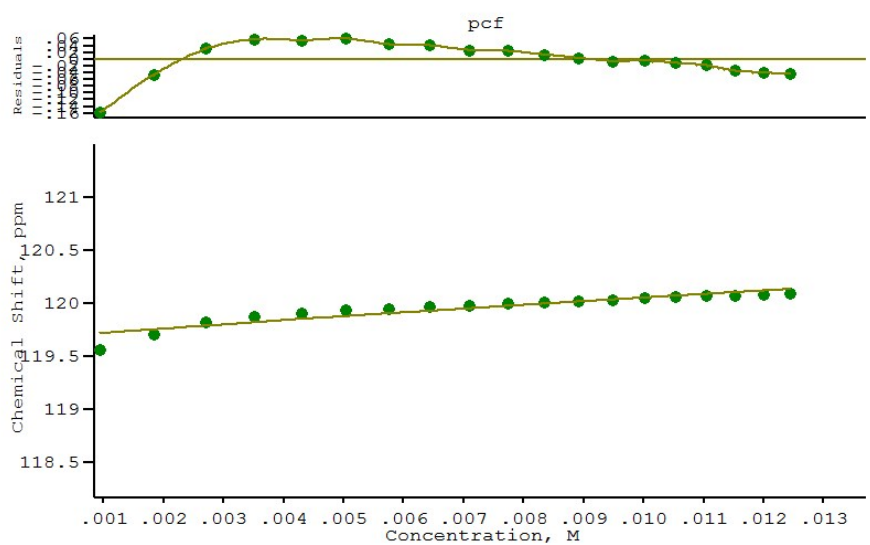

pcf  
pfoa  
chemical shift

Equilibrium constants are log10 values

| NO. | A | PARAMETER   | DELTA     | ERROR     | CONDITION | DESCRIPTION        |
|-----|---|-------------|-----------|-----------|-----------|--------------------|
| 1   | 1 | 1.14118E+00 | 1.000E-02 | 1.991E-01 | 1.070E+04 | stability constant |
| 2   | 1 | 6.21818E+01 | 1.000E-02 | 4.527E+01 | 3.535E+04 | concentration      |
| 3   | 1 | 1.23168E+02 | 1.000E-02 | 1.155E+00 | 7.467E+03 | chemical shift     |

ØRMS ERROR = 5.52E-02 MAX ERROR = 1.59E-01 AT OBS.NO. 1  
RESIDUALS SQUARED = 4.88E-02  
RFACOR = 0.0422 PERCENT

**Figure S39.** Analysis of  $\delta_F$  changes upon addition of 0-8 equivalents of PFOA.

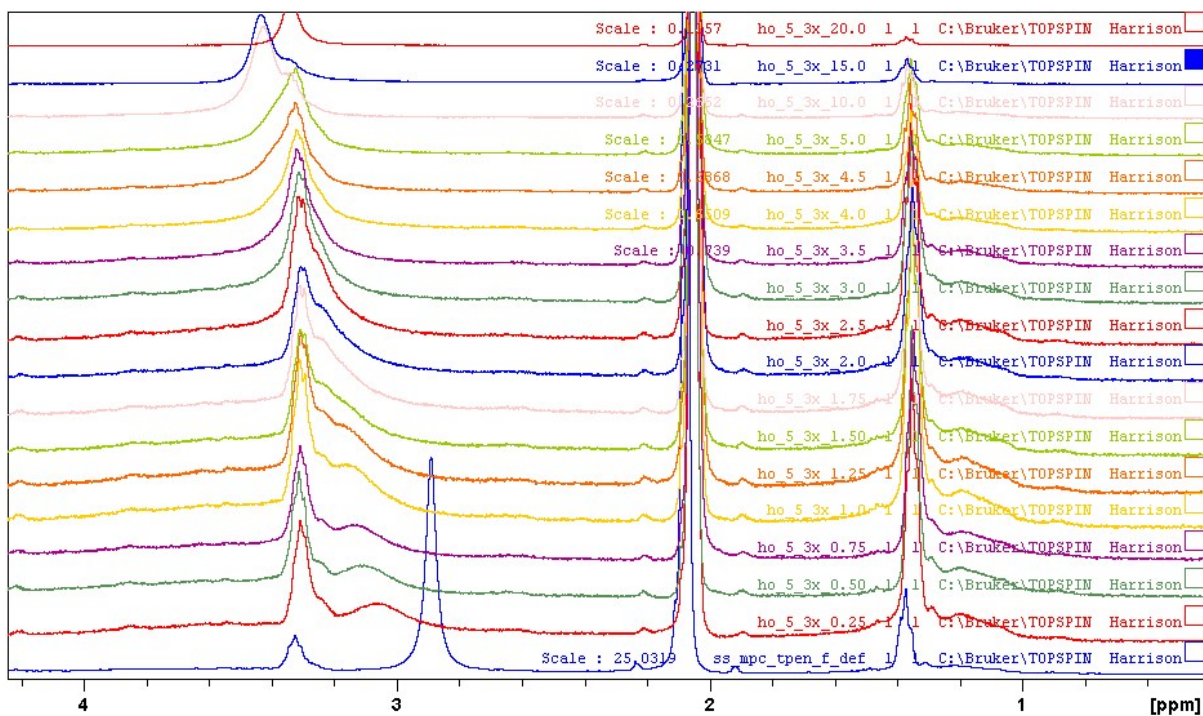

**Figure S40.**  $^1\text{H}$  NMR titration of **8** and varying amounts of PFOA (0 – 20 eq.) in  $\text{d}_6$ -acetone at 300 K.

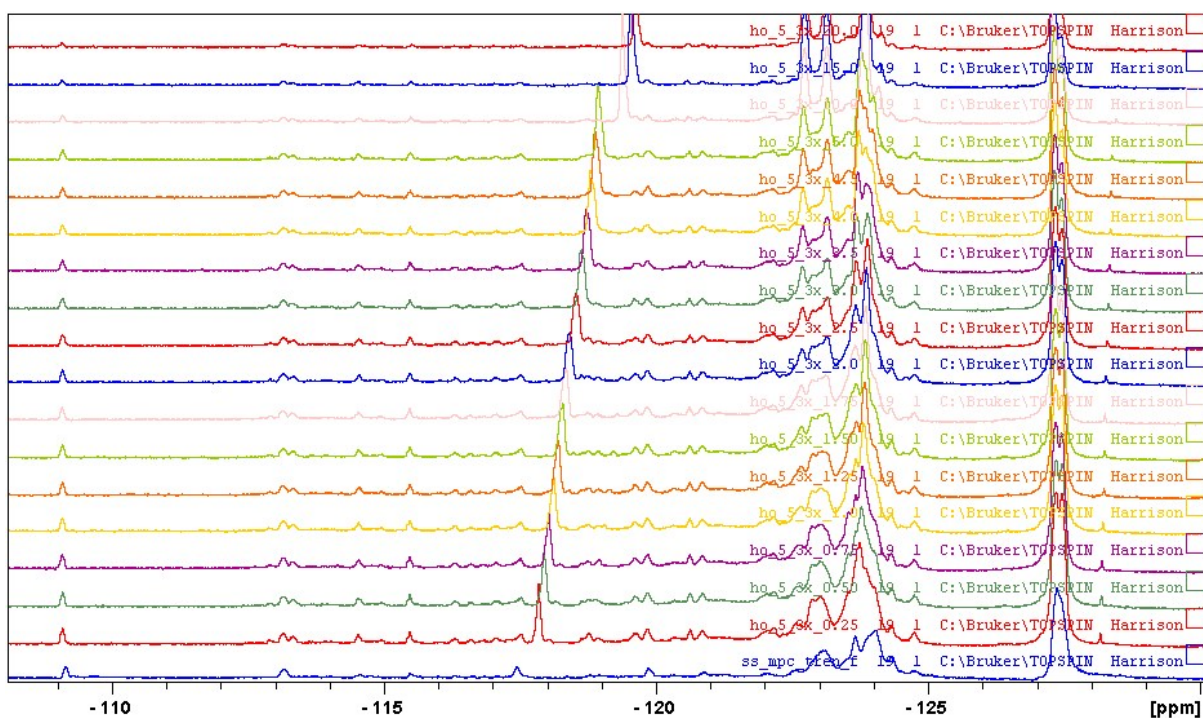

**Figure S41.**  $^{19}\text{F}$  NMR titration of **8** and varying amounts of PFOA (0 – 20 eq.) in  $\text{d}_6$ -acetone at 300 K.

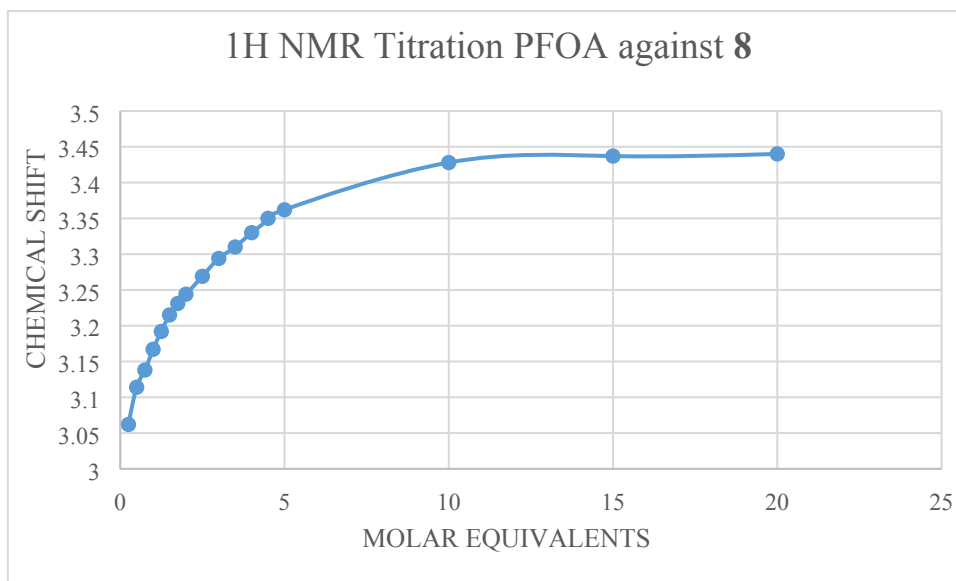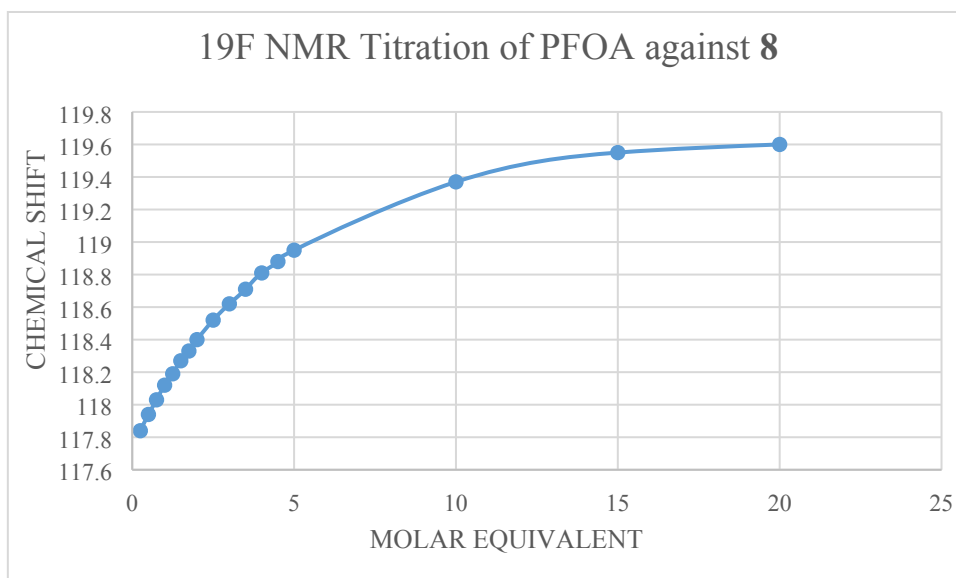

**Figure S42.** Plot of  $\delta_H$  (top) and  $\delta_F$  (bottom) changes upon addition of 0-20 equivalents of PFOA.



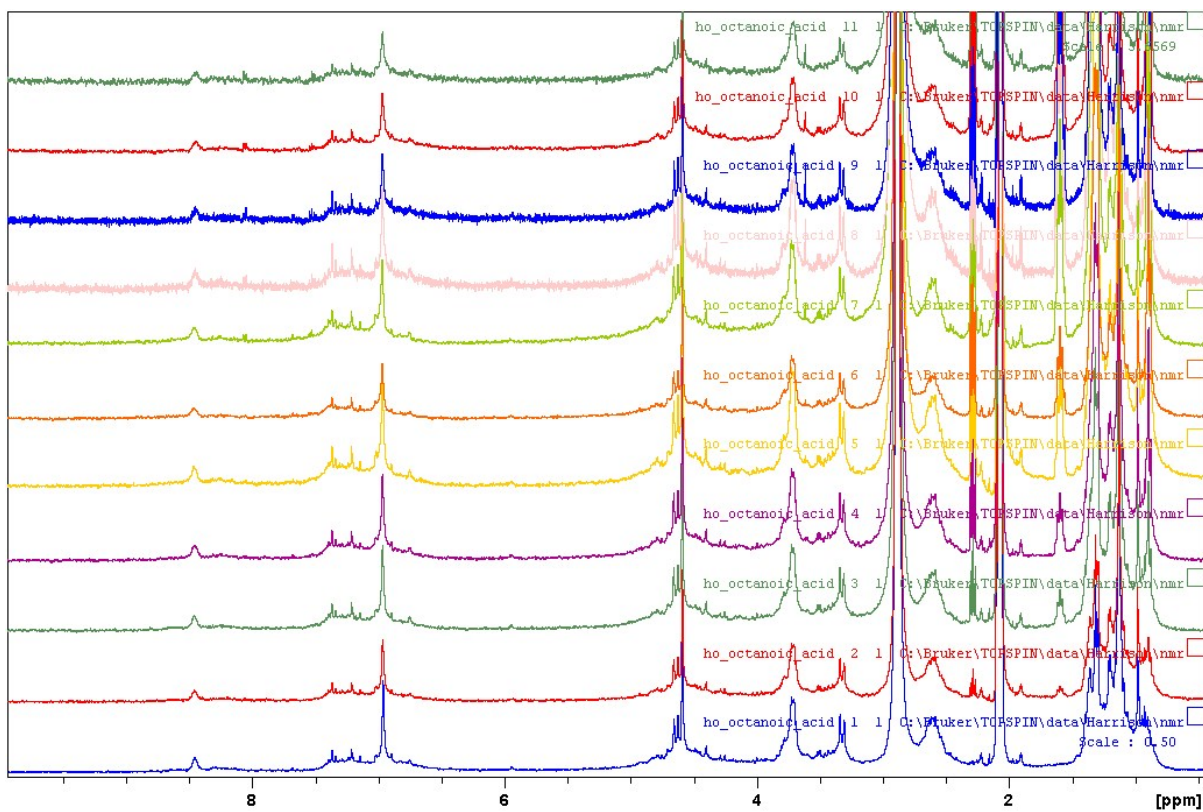

**Figure S43.**  $^1\text{H}$  NMR titration of **5** and varying amounts of octanoic acid (0 – 10 eq.) in  $d_6$ -acetone at 300 K.

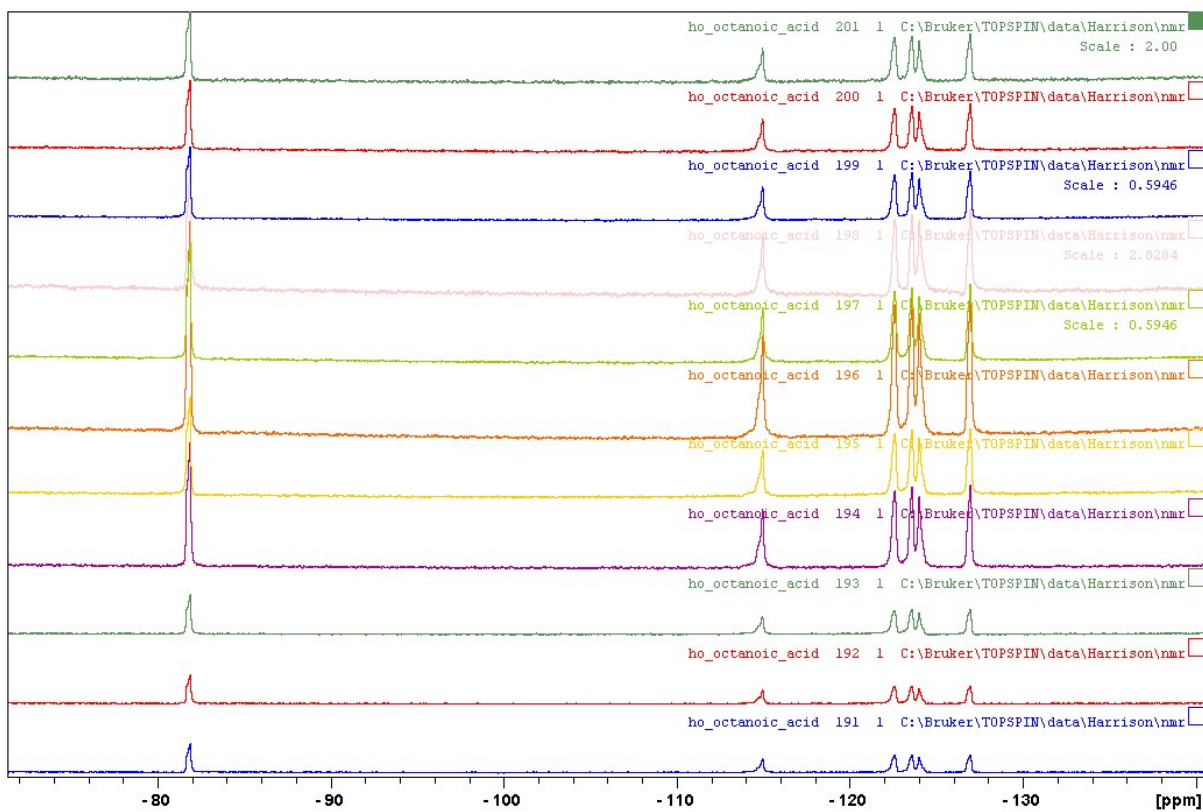

**Figure S44.**  $^{19}\text{F}$  NMR titration of **5** and varying amounts of octanoic acid (0 – 10 eq.) in  $d_6$ -acetone at 300 K.

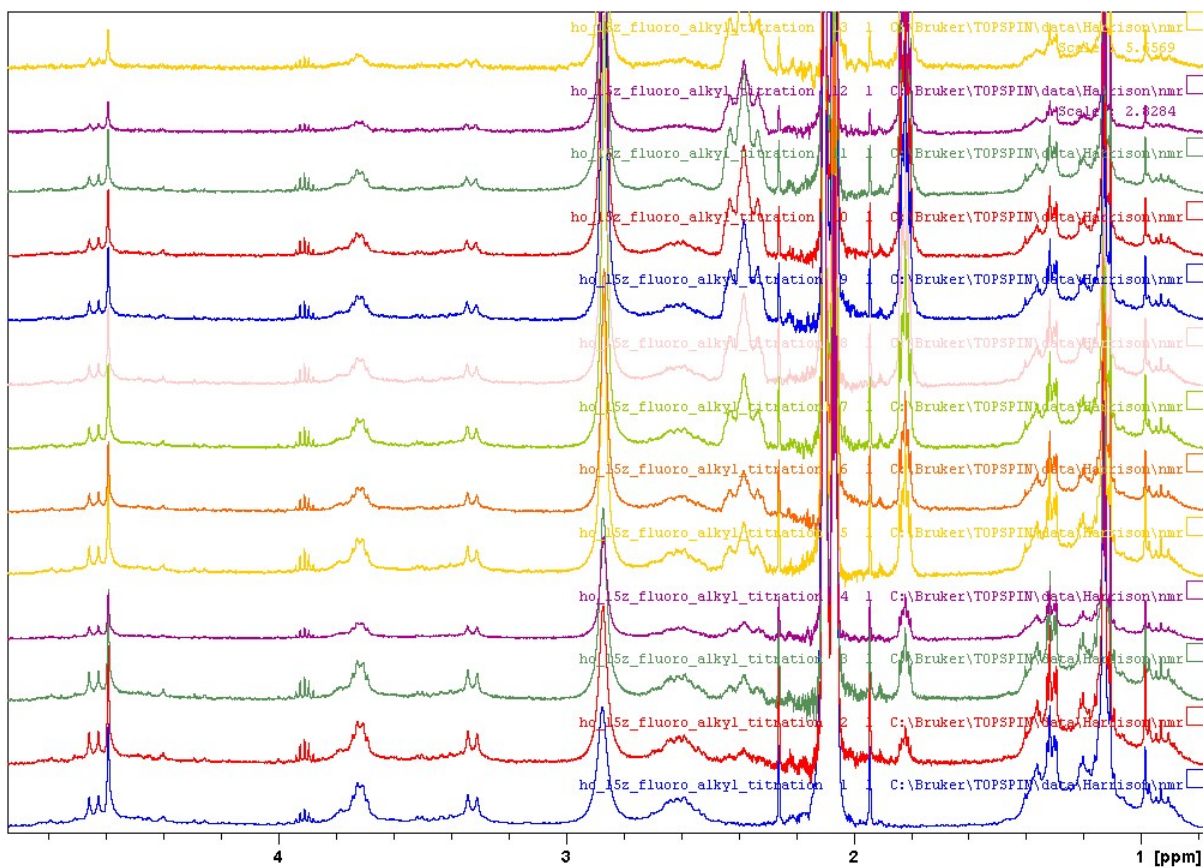

**Figure S45.**  $^1\text{H}$  NMR titration of **5** and varying amounts of  $\{\text{CF}_3(\text{CF}_2)_5\text{CH}_2\text{CH}_2\}_2$  (0 – 20 eq.) in  $d_6$ -acetone at 300 K.

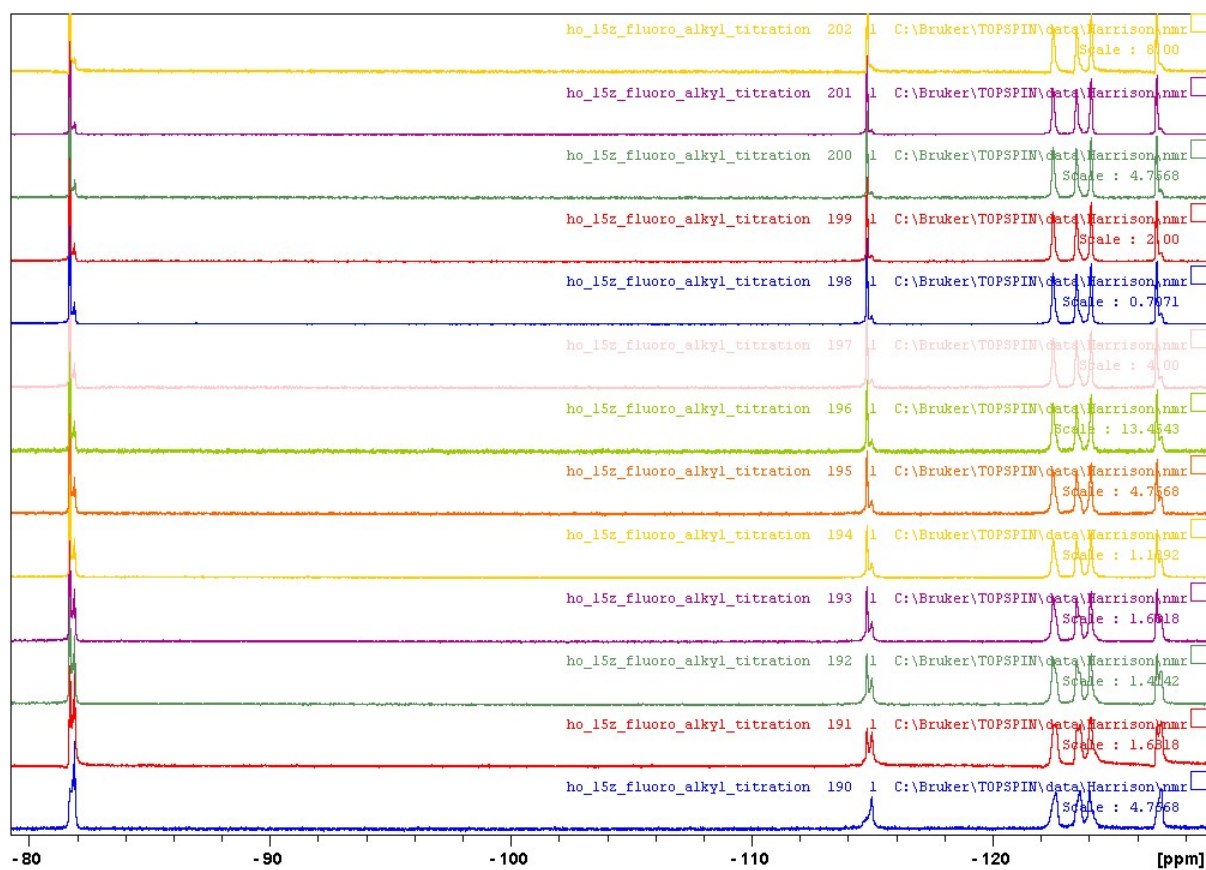

**Figure S46.**  $^{19}\text{F}$  NMR titration of **5** and varying amounts of  $\{\text{CF}_3(\text{CF}_2)_5\text{CH}_2\text{CH}_2\}_2$  (0 – 20 eq.) in  $d_6$ -acetone at 300 K.

## $^{19}\text{F}$ DOSY spectroscopy

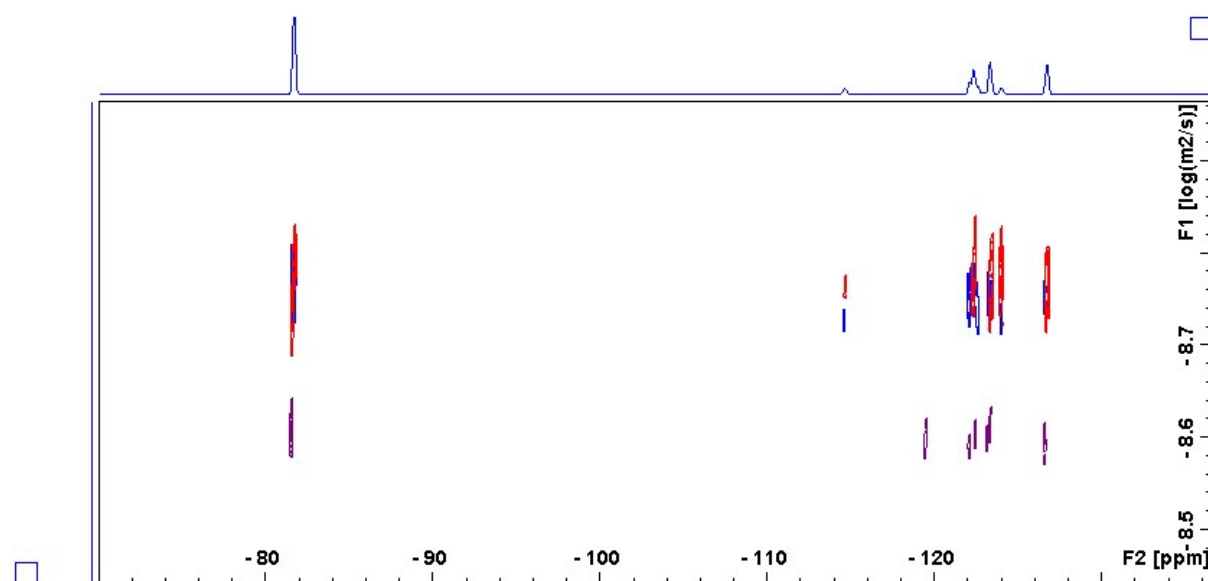

**Figure S47.**  $^{19}\text{F}$  DOSY spectra of **5** (red) the 2:1 complex (blue) and PFOA (purple) in  $d_6$ -Acetone at 300 K.

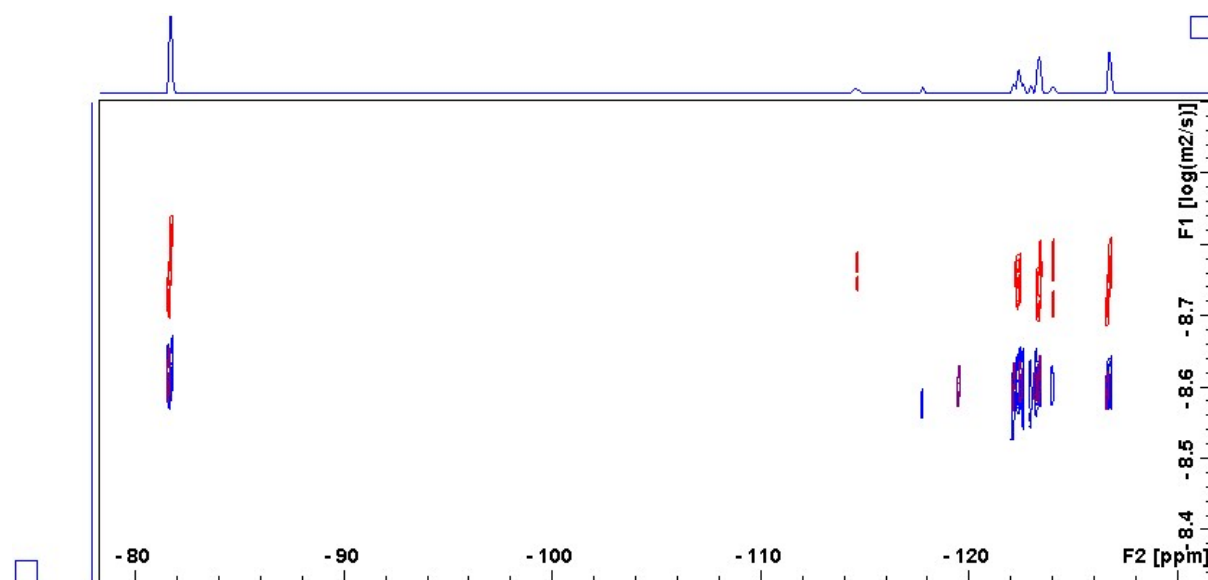

**Figure S48.**  $^{19}\text{F}$  DOSY spectra of **6** (red) the 2:1 complex (blue) and PFOA (purple) in  $d_6$ -Acetone at 300 K.

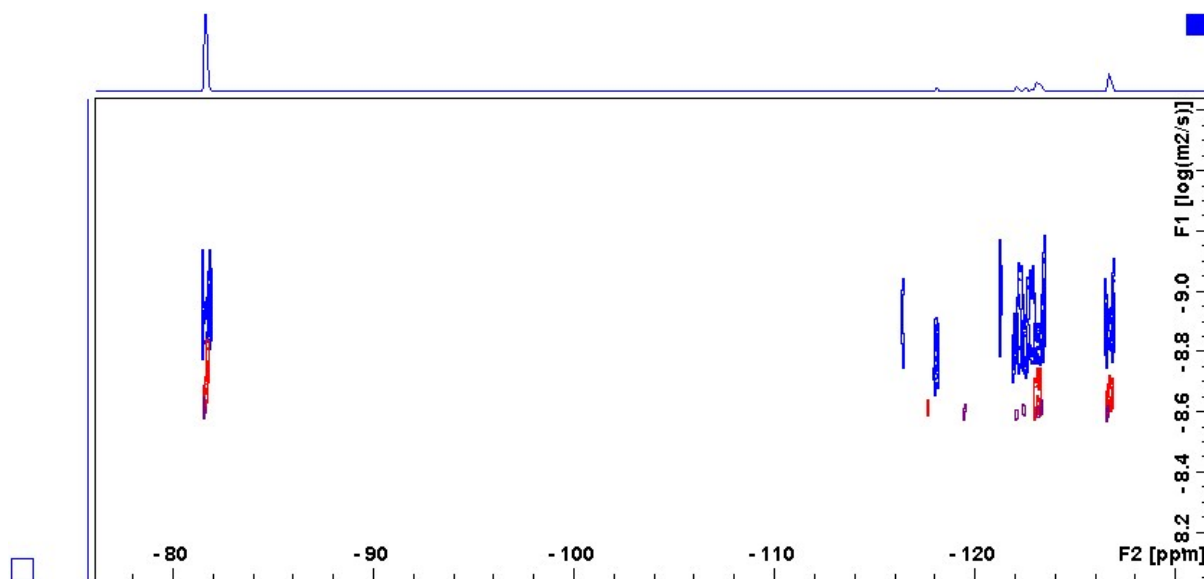

**Figure S49.**  $^{19}\text{F}$  DOSY spectra of **8** (red) the 1:1 complex (blue) and PFOA (purple) in  $\text{d}_6$ -Acetone at 300 K.

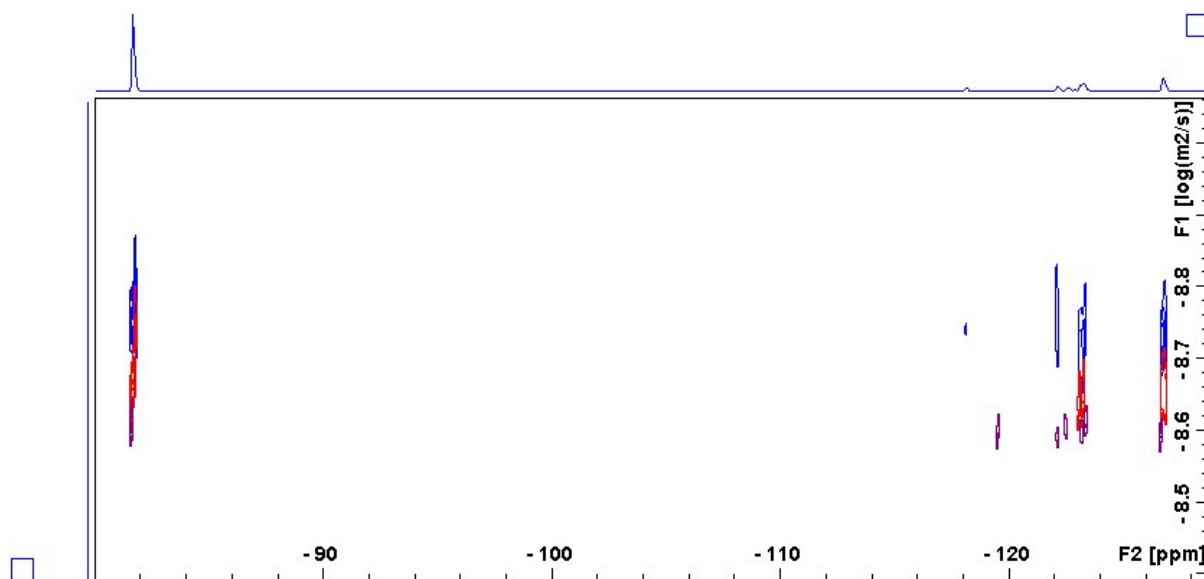

**Figure S50.**  $^{19}\text{F}$  DOSY spectra of **8** (red) the 2:1 complex (blue) and PFOA (purple) in  $\text{d}_6$ -Acetone at 300 K.



## Solid-State NMR spectroscopy of hosts and host:guest complexes

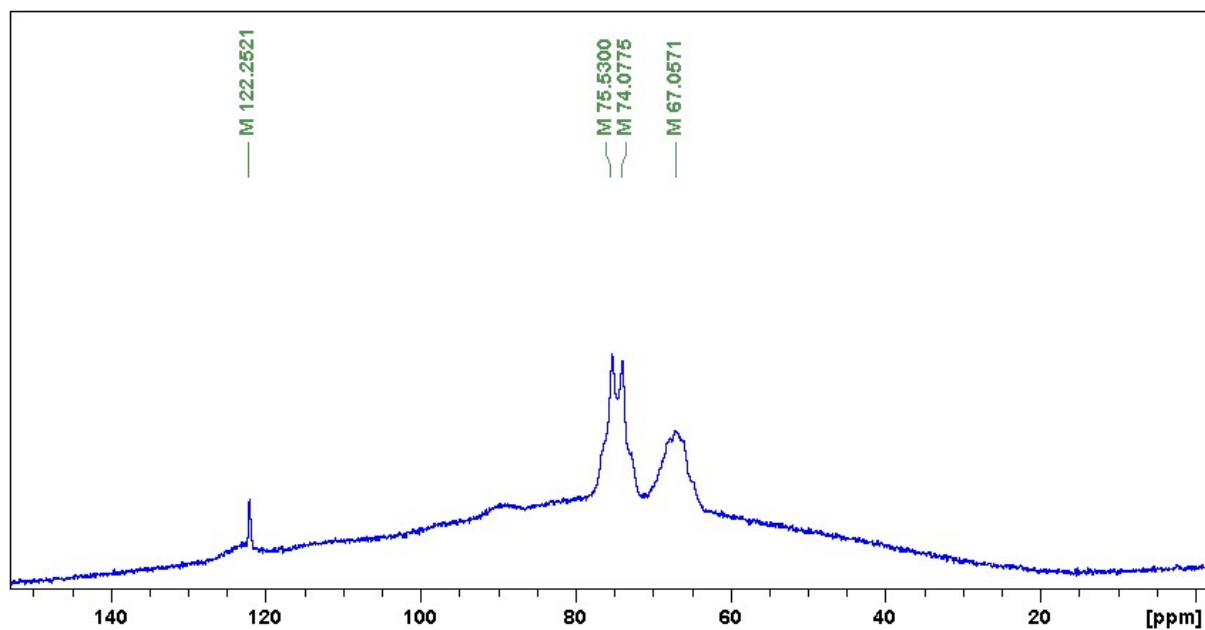

**Figure S51.**  $^{13}\text{C}\{^{19}\text{F}\}$  MAS NMR spectrum of **PFOA** at 20 kHz spin rate and 298 K.

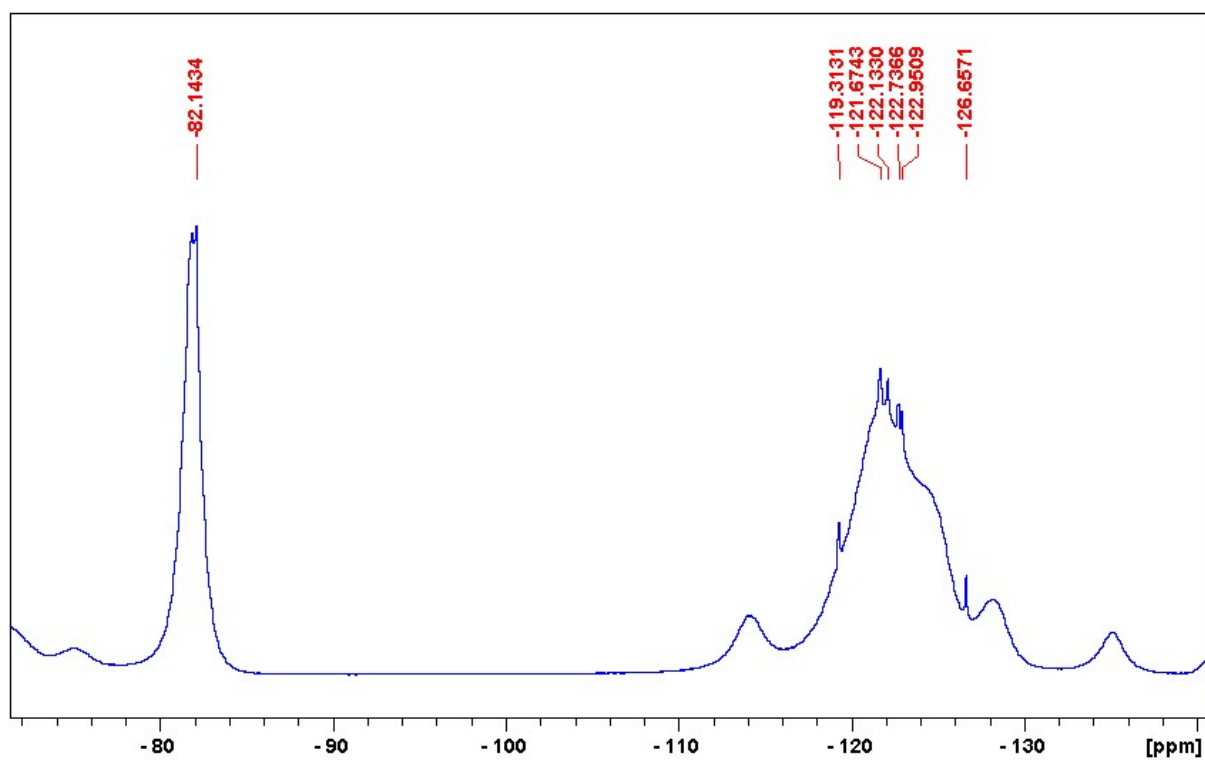

**Figure S52.**  $^{19}\text{F}\{^{13}\text{C}\}$  MAS NMR spectrum of **PFOA** at 20 kHz spin rate and 298 K.

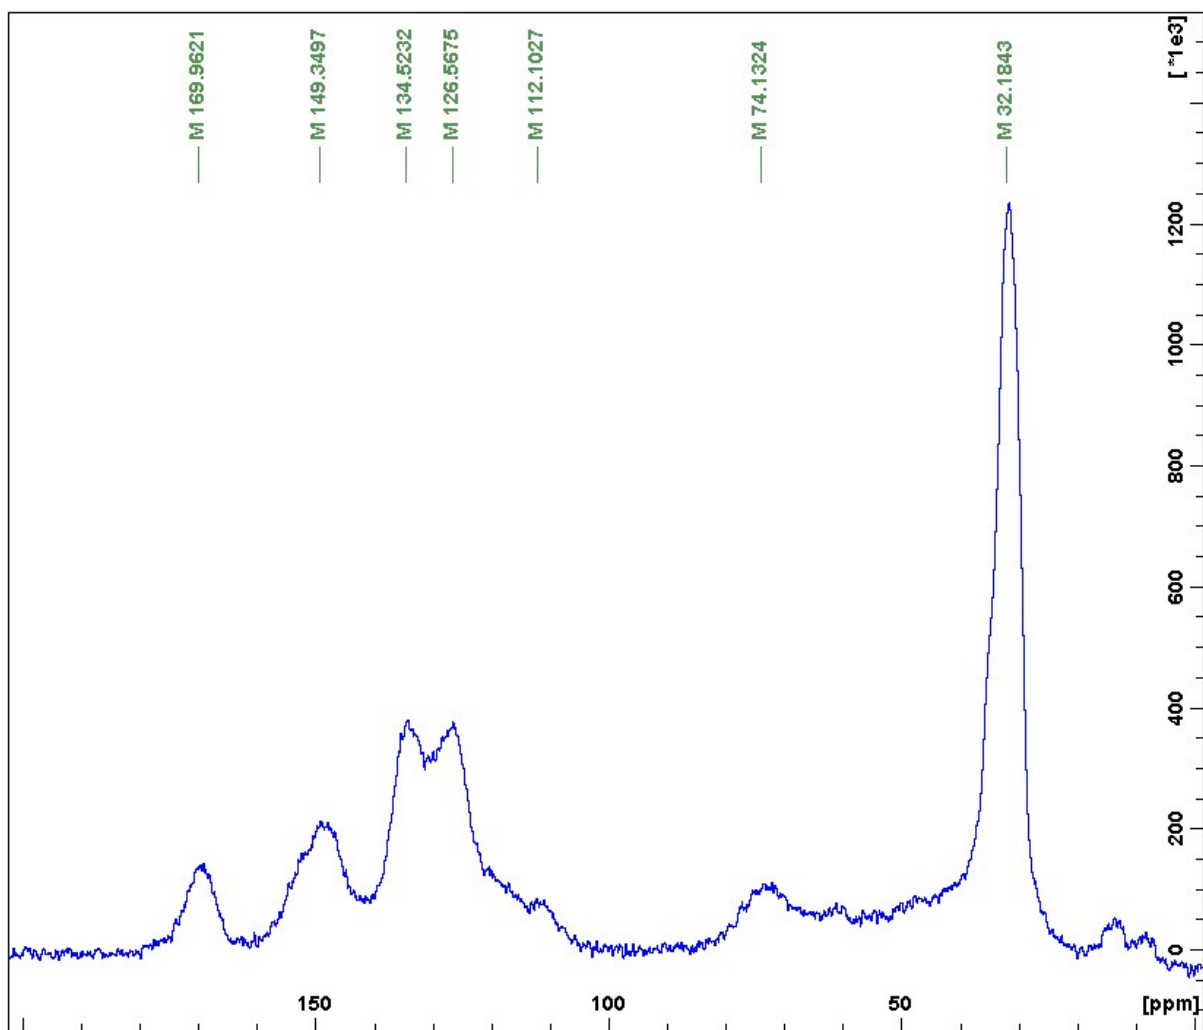

**Figure S53.**  $^{13}\text{C}\{^{19}\text{F}\}$  MAS NMR spectrum of **5** at 10 kHz spin rate and 298 K.



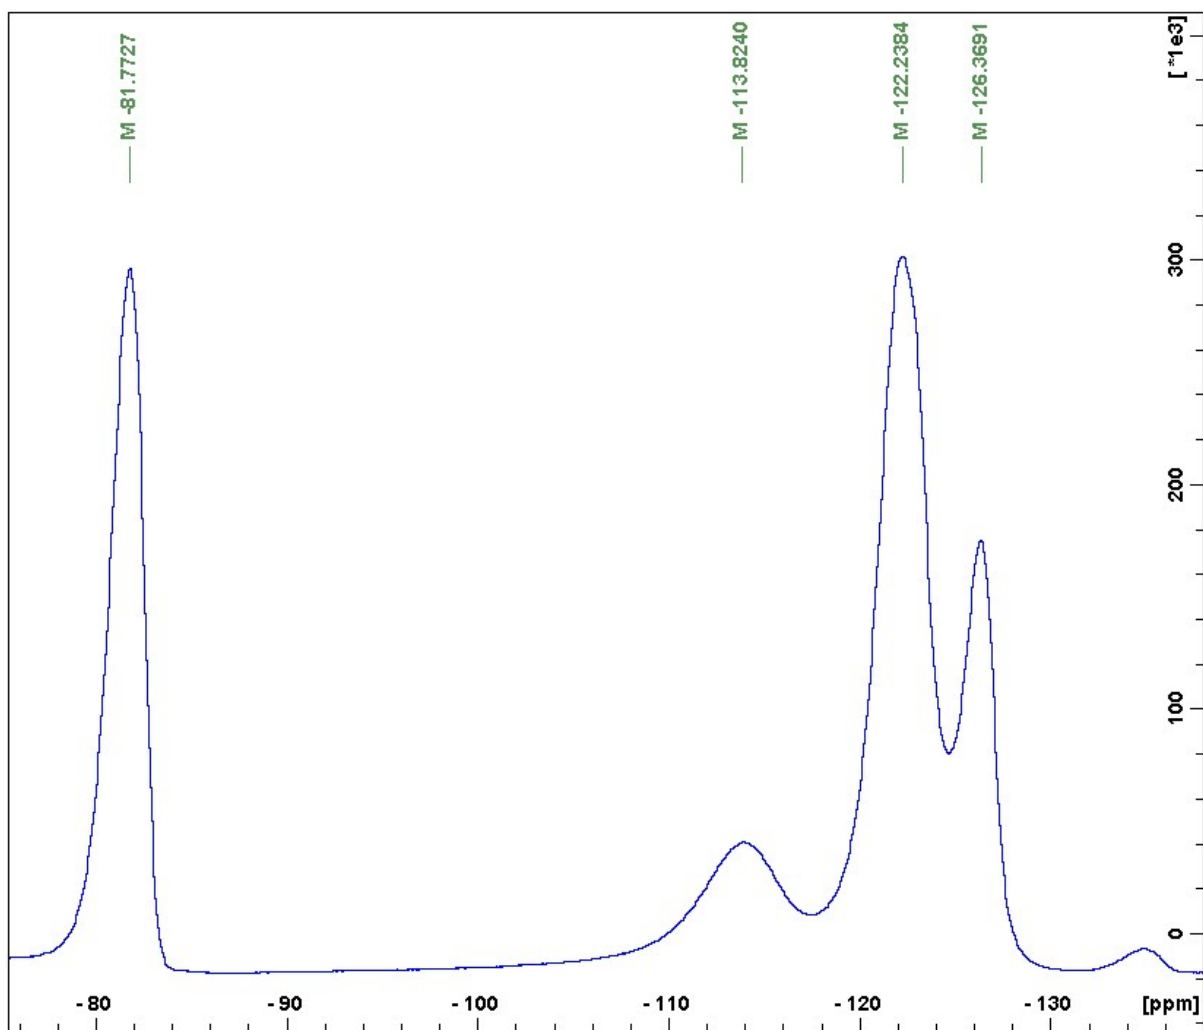

**Figure S54.**  $^{19}\text{F}\{^{13}\text{C}\}$  MAS NMR spectrum of **5** at 20 kHz spin rate and 298 K.

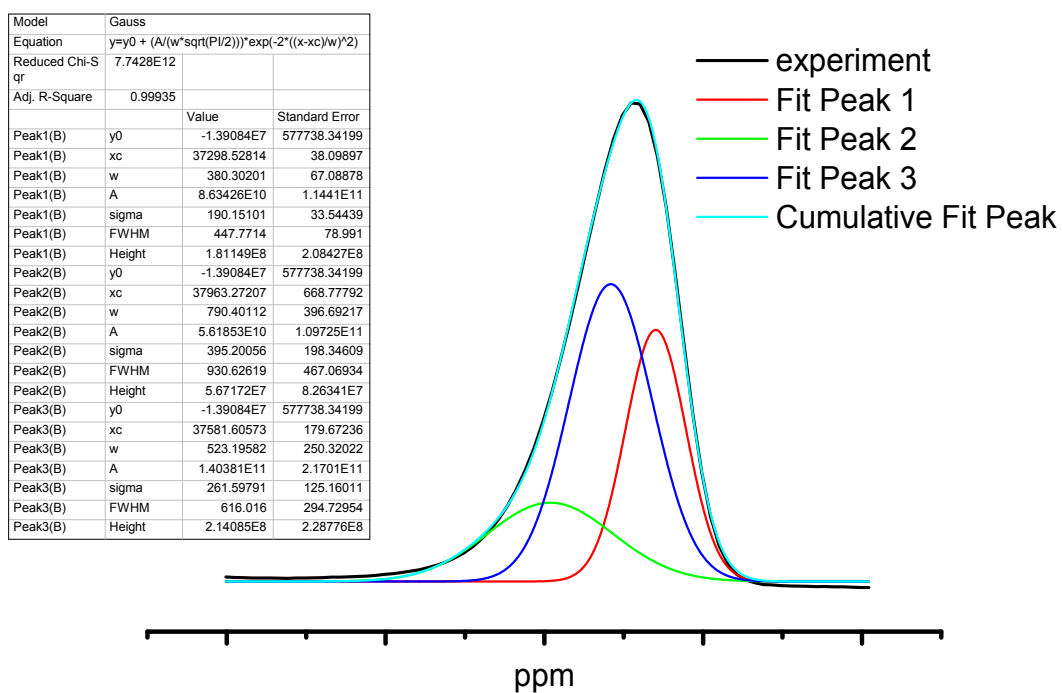

**Figure S55.** Deconvolution of  $\text{CF}_3$  resonance from the  $^{19}\text{F}\{^{13}\text{C}\}$  MAS NMR spectrum of **5**.

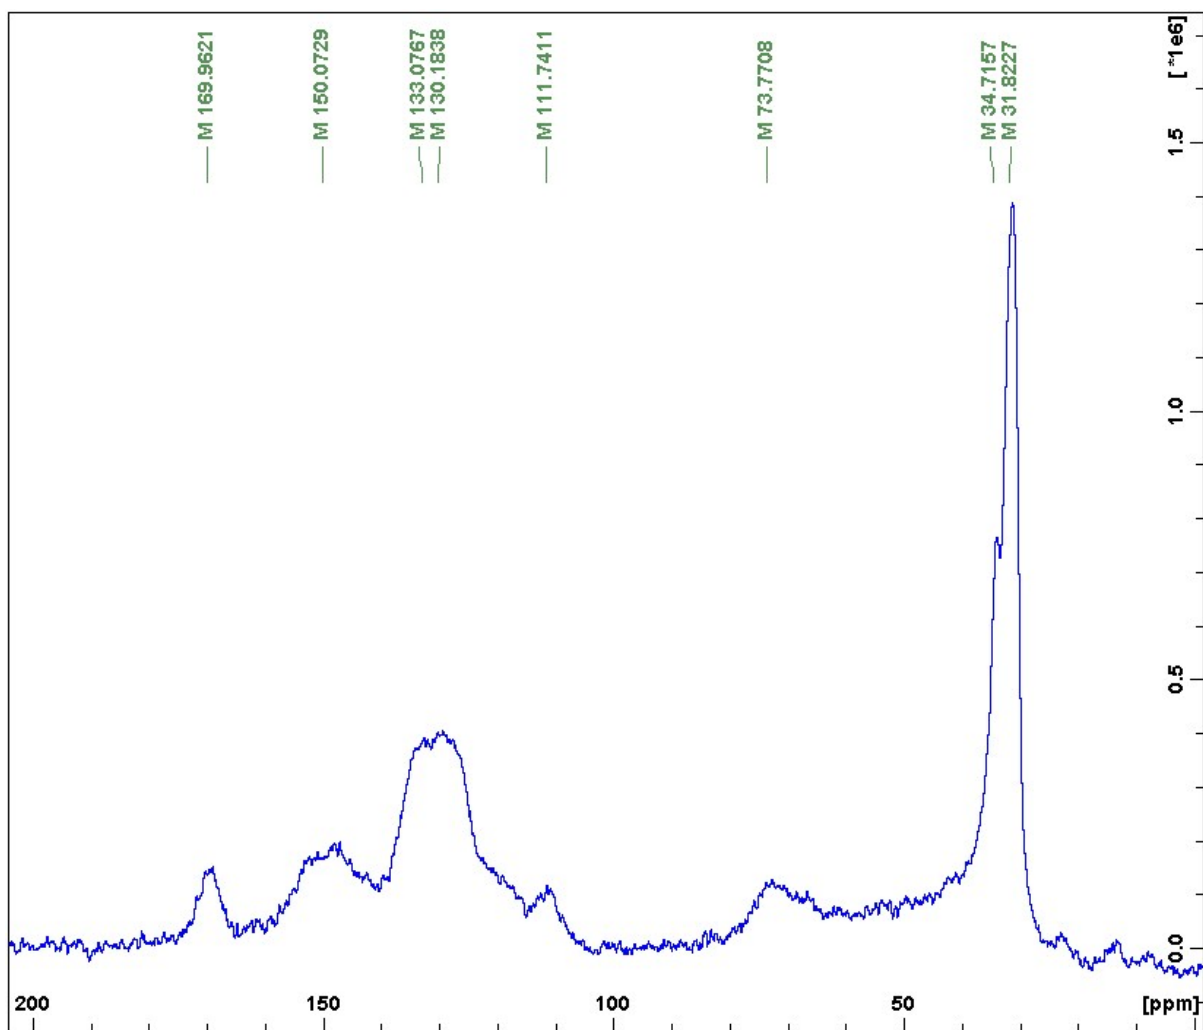

**Figure S56.**  $^{13}\text{C}\{^{19}\text{F}\}$  MAS NMR spectrum of **5:1PFOA** at 10 kHz spin rate and 298 K.

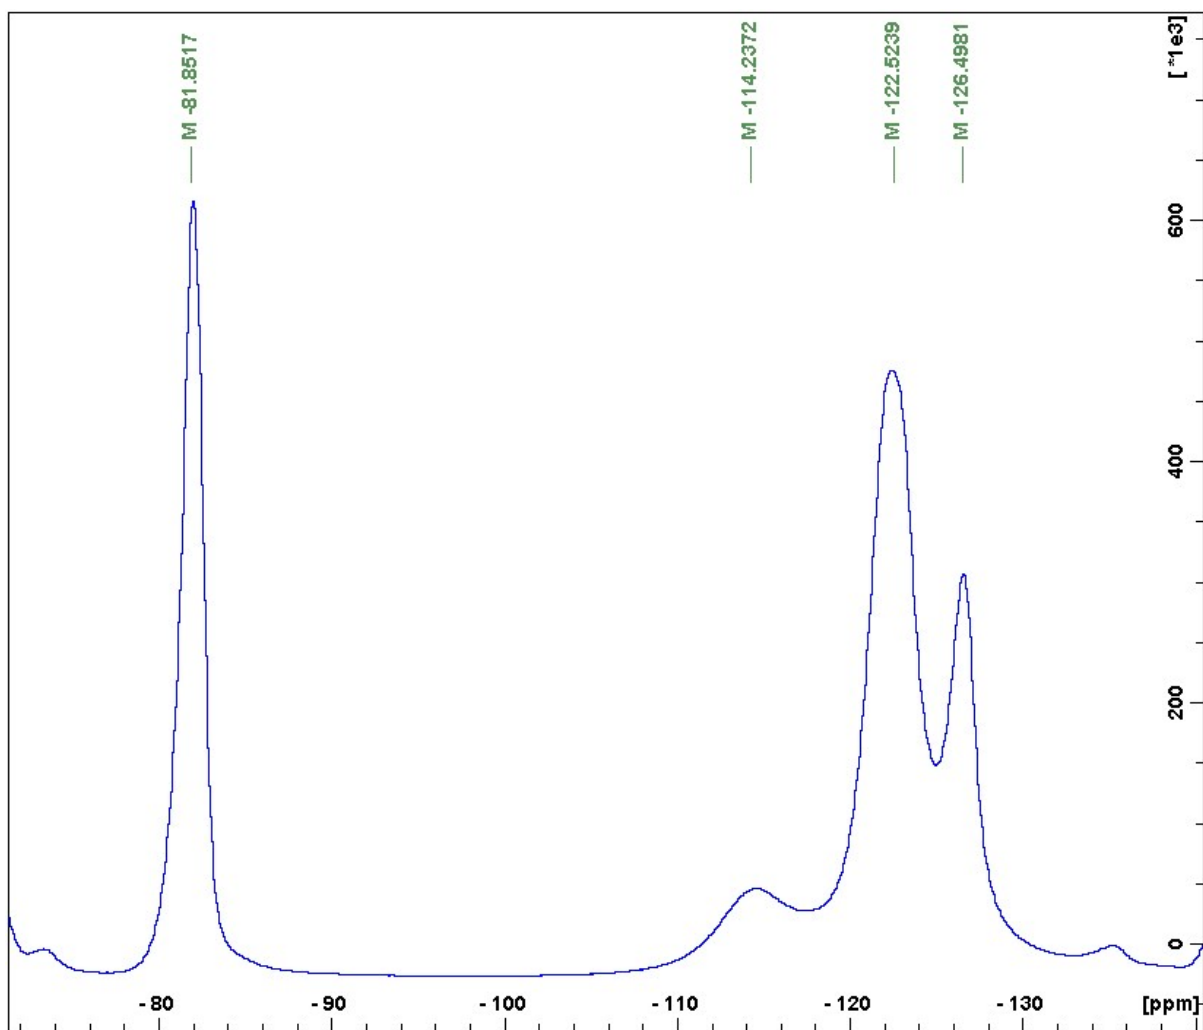

**Figure S57.**  $^{19}\text{F}\{^{13}\text{C}\}$  MAS NMR spectrum of **5:1PFOA** at 20 kHz spin rate and 298 K.

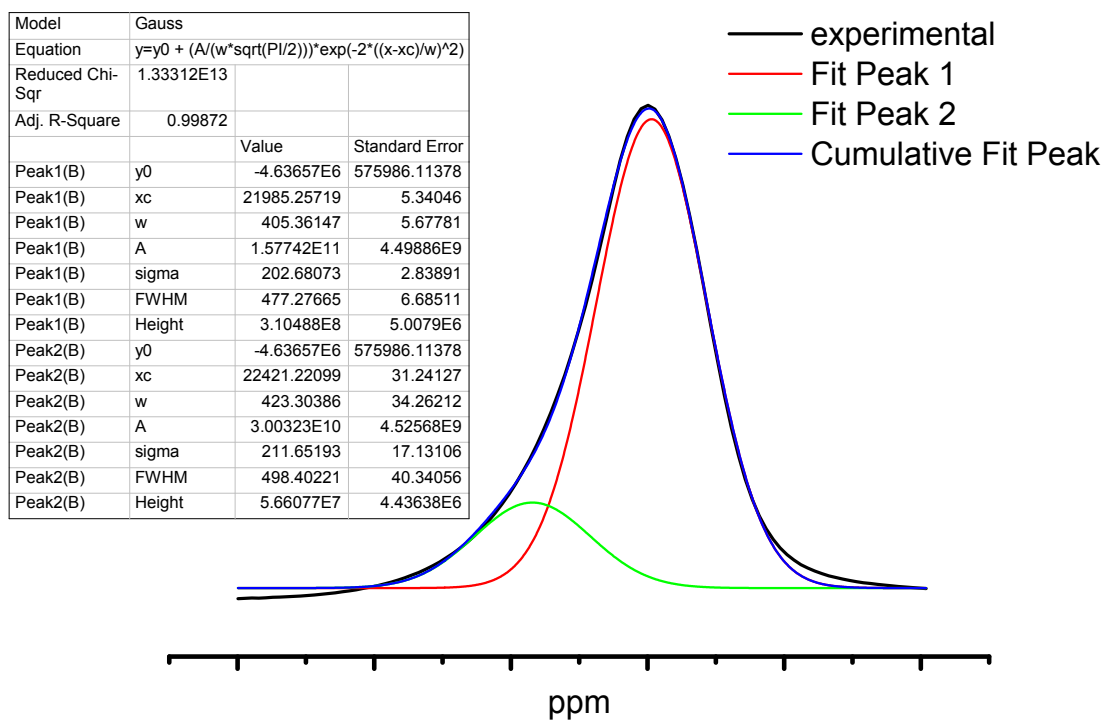

**Figure S58.** Deconvolution of  $\text{CF}_3$  resonance from the  $^{19}\text{F}\{^{13}\text{C}\}$  MAS NMR spectrum of 5:1PFOA.

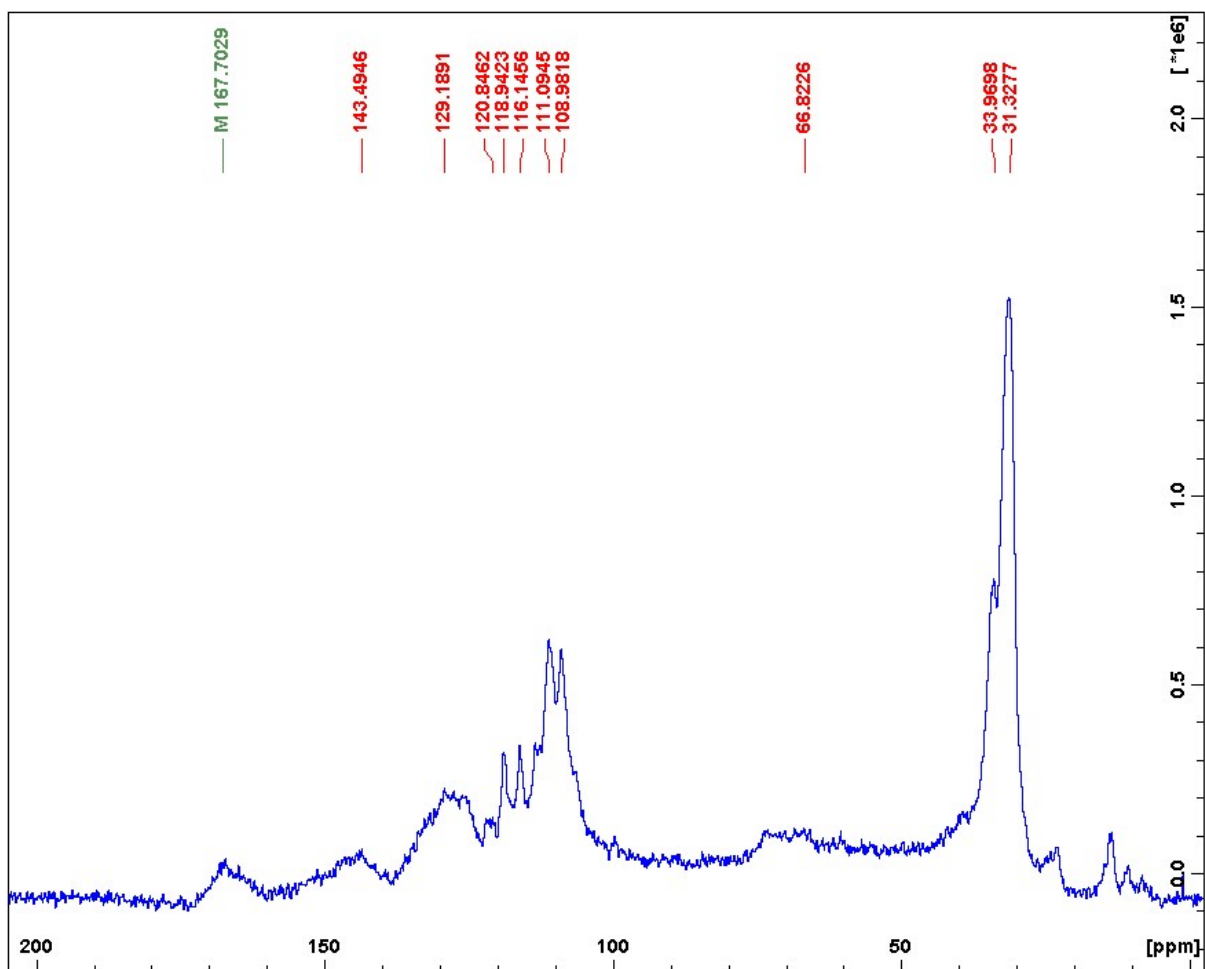

**Figure S59.**  $^{13}\text{C}\{^{19}\text{F}\}$  MAS NMR spectrum of **6** at 10 kHz spin rate and 298 K.

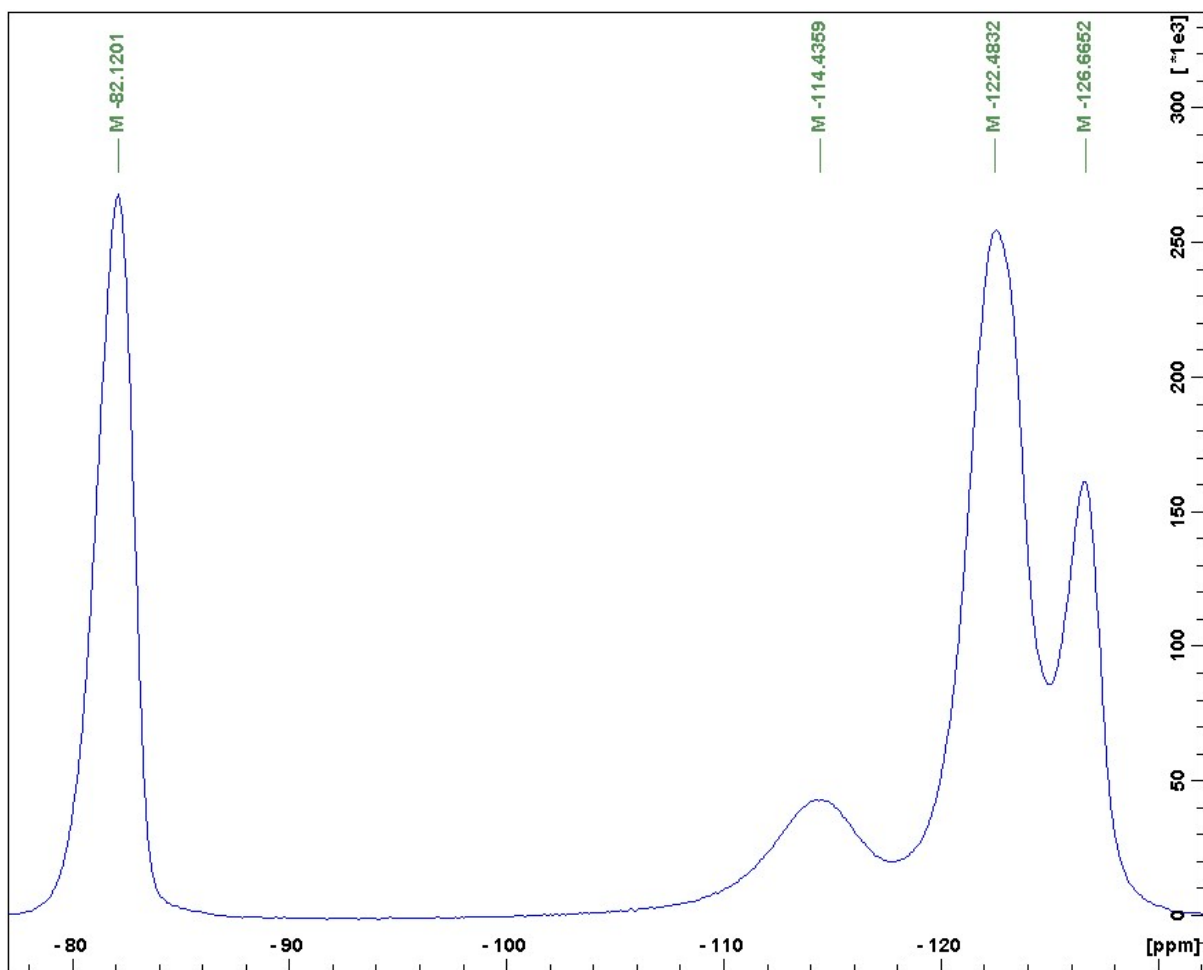

**Figure S60.**  $^{19}\text{F}\{^{13}\text{C}\}$  MAS NMR spectrum of **6** at 20 kHz spin rate and 298 K.

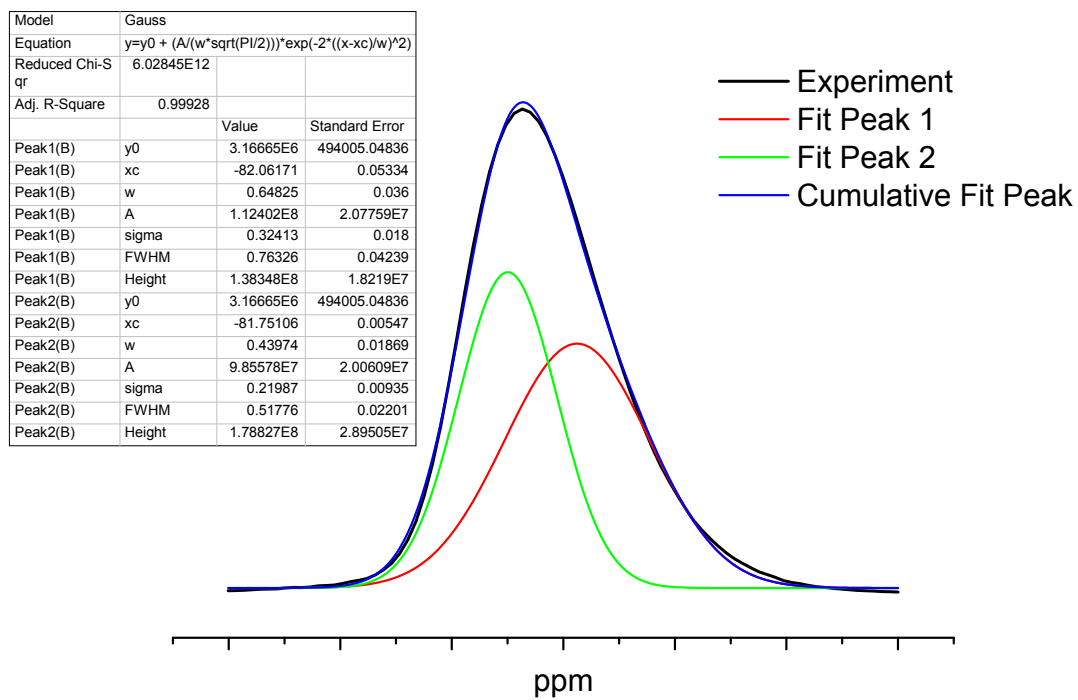

**Figure S61.** Deconvolution of  $\text{CF}_3$  resonance from the  $^{19}\text{F}\{^{13}\text{C}\}$  MAS NMR spectrum of **6**.



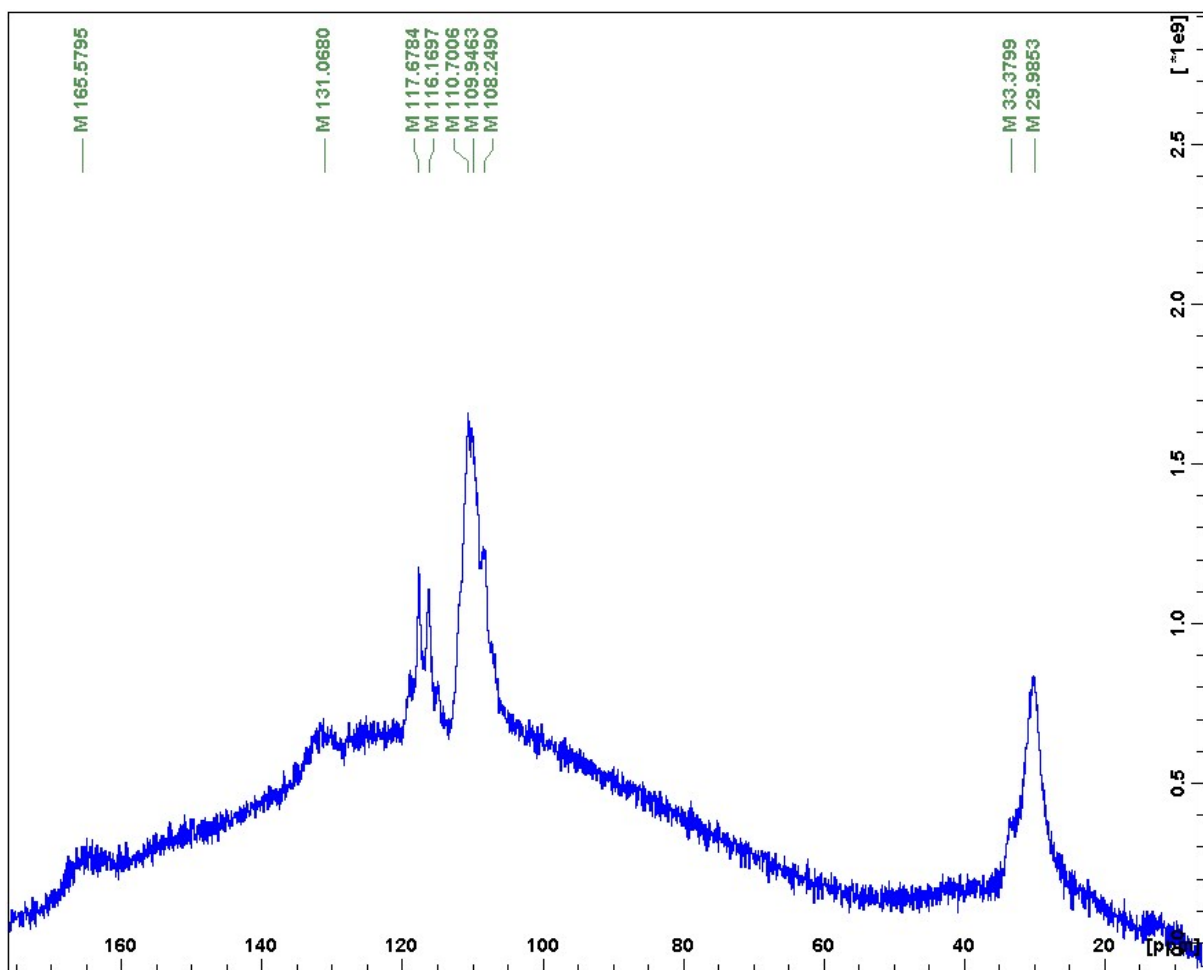

**Figure S62.**  $^{13}\text{C}\{^{19}\text{F}\}$  MAS NMR spectrum of 6:1PFOA at 10 kHz spin rate and 298 K.

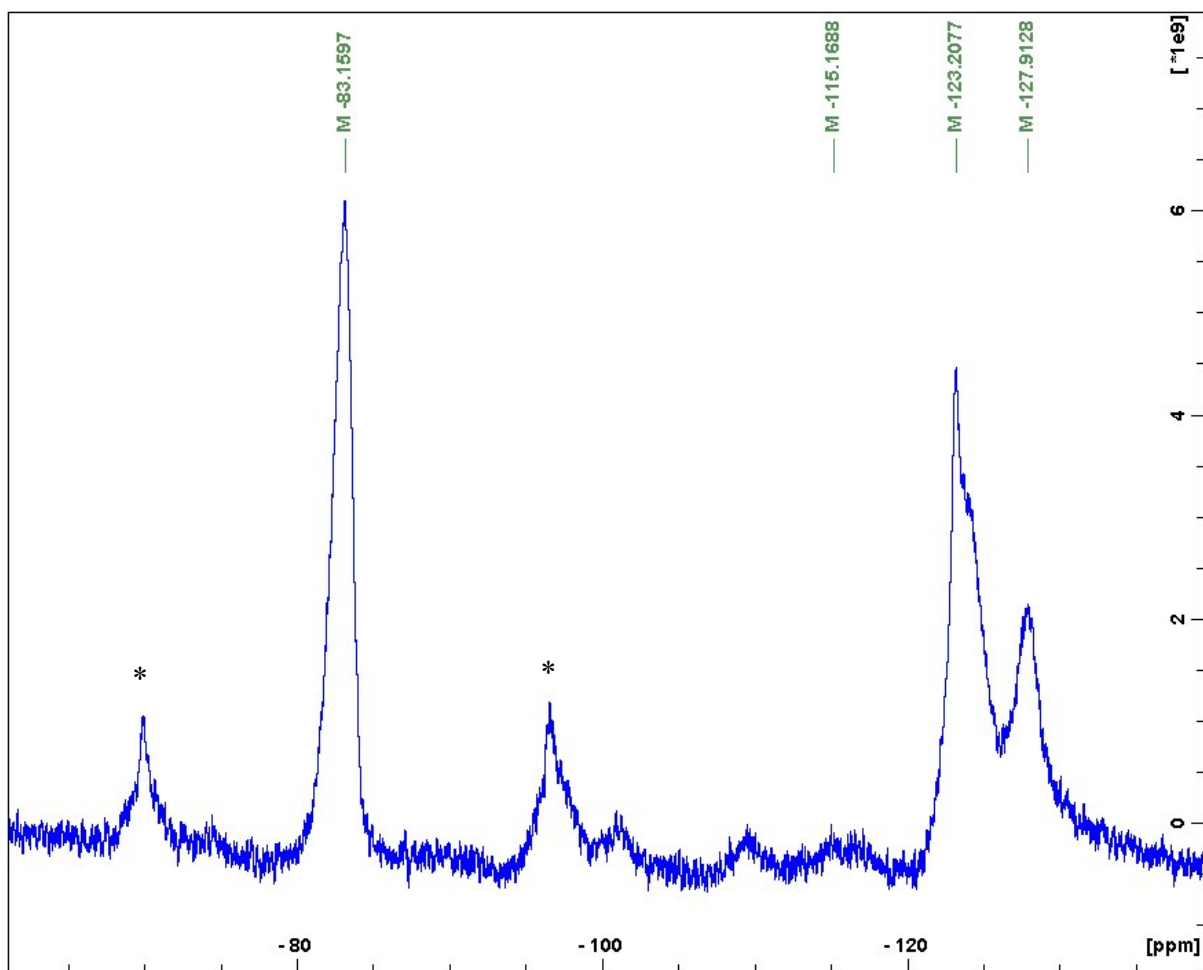

**Figure S63.**  $^{19}\text{F}\{^{13}\text{C}\}$  MAS NMR spectrum of 6:1PFOA at 20 kHz spin rate and 298 K (\* indicates spinning side bands).

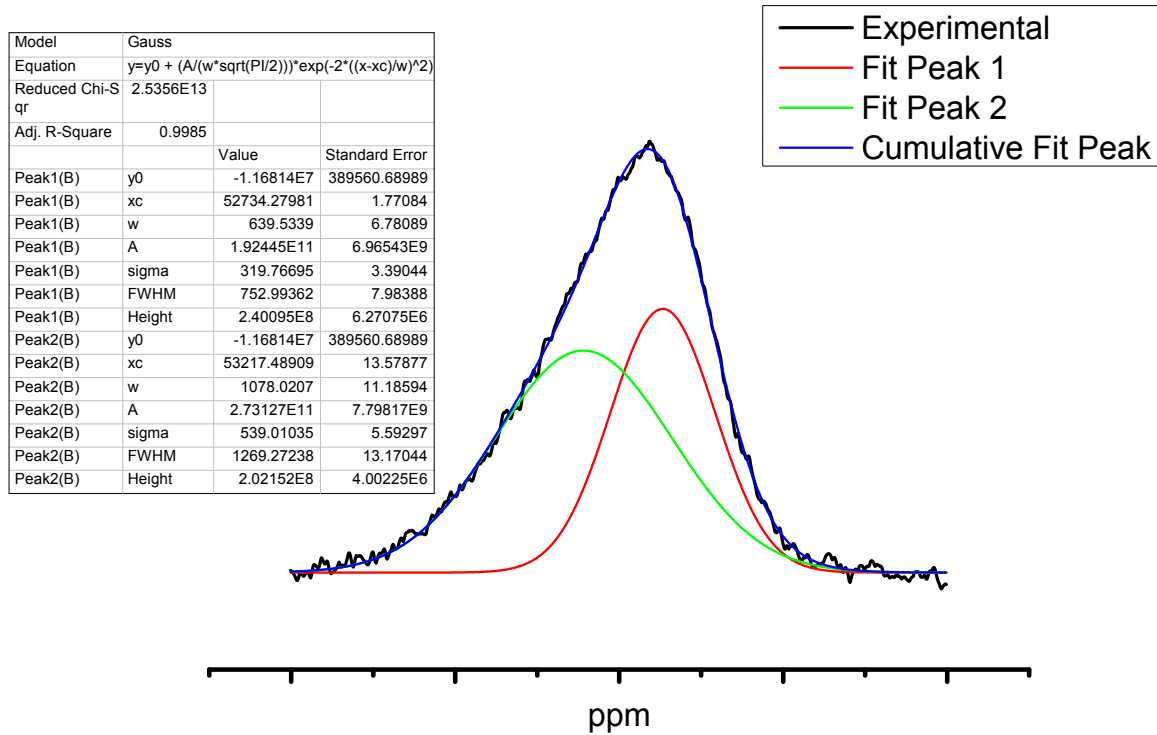

**Figure S64.** Deconvolution of  $\text{CF}_3$  resonance from the  $^{19}\text{F}\{^{13}\text{C}\}$  MAS NMR spectrum of **6:1PFOA**.

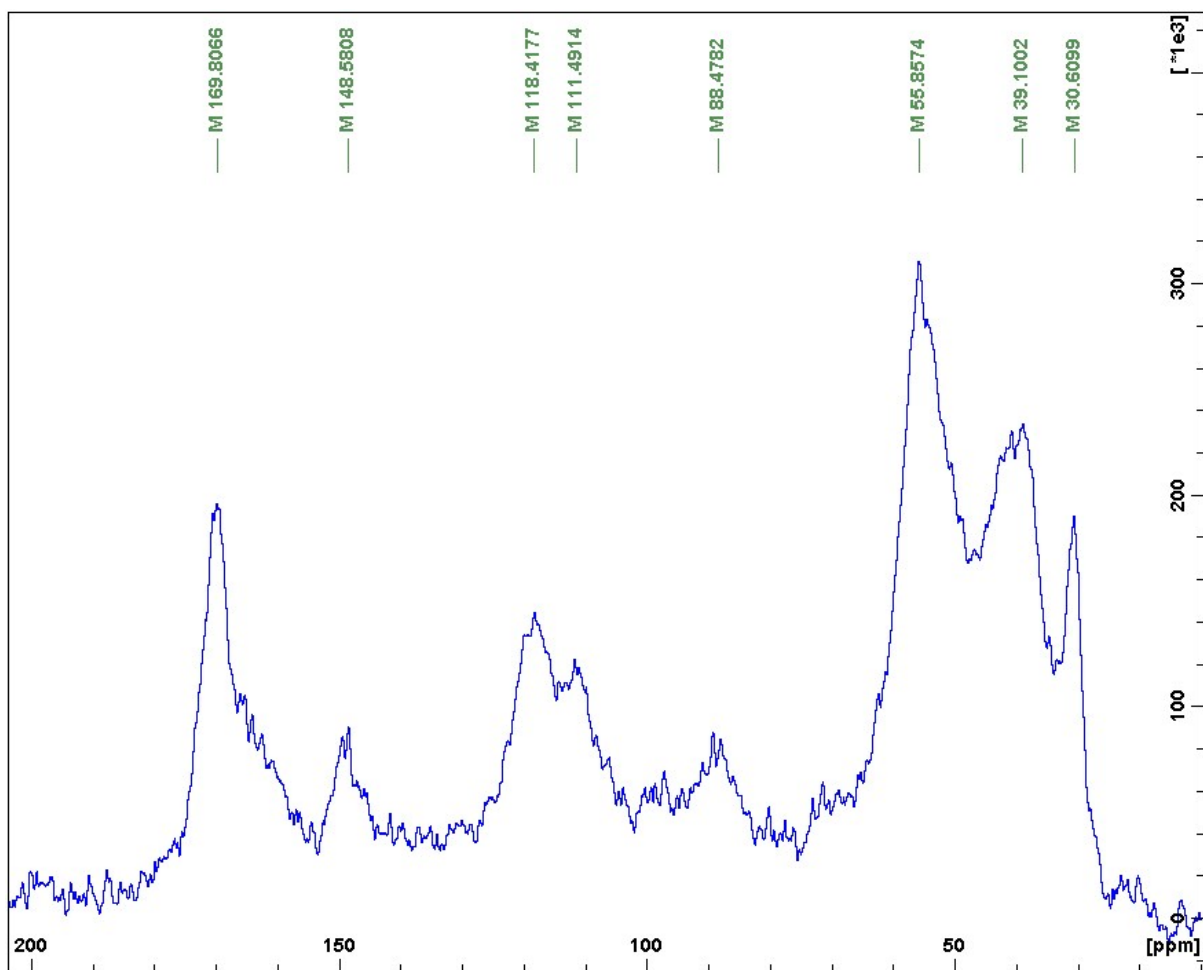

**Figure S65.**  $^{13}\text{C}\{^{19}\text{F}\}$  MAS NMR spectrum of **8** at 5 kHz spin rate and 298 K.

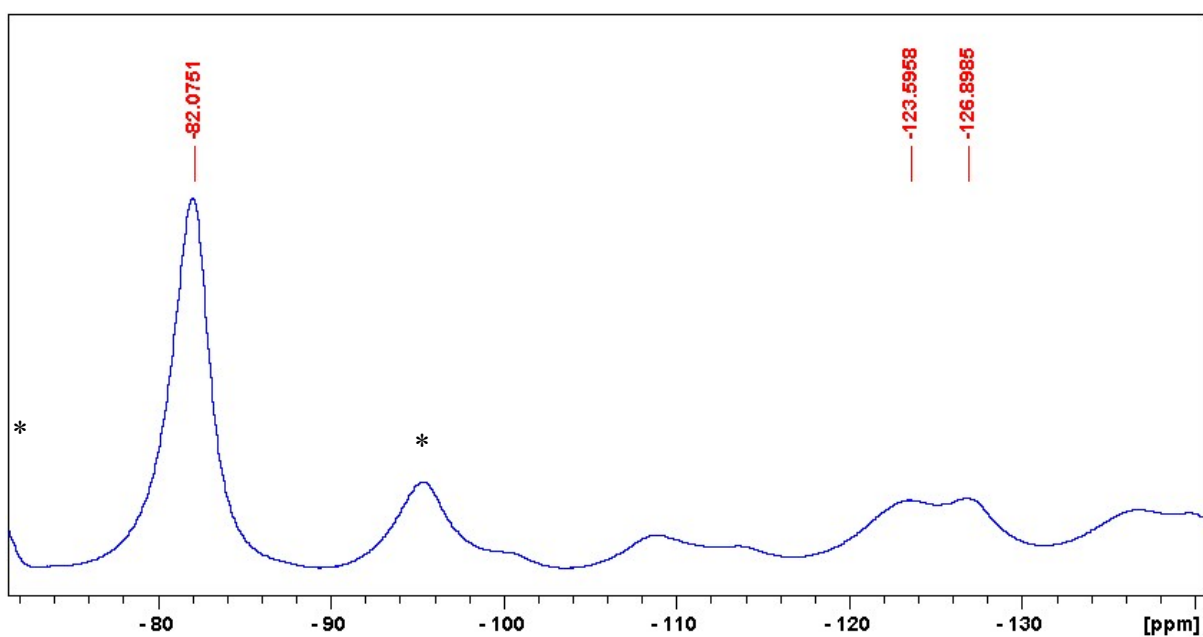

**Figure S66.**  $^{19}\text{F}\{^{13}\text{C}\}$  MAS NMR spectrum of **8** at 5 kHz spin rate and 298 K (\* indicates spinning side bands).

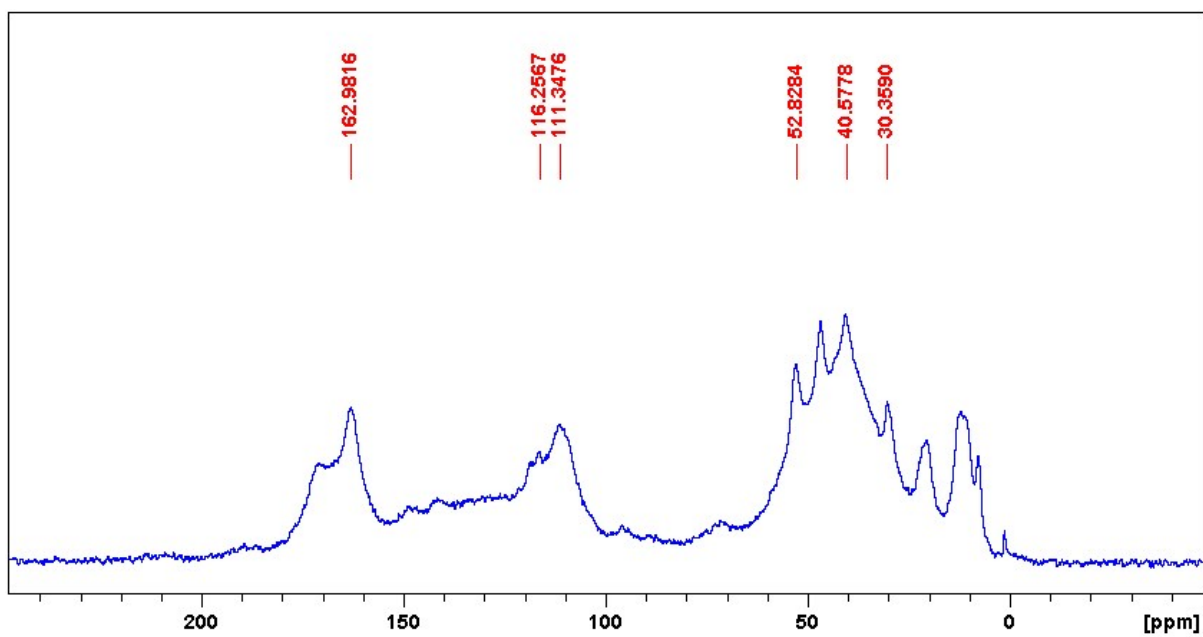

**Figure S67.**  $^{13}\text{C}\{^{19}\text{F}\}$  MAS NMR spectrum of **8:1PFOA** at 10 kHz spin rate and 298 K.

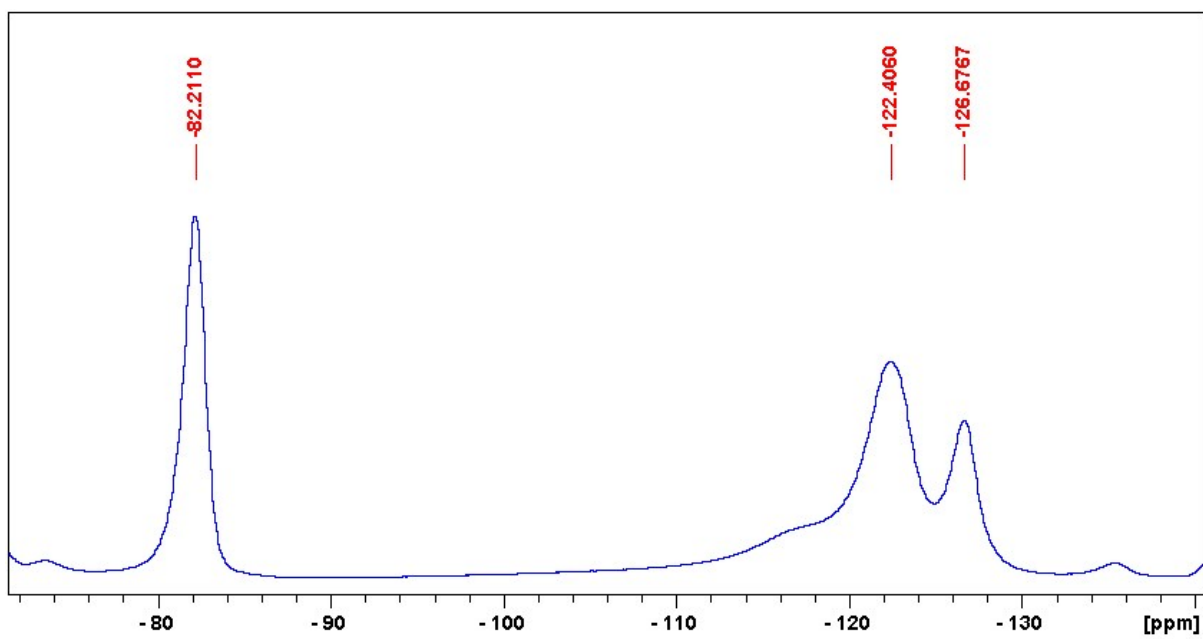

**Figure S68.**  $^{19}\text{F}\{^{13}\text{C}\}$  MAS NMR spectrum of **8:2PFOA** at 20 kHz spin rate and 298 K.

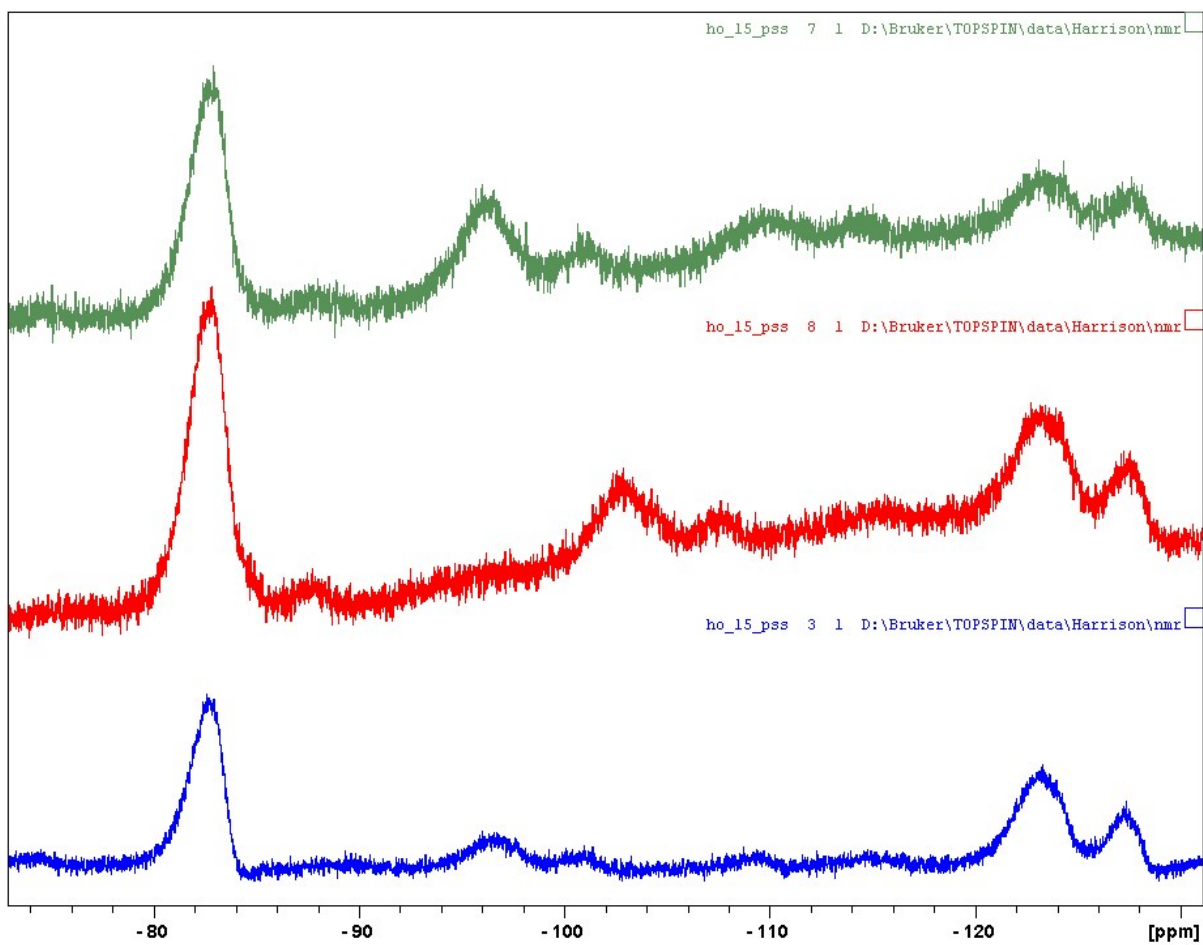

**Figure S69.**  $^{19}\text{F}\{^{13}\text{C}\}$  MAS NMR spectrum of **6** at variable spin rates 10, 15, 20 kHz (top to bottom) and 298 K.

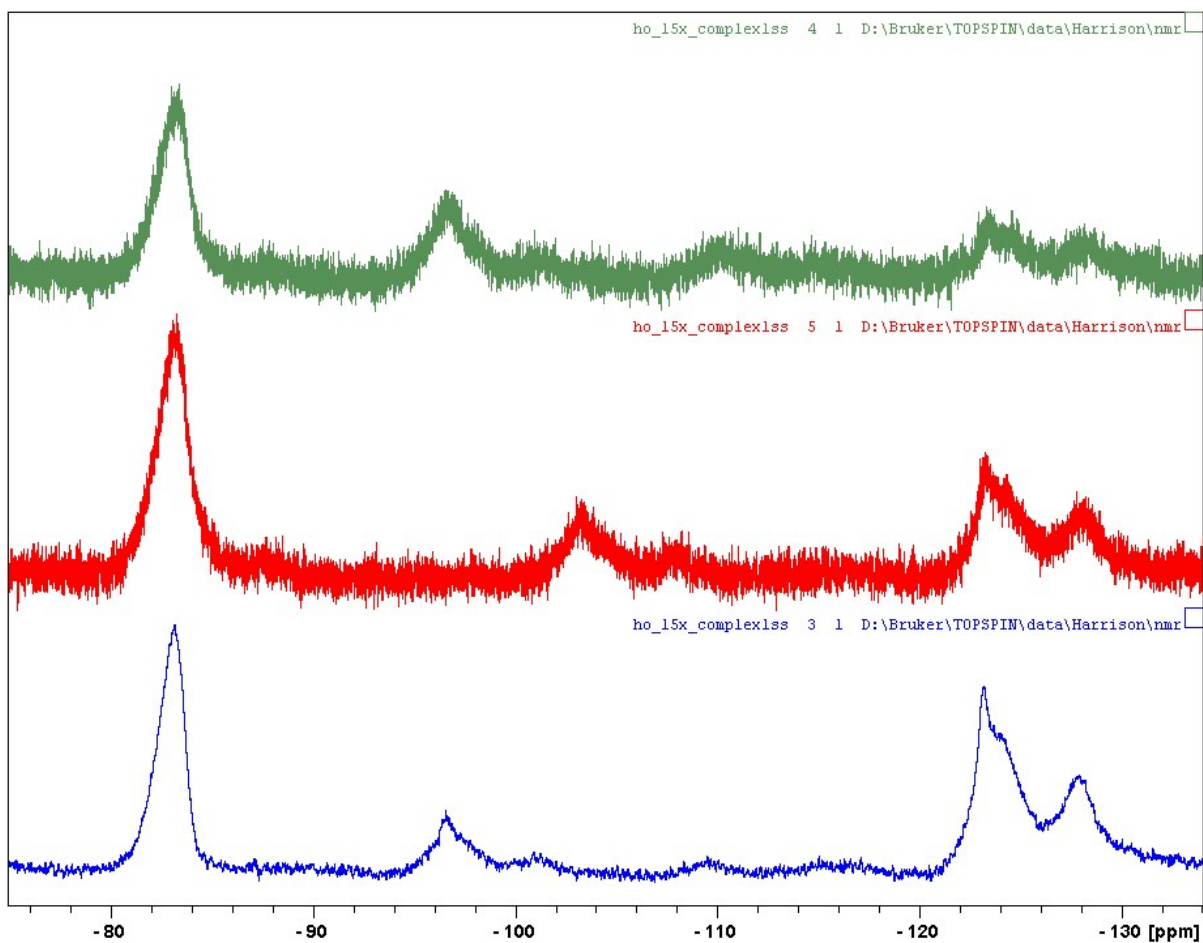

**Figure S70.**  $^{19}\text{F}\{^{13}\text{C}\}$  MAS NMR spectrum of 6:PFOA at variable spin rates 10, 15, 20 kHz (top to bottom) and 298 K.

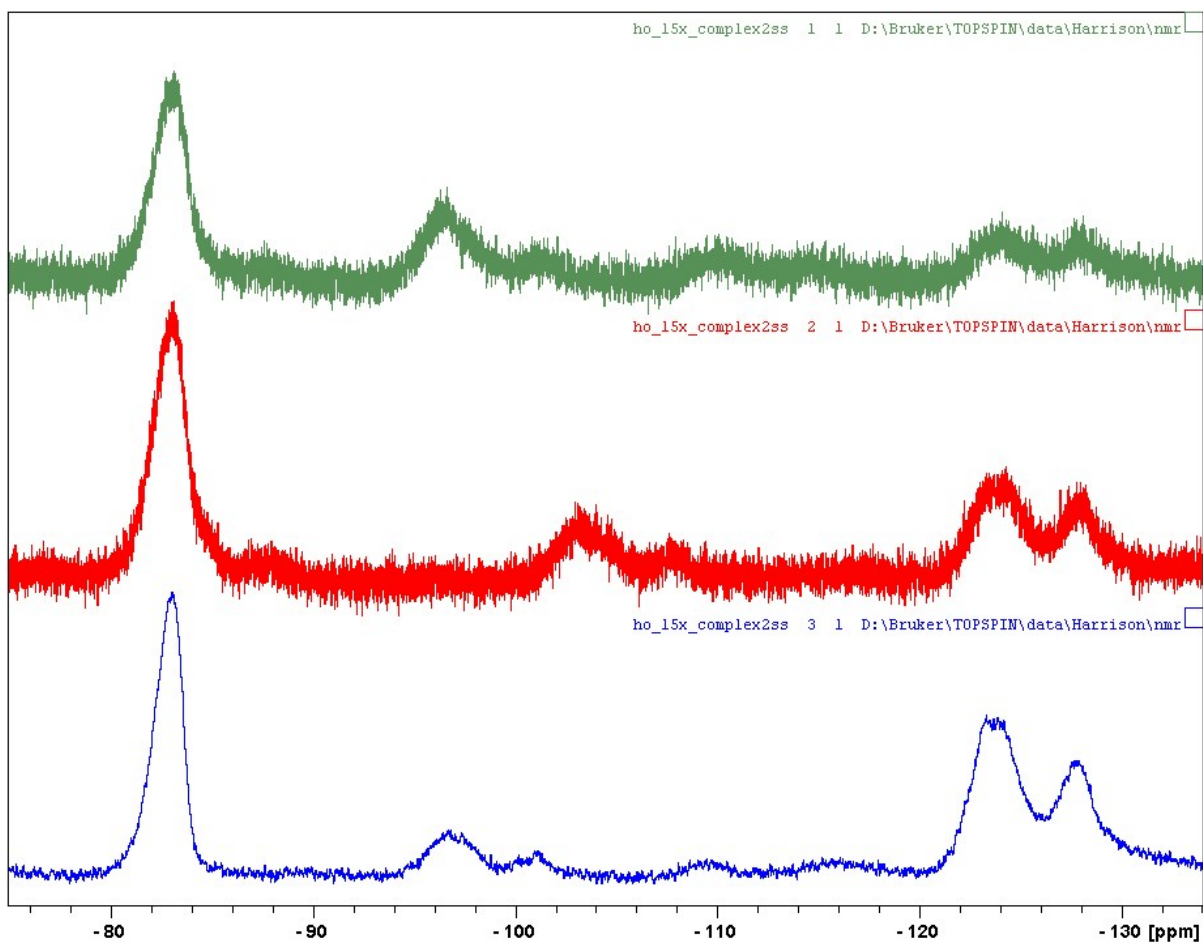

**Figure S71.**  $^{19}\text{F}\{^{13}\text{C}\}$  MAS NMR spectrum of 6:2PFOA at variable spin rates 10, 15, 20 kHz (top to bottom) and 298 K.



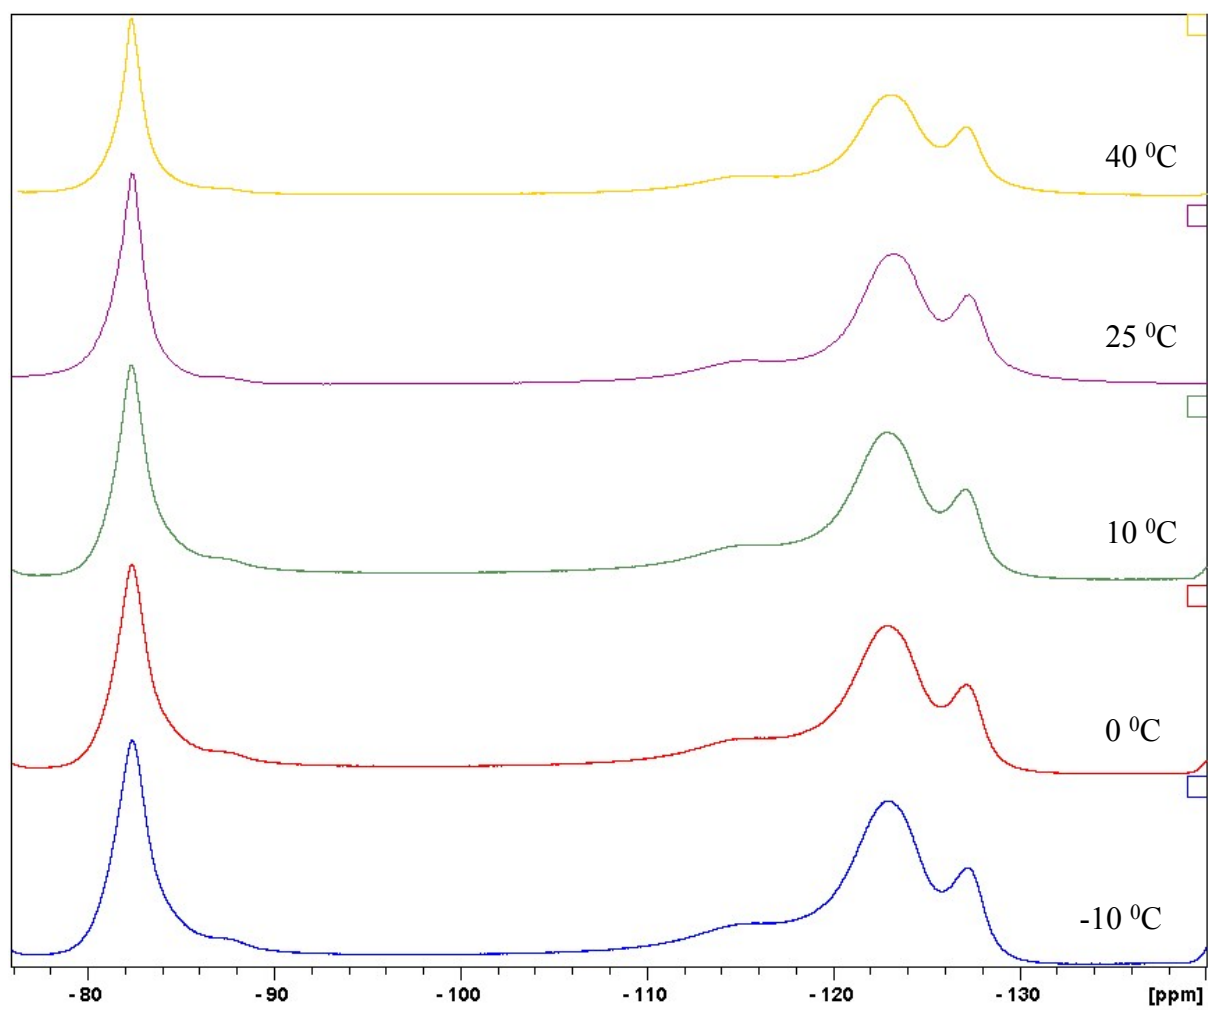

**Figure S72.** Variable temperature  $^{19}\text{F}\{^{13}\text{C}\}$  MAS NMR spectra of 5:1PFOA.

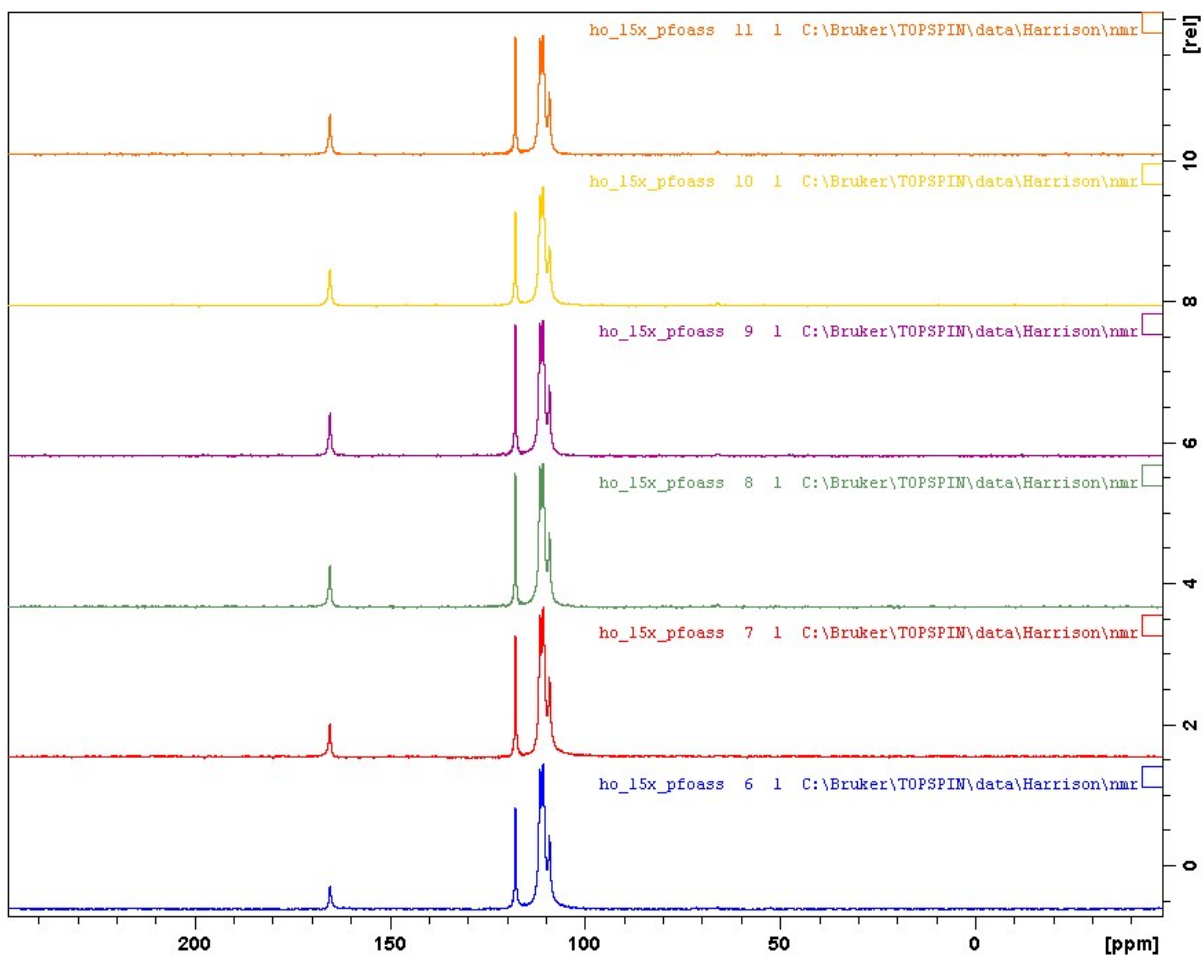

**Figure S73.**  $^{19}\text{F} \rightarrow ^{13}\text{C}$  CP/MAS NMR spectrum of PFOA with a contact times 1, 2, 4, 6, 8, 10 ms (bottom to top).

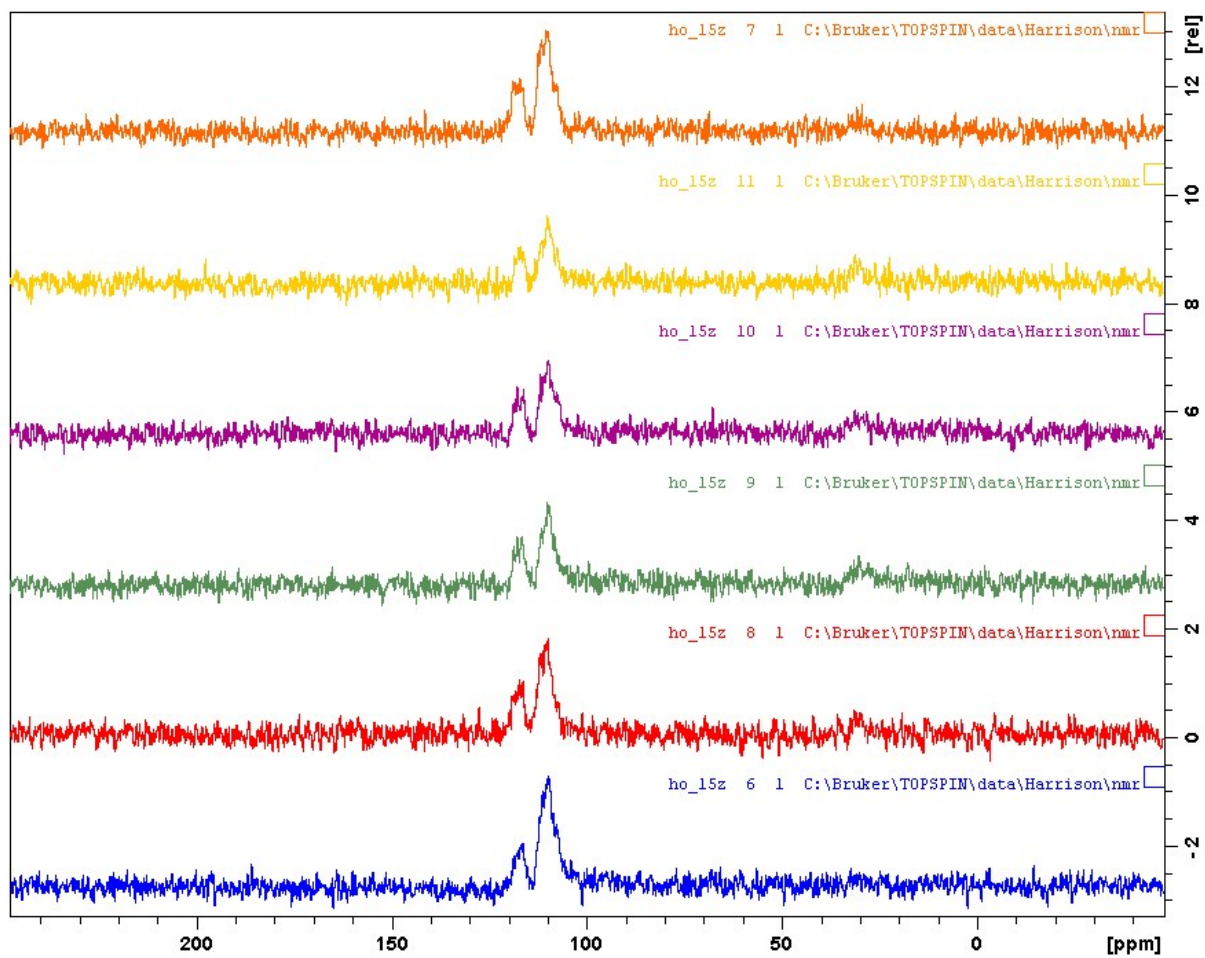

**Figure S74.**  $^{19}\text{F} \rightarrow ^{13}\text{C}$  CP/MAS NMR spectrum of **5** with a contact times 1, 2, 4, 6, 8, 10 ms (bottom to top).

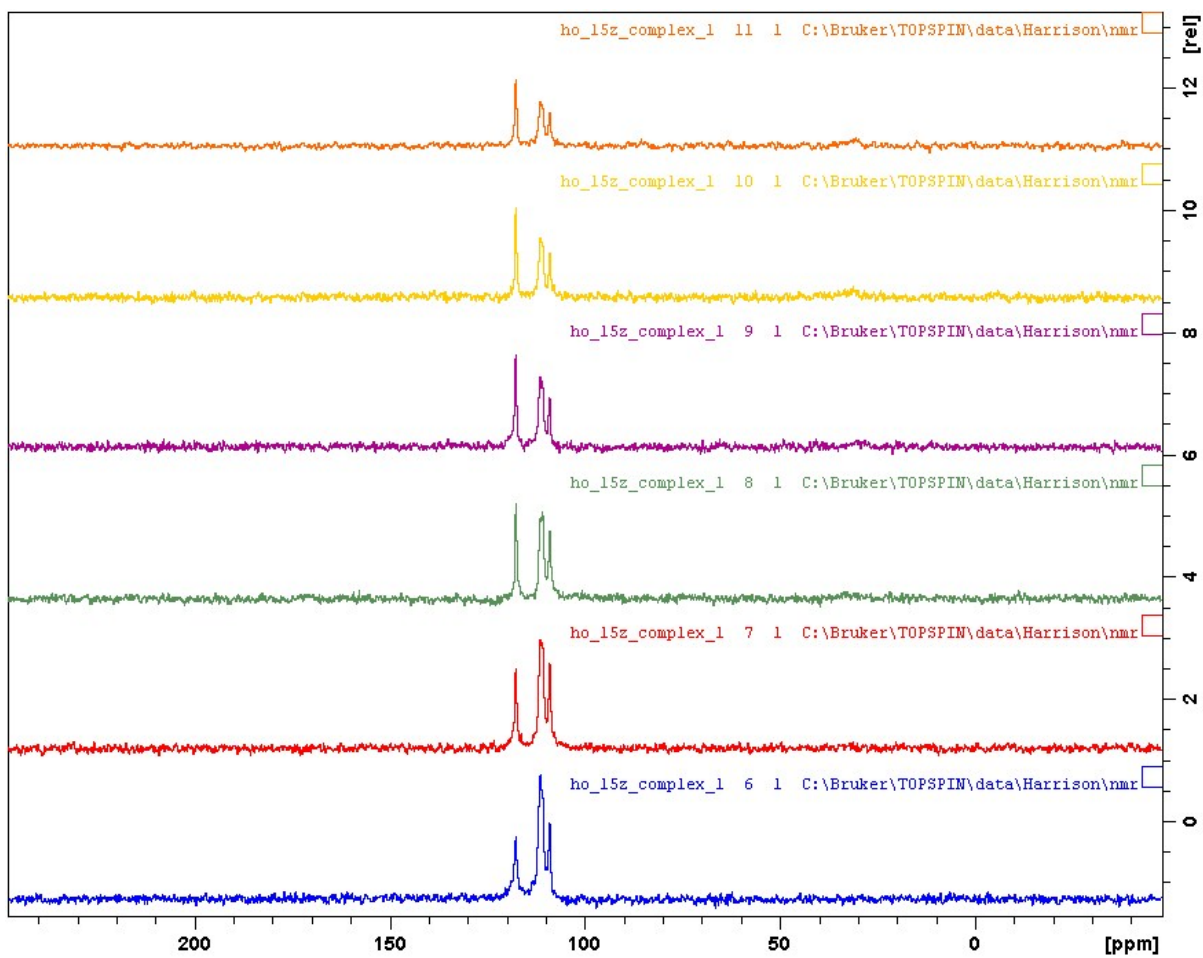

**Figure S75.**  $^{19}\text{F} \rightarrow ^{13}\text{C}$  CP/MAS NMR spectrum of 5:1PFOA with a contact times 1, 2, 4, 6, 8, 10 ms (bottom to top).

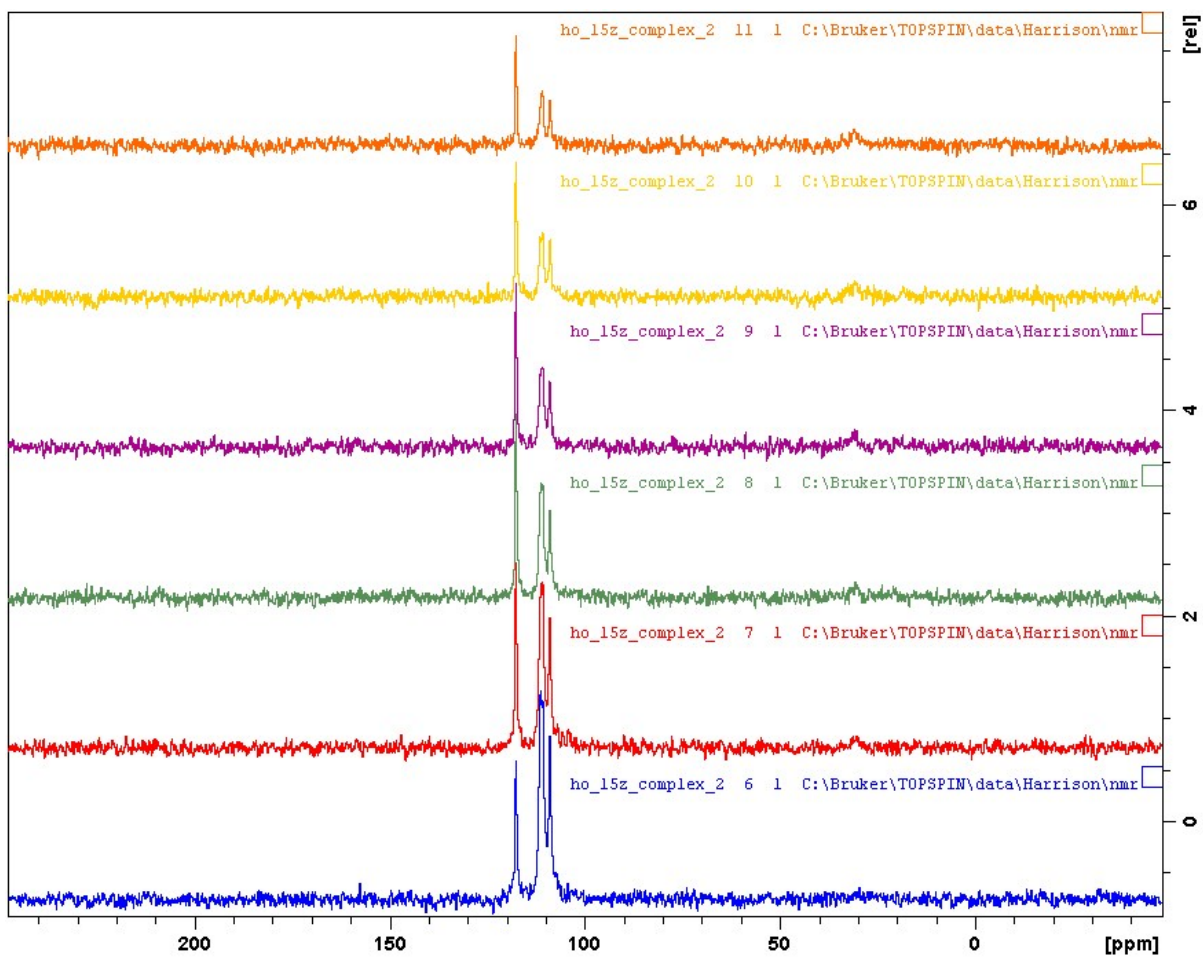

**Figure S76.**  $^{19}\text{F} \rightarrow ^{13}\text{C}$  CP/MAS NMR spectrum of 5:2PFOA with a contact times 1, 2, 4, 6, 8, 10 ms (bottom to top).

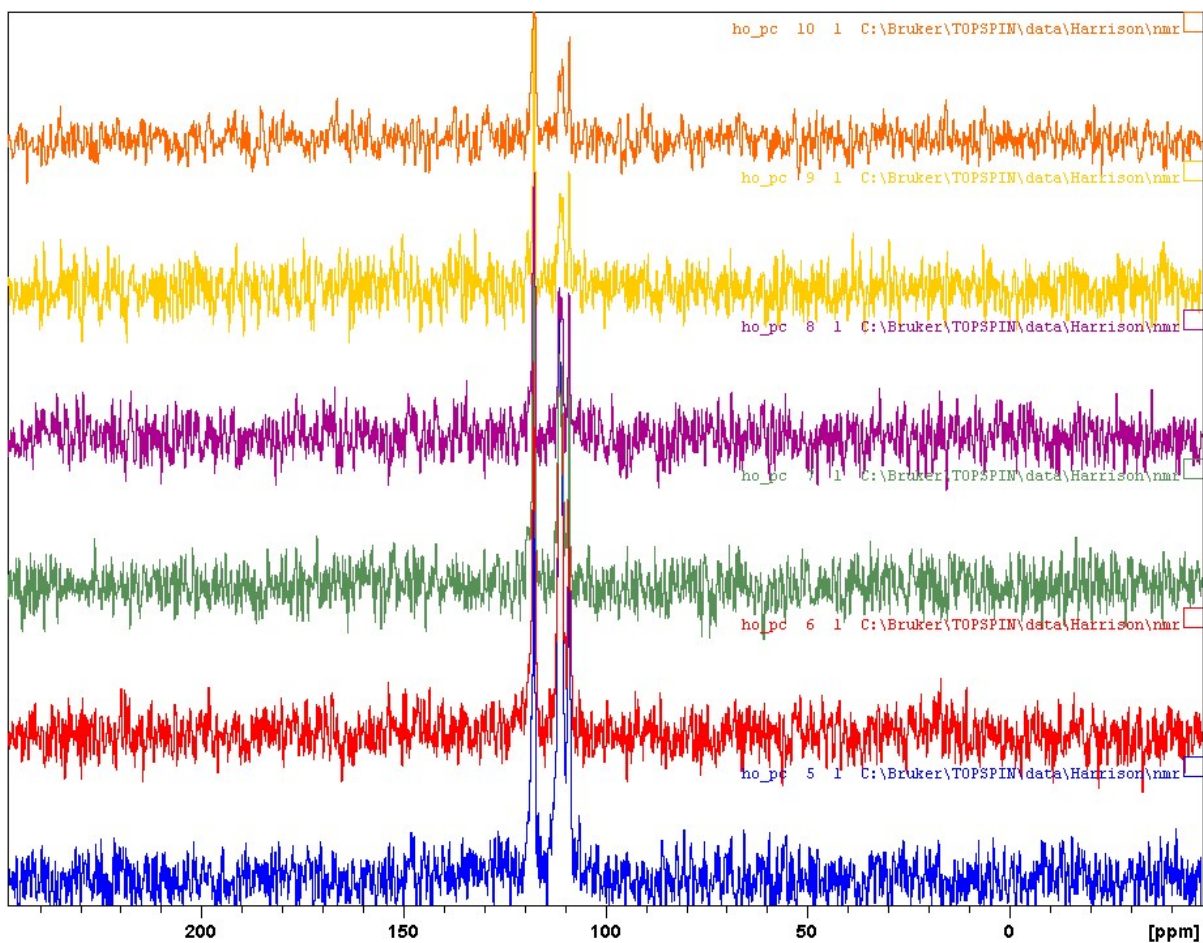

**Figure S77.**  $^{19}\text{F} \rightarrow ^{13}\text{C}$  CP/MAS NMR spectrum of **6** with a contact times 1, 2, 4, 6, 8, 10 ms.



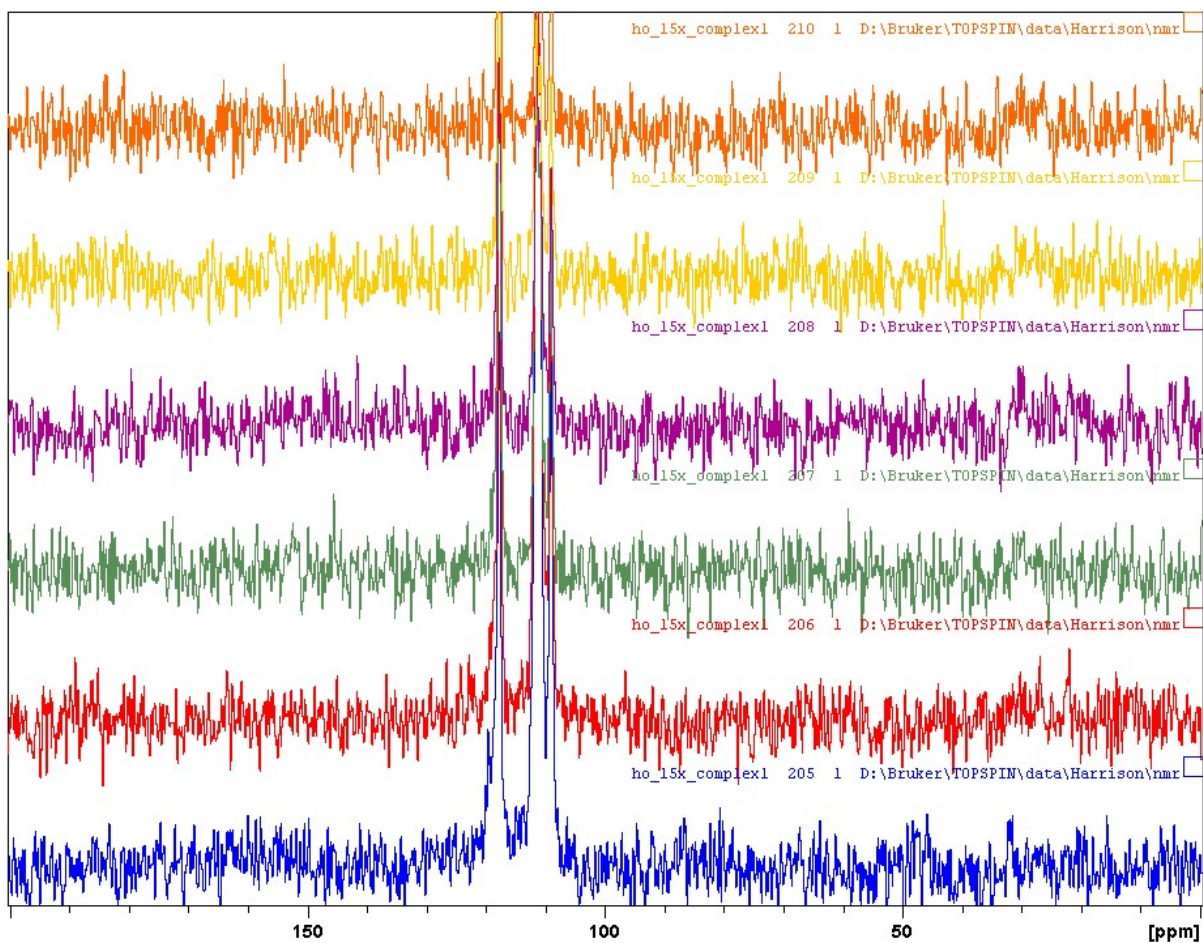

**Figure S78.**  $^{19}\text{F} \rightarrow ^{13}\text{C}$  CP/MAS NMR spectrum of 6:PFOA with a contact times 1, 2, 4, 6, 8, 10 ms.



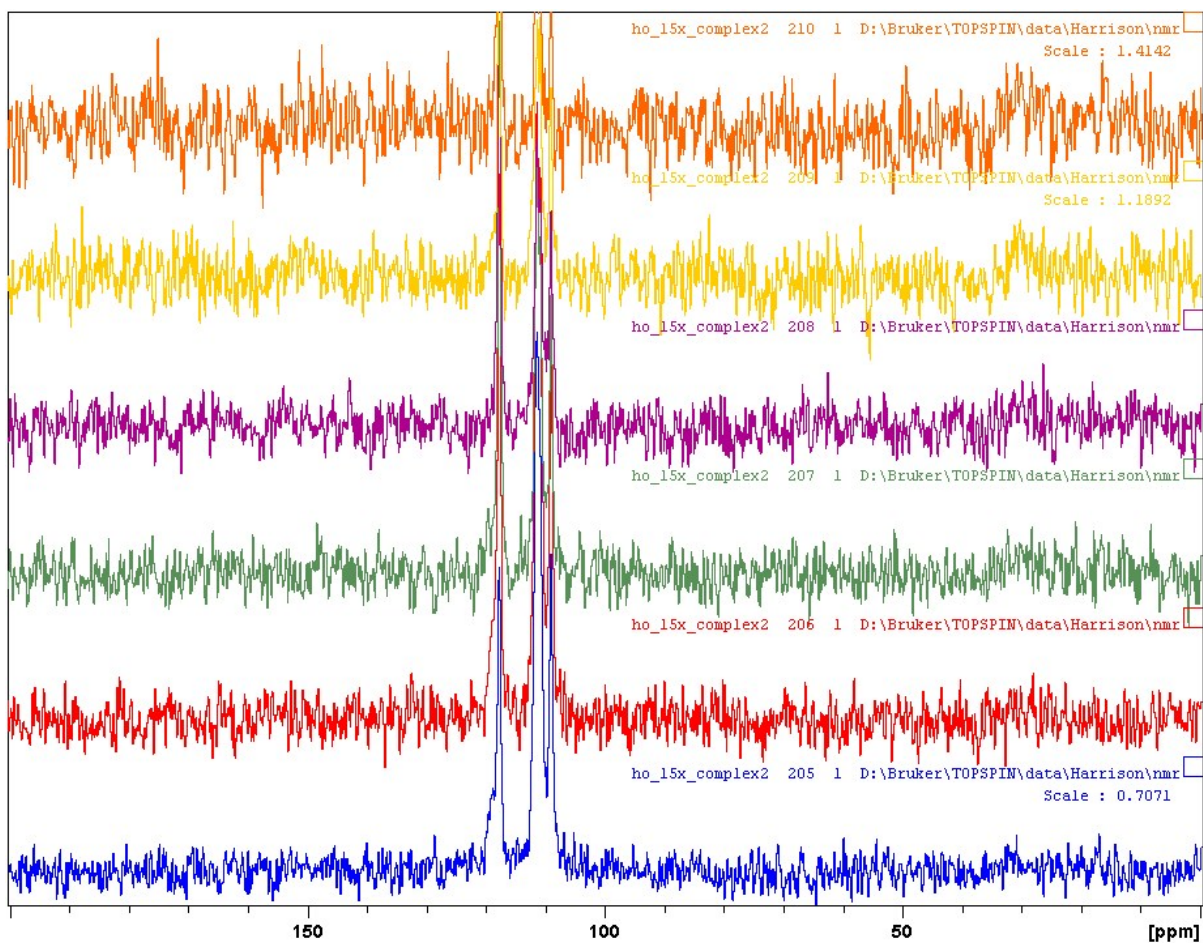

**Figure S79.**  $^{19}\text{F} \rightarrow ^{13}\text{C}$  CP/MAS NMR spectrum of **6:2PFOA** with a contact times 1, 2, 4, 6, 8, 10 ms.

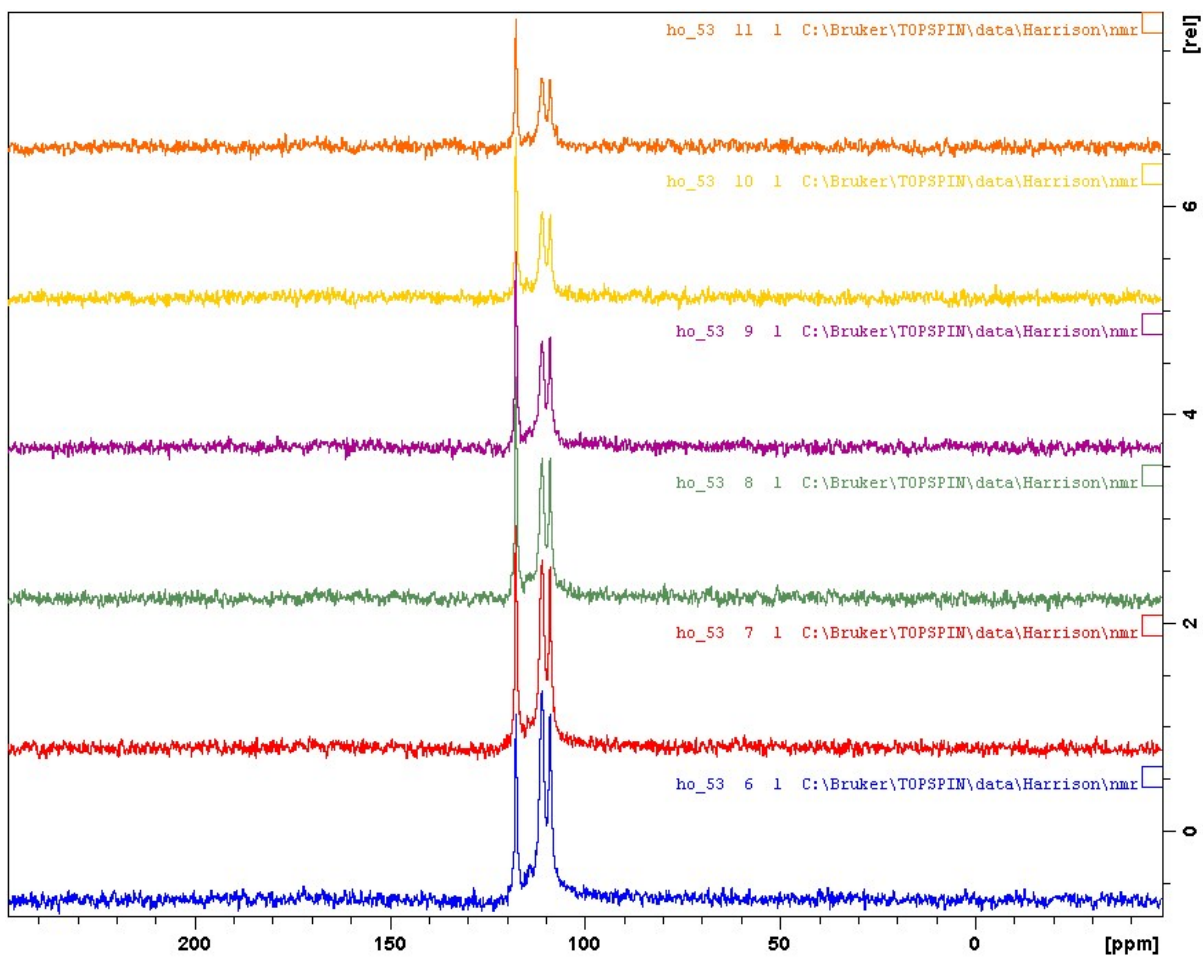

**Figure S80.**  $^{19}\text{F} \rightarrow ^{13}\text{C}$  CP/MAS NMR spectrum of **8** with a contact times 1, 2, 4, 6, 8, 10 ms (bottom to top).

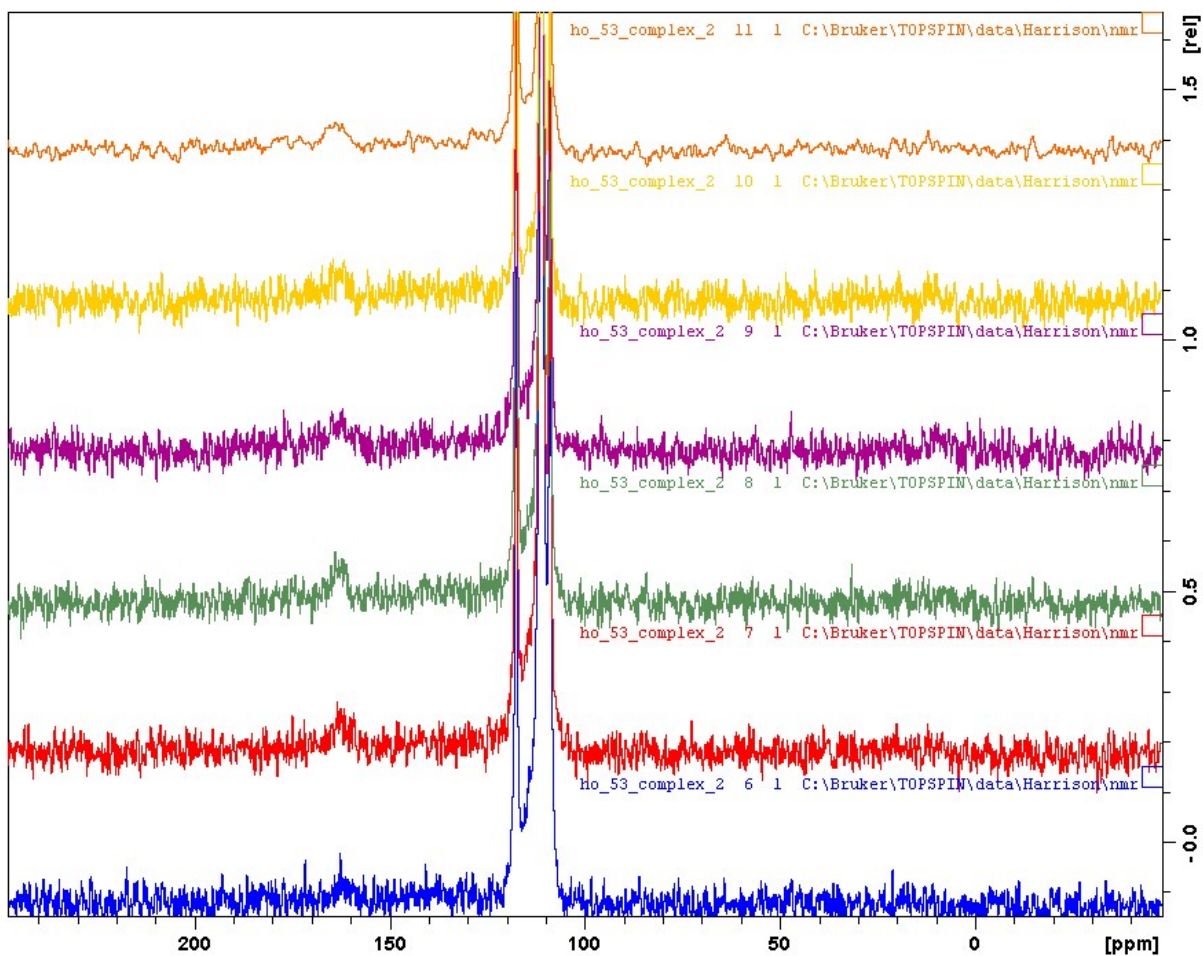

**Figure S81.**  $^{19}\text{F} \rightarrow ^{13}\text{C}$  CP/MAS NMR spectrum of 8:2PFOA with a contact times 1, 2, 4, 6, 8, 10 ms (bottom to top).

**Table S1.** Partition coefficient of PFOA in water:solvent measured by  $^{19}\text{F}$  NMR spectroscopy.

| Solvent               | FC-72 | 1,3-<br>Bis(trifluoromethyl)benzene | Chloroform | DCM   | Toluene |
|-----------------------|-------|-------------------------------------|------------|-------|---------|
| Partition coefficient | 96:4  | 31:69                               | 53:47      | 68:32 | 85:16   |

## Computational Chemistry

**Table S2.** Coordinates for host **5**.

|   |           |           |           |
|---|-----------|-----------|-----------|
| C | 1.193200  | 3.020900  | 0.591200  |
| C | 2.659700  | 2.715200  | 0.231200  |
| H | 3.134800  | 3.621700  | -0.121000 |
| H | 3.184700  | 2.391900  | 1.137900  |
| C | 0.376000  | 3.919600  | -0.139300 |
| C | 0.863800  | 5.377400  | -0.414500 |
| C | -0.265400 | 6.437700  | -0.242600 |
| H | 0.146700  | 7.452300  | -0.169200 |
| H | -0.845500 | 6.257400  | 0.669900  |
| H | -0.955800 | 6.498200  | -1.081500 |
| C | 1.457400  | 5.469500  | -1.816800 |
| H | 1.722200  | 6.499800  | -2.077900 |
| H | 0.760500  | 5.095600  | -2.567800 |
| H | 2.360000  | 4.863500  | -1.902300 |
| C | 1.924800  | 5.868300  | 0.619700  |
| H | 2.121700  | 6.942200  | 0.507200  |
| H | 2.904000  | 5.403800  | 0.514500  |
| H | 1.580300  | 5.704900  | 1.647800  |
| C | -0.973100 | 3.514800  | -0.347900 |
| C | -1.554700 | 2.601200  | 0.564400  |
| H | -2.607200 | 2.354400  | 0.450500  |
| C | -0.793500 | 1.995900  | 1.558400  |
| O | -1.234500 | 1.107200  | 2.496200  |
| C | -2.619200 | 1.088900  | 2.793600  |
| H | -2.715600 | 0.757400  | 3.834200  |
| H | -3.064200 | 2.090200  | 2.744800  |
| C | 0.584200  | 2.173600  | 1.534600  |
| H | 1.197900  | 1.562700  | 2.195700  |
| C | 2.630900  | -0.142900 | -2.991300 |
| H | 2.494100  | -0.827100 | -3.823500 |
| C | 3.491200  | 0.972200  | -3.109400 |
| C | 4.077900  | 1.277100  | -4.494600 |
| H | 4.873900  | 0.552800  | -4.707900 |
| H | 4.544100  | 2.246800  | -4.428500 |

|   |           |           |           |
|---|-----------|-----------|-----------|
| C | 3.790900  | 1.736500  | -1.930800 |
| C | 5.200900  | 2.402800  | -1.709100 |
| C | 6.340000  | 1.633100  | -2.443000 |
| H | 7.330200  | 1.948100  | -2.090200 |
| H | 6.364200  | 1.819800  | -3.517800 |
| H | 6.264500  | 0.552300  | -2.277000 |
| C | 5.656700  | 2.345700  | -0.219000 |
| H | 6.724900  | 2.575500  | -0.115500 |
| H | 5.496000  | 1.352000  | 0.214400  |
| H | 5.158600  | 3.089300  | 0.406100  |
| C | 5.252200  | 3.873000  | -2.149900 |
| H | 6.235400  | 4.310300  | -1.937700 |
| H | 4.513300  | 4.484400  | -1.628400 |
| H | 5.085600  | 3.988300  | -3.221200 |
| C | 2.844100  | 1.652100  | -0.865000 |
| C | 2.016900  | 0.513300  | -0.794400 |
| H | 1.436400  | 0.354000  | 0.101800  |
| C | 1.944400  | -0.413900 | -1.816300 |
| O | 1.239700  | -1.585200 | -1.765200 |
| C | 0.169800  | -1.658000 | -0.832500 |
| H | -0.491100 | -2.458800 | -1.184800 |
| H | -0.429000 | -0.738900 | -0.848500 |
| C | 0.901500  | 0.991000  | -7.368500 |
| H | -0.010700 | 0.825900  | -7.940700 |
| C | 1.807500  | -0.054900 | -7.246600 |
| O | 1.480900  | -1.178000 | -7.950700 |
| C | 2.494000  | -2.151900 | -8.145900 |
| H | 2.284800  | -2.639700 | -9.105100 |
| H | 3.491900  | -1.705500 | -8.232300 |
| C | 2.848800  | 0.076400  | -6.334200 |
| H | 3.473900  | -0.777800 | -6.087300 |
| C | 3.094300  | 1.305500  | -5.676200 |
| C | 2.345900  | 2.449800  | -6.072100 |
| C | 2.973600  | 3.878000  | -6.142700 |
| C | 4.504100  | 3.853800  | -6.435300 |
| H | 4.866900  | 4.840400  | -6.751000 |
| H | 4.744600  | 3.148500  | -7.239300 |
| H | 5.122400  | 3.613900  | -5.572500 |
| C | 2.701400  | 4.628900  | -4.842900 |
| H | 3.212500  | 5.597500  | -4.819900 |
| H | 3.025200  | 4.051400  | -3.976400 |
| H | 1.634800  | 4.814400  | -4.711200 |
| C | 2.431500  | 4.720700  | -7.339400 |
| H | 3.006400  | 5.647300  | -7.465000 |
| H | 1.402400  | 5.056900  | -7.223300 |
| H | 2.501800  | 4.162400  | -8.280500 |
| C | 1.084700  | 2.196800  | -6.667300 |
| C | -0.179800 | 3.024000  | -6.367000 |
| H | -0.859200 | 2.951600  | -7.224600 |
| H | 0.095900  | 4.064300  | -6.250300 |
| C | -1.798700 | 1.615600  | -2.631800 |
| H | -2.088300 | 1.205700  | -1.668500 |
| C | -1.559100 | 0.722900  | -3.666300 |
| O | -1.824900 | -0.595600 | -3.419400 |
| C | -1.210100 | -1.558100 | -4.264900 |
| H | -1.215900 | -2.500100 | -3.703500 |
| H | -0.154100 | -1.315100 | -4.438000 |
| C | -1.073500 | 1.225700  | -4.857900 |
| H | -0.813200 | 0.539900  | -5.650300 |
| C | -0.931800 | 2.608000  | -5.091600 |

|   |           |            |           |
|---|-----------|------------|-----------|
| C | -1.499000 | 3.516300   | -4.146500 |
| C | -2.127500 | 4.882600   | -4.614100 |
| C | -2.623900 | 4.832100   | -6.091400 |
| H | -3.279100 | 5.680700   | -6.325700 |
| H | -3.193700 | 3.918100   | -6.294600 |
| H | -1.810300 | 4.910400   | -6.815200 |
| C | -1.158000 | 6.067500   | -4.493500 |
| H | -1.618900 | 6.989300   | -4.869300 |
| H | -0.244300 | 5.911100   | -5.070000 |
| H | -0.871900 | 6.262200   | -3.459500 |
| C | -3.427700 | 5.234400   | -3.830000 |
| H | -3.985000 | 6.043800   | -4.318500 |
| H | -3.236500 | 5.607600   | -2.822500 |
| H | -4.100100 | 4.371500   | -3.762100 |
| C | -1.689900 | 3.012100   | -2.815300 |
| C | -1.816500 | 3.905500   | -1.573600 |
| H | -2.872600 | 3.955000   | -1.280600 |
| H | -1.526200 | 4.899400   | -1.873800 |
| C | 0.506600  | -2.010900  | 0.622800  |
| O | -0.217500 | -1.660100  | 1.554900  |
| N | 1.623600  | -2.800800  | 0.782900  |
| C | 2.050600  | -3.291900  | 2.082800  |
| H | 3.018100  | -3.778800  | 1.925400  |
| C | 1.021600  | -4.234600  | 2.718300  |
| C | 1.686200  | -5.468000  | 3.314400  |
| F | 2.413200  | -6.054900  | 2.318900  |
| C | 0.682800  | -6.481200  | 3.855300  |
| F | -0.225300 | -6.750600  | 2.865700  |
| F | -0.019500 | -5.941100  | 4.884800  |
| C | 1.353300  | -7.782200  | 4.279700  |
| F | 2.092900  | -8.265900  | 3.237600  |
| C | 0.335800  | -8.844700  | 4.658200  |
| F | -0.466900 | -9.080700  | 3.576500  |
| F | -0.479600 | -8.387300  | 5.642700  |
| C | 0.966500  | -10.159400 | 5.076200  |
| F | 1.805600  | -10.615200 | 4.100000  |
| C | -0.109500 | -11.200000 | 5.323900  |
| F | -0.806600 | -11.464900 | 4.186600  |
| F | -1.008600 | -10.799900 | 6.251400  |
| F | 0.421800  | -12.370700 | 5.749500  |
| F | 1.727600  | -9.991900  | 6.190100  |
| F | 2.216000  | -7.558200  | 5.300900  |
| F | 2.565000  | -5.094800  | 4.276400  |
| H | 0.296000  | -4.555800  | 1.961100  |
| H | 0.469600  | -3.694200  | 3.496000  |
| H | 2.213600  | -2.424900  | 2.732900  |
| H | 2.178700  | -3.025700  | -0.038800 |
| C | -3.437500 | 0.113000   | 1.957100  |
| O | -4.622000 | 0.322300   | 1.703000  |
| N | -2.767400 | -1.028100  | 1.576200  |
| C | -3.408800 | -2.096100  | 0.836000  |
| H | -2.616000 | -2.688600  | 0.368600  |
| H | -4.008400 | -1.643500  | 0.038200  |
| C | -4.279200 | -2.977200  | 1.730400  |
| C | -4.941800 | -4.080200  | 0.915000  |
| F | -5.604600 | -3.513100  | -0.127800 |
| C | -5.899800 | -4.941900  | 1.727500  |
| F | -6.836000 | -4.158600  | 2.327600  |
| F | -5.204300 | -5.519600  | 2.745700  |
| C | -6.578400 | -6.003400  | 0.873400  |

|   |            |            |           |
|---|------------|------------|-----------|
| F | -7.326100  | -5.418300  | -0.100800 |
| C | -7.446300  | -6.947400  | 1.682400  |
| F | -8.461500  | -6.263600  | 2.273100  |
| F | -6.709800  | -7.468000  | 2.702800  |
| C | -7.994700  | -8.080700  | 0.846300  |
| F | -8.844900  | -7.596000  | -0.101500 |
| C | -8.710400  | -9.092700  | 1.710400  |
| F | -9.729700  | -8.535600  | 2.404500  |
| F | -7.878900  | -9.670600  | 2.609100  |
| F | -9.243500  | -10.089700 | 0.962600  |
| F | -6.988200  | -8.710000  | 0.167400  |
| F | -5.620300  | -6.725300  | 0.216700  |
| F | -3.968800  | -4.861400  | 0.361300  |
| H | -5.046200  | -2.361000  | 2.213400  |
| H | -3.660100  | -3.413800  | 2.523000  |
| H | -1.766100  | -1.130200  | 1.805300  |
| C | -1.877200  | -1.884100  | -5.611600 |
| O | -1.292500  | -2.553500  | -6.465200 |
| N | -3.172600  | -1.424300  | -5.735200 |
| C | -3.999900  | -1.653800  | -6.912200 |
| H | -4.910200  | -1.064300  | -6.765600 |
| C | -4.309400  | -3.137100  | -7.100800 |
| H | -3.521000  | -3.595900  | -7.709400 |
| C | -5.676300  | -3.392900  | -7.736800 |
| F | -5.724000  | -2.849200  | -8.975200 |
| F | -6.611300  | -2.754200  | -6.986700 |
| C | -5.976600  | -4.885700  | -7.779800 |
| F | -5.086800  | -5.495600  | -8.617300 |
| C | -7.406000  | -5.272800  | -8.146700 |
| F | -7.709400  | -4.855800  | -9.400300 |
| F | -8.286800  | -4.663200  | -7.309400 |
| C | -7.550400  | -6.782800  | -8.023200 |
| F | -6.620400  | -7.392400  | -8.816500 |
| C | -8.902600  | -7.355300  | -8.325700 |
| F | -9.258700  | -7.079200  | -9.609000 |
| F | -9.851400  | -6.784100  | -7.535700 |
| C | -8.877600  | -8.858600  | -8.098600 |
| F | -7.941400  | -9.477600  | -8.861400 |
| F | -10.073600 | -9.421200  | -8.396300 |
| F | -8.587200  | -9.181400  | -6.812200 |
| F | -7.221500  | -7.151000  | -6.744800 |
| F | -5.694200  | -5.397700  | -6.537500 |
| H | -4.284100  | -3.623300  | -6.117200 |
| H | -3.562500  | -0.885800  | -4.964500 |
| C | 2.501400   | -3.253900  | -7.095400 |
| H | -3.472100  | -1.259600  | -7.787400 |
| O | 3.515300   | -3.895600  | -6.823400 |
| N | 1.273600   | -3.527000  | -6.529100 |
| C | 1.114400   | -4.566300  | -5.540500 |
| H | 0.180600   | -4.359300  | -5.008400 |
| H | 1.936200   | -4.494400  | -4.818500 |
| C | 1.083000   | -5.950000  | -6.182300 |
| C | 0.773400   | -6.994400  | -5.133000 |
| F | 1.726600   | -6.992700  | -4.169100 |
| C | 0.620600   | -8.404500  | -5.677100 |
| F | 1.766900   | -8.870400  | -6.223000 |
| F | -0.308200  | -8.429200  | -6.669400 |
| C | 0.162100   | -9.362300  | -4.602500 |
| F | 1.047100   | -9.508300  | -3.589200 |
| C | -0.139100  | -10.743600 | -5.090600 |

|   |           |            |           |
|---|-----------|------------|-----------|
| F | 0.973200  | -11.298400 | -5.641200 |
| F | -1.070200 | -10.694200 | -6.076500 |
| F | -0.546800 | -11.437600 | -4.035100 |
| F | 0.495600  | -11.789000 | -3.299100 |
| C | -1.147300 | -12.574000 | -4.396900 |
| F | -0.418400 | -13.318600 | -5.264600 |
| F | -2.366300 | -12.374200 | -4.958900 |
| F | -1.355400 | -13.366900 | -3.310000 |
| F | -1.408500 | -10.851500 | -3.232000 |
| F | -0.985000 | -8.928100  | -4.016700 |
| F | -0.387700 | -6.653900  | -4.506000 |
| H | 2.044500  | -6.168800  | -6.660000 |
| H | 0.314300  | -5.964100  | -6.964500 |
| H | 0.448300  | -2.972800  | -6.801100 |

**Table S3.** Coordinates for host:guest complex.

|   |            |           |           |
|---|------------|-----------|-----------|
| C | -8.458200  | -1.055800 | 2.366000  |
| C | -8.741700  | 0.445900  | 2.509600  |
| H | -9.742800  | 0.710200  | 2.159300  |
| H | -8.689300  | 0.706600  | 3.584500  |
| C | -8.942500  | -1.836800 | 1.261900  |
| C | -10.441900 | -1.739900 | 0.828800  |
| C | -10.979900 | -3.087700 | 0.259600  |
| H | -12.084900 | -3.082600 | 0.312200  |
| H | -10.607400 | -3.950200 | 0.842200  |
| H | -10.725300 | -3.245800 | -0.801100 |
| C | -10.720400 | -0.642500 | -0.203500 |
| H | -11.802900 | -0.585100 | -0.433500 |
| H | -10.182600 | -0.867400 | -1.134800 |
| H | -10.389100 | 0.344800  | 0.145900  |
| C | -11.304900 | -1.507600 | 2.107300  |
| H | -12.374600 | -1.508800 | 1.822300  |
| H | -11.102600 | -0.553900 | 2.618900  |
| H | -11.138000 | -2.322500 | 2.836300  |
| C | -8.056400  | -2.854700 | 0.800900  |
| C | -7.076600  | -3.387100 | 1.670400  |
| H | -6.471700  | -4.228500 | 1.316800  |
| C | -6.890900  | -2.843700 | 2.952400  |
| O | -6.095800  | -3.383600 | 3.924100  |
| C | -5.539500  | -4.669400 | 3.676100  |
| H | -5.192500  | -5.036800 | 4.660600  |
| H | -6.295200  | -5.374400 | 3.278800  |
| C | -7.507000  | -1.609500 | 3.239700  |
| H | -7.197500  | -1.066300 | 4.140800  |
| C | -5.649600  | 2.345200  | 0.095400  |
| H | -4.875300  | 2.688100  | -0.599300 |
| C | -6.943800  | 2.908700  | 0.036000  |
| C | -7.131700  | 3.920800  | -1.124500 |
| H | -6.561000  | 4.841000  | -0.895400 |
| H | -8.172000  | 4.211900  | -1.194100 |
| C | -7.967000  | 2.502100  | 0.972700  |
| C | -9.190000  | 3.413300  | 1.377100  |
| C | -9.047700  | 4.898000  | 0.924900  |
| H | -9.722600  | 5.519300  | 1.542200  |
| H | -9.349000  | 5.070100  | -0.120700 |
| H | -8.016900  | 5.269400  | 1.063600  |



|   |            |           |           |
|---|------------|-----------|-----------|
| C | -9.231000  | 3.506400  | 2.933400  |
| H | -10.012300 | 4.230200  | 3.233800  |
| H | -8.260100  | 3.861300  | 3.328000  |
| H | -9.477500  | 2.551800  | 3.418300  |
| C | -10.570400 | 2.910100  | 0.880400  |
| H | -11.336800 | 3.686200  | 1.071700  |
| H | -10.901300 | 1.998200  | 1.403900  |
| H | -10.561000 | 2.691700  | -0.199400 |
| C | -7.697500  | 1.297600  | 1.716800  |
| C | -6.392200  | 0.787500  | 1.756600  |
| H | -6.210500  | -0.081200 | 2.384400  |
| C | -5.352400  | 1.342000  | 1.016700  |
| O | -4.041600  | 0.885900  | 1.128400  |
| C | -3.842100  | -0.318100 | 1.871500  |
| H | -2.884800  | -0.741100 | 1.535600  |
| H | -4.614100  | -1.074700 | 1.647900  |
| C | -5.304600  | 1.961800  | -4.483100 |
| H | -4.729200  | 1.361800  | -5.198100 |
| C | -4.733900  | 3.143900  | -3.980100 |
| O | -3.581400  | 3.575800  | -4.575400 |
| C | -3.077100  | 4.845100  | -4.179800 |
| H | -2.370100  | 5.148400  | -4.975400 |
| H | -3.879700  | 5.605200  | -4.112500 |
| C | -5.354100  | 3.760300  | -2.880100 |
| H | -4.856700  | 4.562900  | -2.324900 |
| C | -6.649000  | 3.366700  | -2.470000 |
| C | -7.369200  | 2.393900  | -3.224700 |
| C | -8.920200  | 2.297600  | -3.260700 |
| C | -9.653900  | 3.602400  | -2.833300 |
| H | -10.690800 | 3.572700  | -3.216900 |
| H | -9.158500  | 4.499800  | -3.247700 |
| H | -9.739600  | 3.713700  | -1.743700 |
| C | -9.396600  | 1.161100  | -2.349400 |
| H | -10.496900 | 1.052200  | -2.388900 |
| H | -9.103300  | 1.376700  | -1.308300 |
| H | -8.939500  | 0.195600  | -2.611000 |
| C | -9.400600  | 2.117100  | -4.736600 |
| H | -10.502700 | 2.013000  | -4.745000 |
| H | -8.984300  | 1.249200  | -5.265800 |
| H | -9.136800  | 3.016300  | -5.325300 |
| C | -6.577400  | 1.540600  | -4.065100 |
| C | -6.946200  | 0.088900  | -4.390300 |
| H | -6.470800  | -0.189400 | -5.349900 |
| H | -8.023900  | -0.041800 | -4.516300 |
| C | -5.737300  | -2.189500 | -0.912300 |
| H | -5.462000  | -2.618800 | 0.054700  |
| C | -4.835300  | -1.324500 | -1.542600 |
| O | -3.575100  | -1.193700 | -0.987100 |
| C | -2.803000  | -0.065200 | -1.372900 |
| H | -2.025000  | 0.047500  | -0.600900 |
| H | -3.402200  | 0.862400  | -1.391300 |
| C | -5.265300  | -0.599400 | -2.654700 |
| H | -4.656800  | 0.210800  | -3.059800 |
| C | -6.498300  | -0.884300 | -3.270300 |
| C | -7.294200  | -1.985700 | -2.811200 |
| C | -8.303500  | -2.728400 | -3.767200 |
| C | -7.825700  | -2.641300 | -5.250500 |
| H | -8.381800  | -3.383500 | -5.852600 |
| H | -6.746600  | -2.869900 | -5.331100 |
| H | -8.011200  | -1.663500 | -5.716700 |

|   |            |           |           |
|---|------------|-----------|-----------|
| C | -9.755300  | -2.203000 | -3.695000 |
| H | -10.401900 | -2.797400 | -4.370000 |
| H | -9.824800  | -1.145600 | -4.004100 |
| H | -10.164900 | -2.285100 | -2.673400 |
| C | -8.319100  | -4.262600 | -3.475000 |
| H | -8.788600  | -4.788000 | -4.327200 |
| H | -8.899900  | -4.539500 | -2.583500 |
| H | -7.290800  | -4.651100 | -3.354100 |
| C | -6.980800  | -2.489900 | -1.498800 |
| C | -7.996600  | -3.309900 | -0.657700 |
| H | -7.739900  | -4.385700 | -0.697800 |
| H | -8.971100  | -3.187300 | -1.130500 |
| C | -3.744900  | -0.112800 | 3.389300  |
| O | -3.700500  | -1.080400 | 4.154700  |
| N | -3.662400  | 1.171700  | 3.819700  |
| C | -3.386900  | 1.500100  | 5.212300  |
| H | -3.640700  | 2.561400  | 5.377100  |
| C | -1.929100  | 1.214900  | 5.630400  |
| C | -0.928100  | 2.247100  | 5.117700  |
| F | -1.073700  | 2.435500  | 3.762600  |
| C | 0.555500   | 1.811600  | 5.419200  |
| F | 0.764200   | 0.605500  | 4.831900  |
| F | 0.653200   | 1.661600  | 6.766100  |
| C | 1.700000   | 2.793200  | 4.943900  |
| F | 1.473400   | 3.164900  | 3.664400  |
| C | 3.141400   | 2.126200  | 5.010200  |
| F | 3.258100   | 1.264600  | 3.974100  |
| F | 3.267300   | 1.438200  | 6.168700  |
| C | 4.325200   | 3.165900  | 4.933700  |
| F | 4.075400   | 4.064900  | 3.957300  |
| C | 5.729800   | 2.508500  | 4.640100  |
| F | 5.775700   | 1.999500  | 3.403400  |
| F | 5.976900   | 1.531200  | 5.526700  |
| F | 6.677900   | 3.449600  | 4.757200  |
| F | 4.414800   | 3.810600  | 6.119200  |
| F | 1.676000   | 3.890400  | 5.734400  |
| F | -1.141600  | 3.462900  | 5.702600  |
| H | -1.639700  | 0.215300  | 5.267400  |
| H | -1.849800  | 1.212900  | 6.731200  |
| H | -4.042400  | 0.879200  | 5.848100  |
| H | -3.658700  | 1.913100  | 3.125900  |
| C | -4.337100  | -4.684100 | 2.705700  |
| O | -4.151400  | -5.642800 | 1.956300  |
| N | -3.512200  | -3.607700 | 2.800400  |
| C | -2.266900  | -3.528800 | 2.053400  |
| H | -1.819400  | -2.543900 | 2.260400  |
| H | -2.463200  | -3.606100 | 0.967400  |
| C | -1.279900  | -4.640400 | 2.473600  |
| C | 0.092900   | -4.452700 | 1.849100  |
| F | -0.006700  | -4.366500 | 0.484500  |
| C | 1.071100   | -5.643700 | 2.189200  |
| F | 0.565900   | -6.761000 | 1.607700  |
| F | 1.071500   | -5.819300 | 3.537300  |
| C | 2.570000   | -5.441200 | 1.728900  |
| F | 2.583900   | -5.118500 | 0.414800  |
| C | 3.500300   | -6.706400 | 1.925600  |
| F | 3.008700   | -7.736700 | 1.200100  |
| F | 3.499200   | -7.044700 | 3.236600  |
| C | 4.997000   | -6.475800 | 1.466300  |
| F | 5.017500   | -6.297000 | 0.126800  |

|   |           |           |           |
|---|-----------|-----------|-----------|
| C | 5.972000  | -7.671600 | 1.796100  |
| F | 5.520200  | -8.819200 | 1.271300  |
| F | 6.114700  | -7.820100 | 3.119900  |
| F | 7.171800  | -7.394900 | 1.262600  |
| F | 5.506100  | -5.379900 | 2.074100  |
| F | 3.091000  | -4.426100 | 2.455300  |
| F | 0.655800  | -3.286800 | 2.292500  |
| H | -1.681000 | -5.621600 | 2.171900  |
| H | -1.151400 | -4.634600 | 3.569500  |
| H | -3.736400 | -2.821700 | 3.429500  |
| C | -2.056500 | -0.180300 | -2.705700 |
| O | -1.640200 | 0.831500  | -3.278300 |
| N | -1.809400 | -1.436900 | -3.151300 |
| C | -0.931500 | -1.662300 | -4.293700 |
| H | -1.066300 | -2.696900 | -4.650500 |
| C | 0.537400  | -1.386700 | -3.909400 |
| H | 0.589300  | -0.416700 | -3.392700 |
| C | 1.455000  | -1.300600 | -5.121800 |
| F | 1.030400  | -0.313200 | -5.968400 |
| F | 1.434300  | -2.476100 | -5.821400 |
| C | 2.946100  | -0.992900 | -4.709500 |
| F | 2.934400  | 0.039000  | -3.824700 |
| C | 3.915200  | -0.613000 | -5.896800 |
| F | 3.547700  | 0.591700  | -6.392100 |
| F | 3.792700  | -1.551400 | -6.863200 |
| C | 5.441000  | -0.526100 | -5.477400 |
| F | 5.559000  | 0.242600  | -4.371400 |
| C | 6.366200  | 0.104500  | -6.594000 |
| F | 6.138400  | 1.435600  | -6.647900 |
| F | 6.079200  | -0.444300 | -7.797500 |
| C | 7.908900  | -0.106800 | -6.335700 |
| F | 8.235300  | 0.271800  | -5.090800 |
| F | 8.598300  | 0.640200  | -7.211300 |
| F | 8.249500  | -1.390600 | -6.508200 |
| F | 5.887100  | -1.773500 | -5.199600 |
| F | 3.433900  | -2.097700 | -4.090700 |
| H | 0.923900  | -2.163300 | -3.229700 |
| H | -2.139200 | -2.218600 | -2.589100 |
| C | -2.309300 | 4.848100  | -2.843900 |
| H | -1.227500 | -0.968400 | -5.099700 |
| O | -2.218900 | 5.879600  | -2.179400 |
| N | -1.710200 | 3.670700  | -2.527700 |
| C | -0.804400 | 3.548200  | -1.400000 |
| H | -0.482900 | 2.496900  | -1.355600 |
| H | -1.322400 | 3.794300  | -0.453600 |
| C | 0.419600  | 4.480500  | -1.546400 |
| C | 1.534200  | 4.097200  | -0.591100 |
| F | 1.077700  | 4.044400  | 0.700900  |
| C | 2.753000  | 5.086100  | -0.634000 |
| F | 2.288600  | 6.355100  | -0.503500 |
| F | 3.339700  | 4.967900  | -1.854200 |
| C | 3.830500  | 4.848900  | 0.503200  |
| F | 3.328400  | 5.354500  | 1.652800  |
| C | 5.219200  | 5.544600  | 0.197600  |
| F | 4.993600  | 6.811400  | -0.222800 |
| F | 5.837800  | 4.851500  | -0.787500 |
| C | 6.191000  | 5.605300  | 1.438600  |
| F | 5.685600  | 6.455400  | 2.359300  |
| C | 7.652400  | 6.093900  | 1.099700  |
| F | 7.621300  | 7.275400  | 0.466000  |

|   |           |           |           |
|---|-----------|-----------|-----------|
| F | 8.292200  | 5.201000  | 0.334000  |
| F | 8.330300  | 6.236500  | 2.249200  |
| F | 6.299100  | 4.368900  | 1.978100  |
| F | 4.051700  | 3.524000  | 0.663500  |
| F | 2.009600  | 2.858200  | -0.920200 |
| H | 0.113600  | 5.523400  | -1.370300 |
| H | 0.831800  | 4.407100  | -2.568300 |
| H | -1.852900 | 2.832000  | -3.099200 |
| C | -0.305600 | 0.375700  | 1.814700  |
| C | 1.199800  | 0.148400  | 1.458100  |
| F | 1.862700  | 1.325200  | 1.411400  |
| C | 1.337500  | -0.579000 | 0.063600  |
| F | 1.104100  | 0.301200  | -0.933400 |
| F | 0.361800  | -1.533100 | -0.006100 |
| C | 2.707200  | -1.327600 | -0.206000 |
| F | 2.813200  | -2.327300 | 0.687400  |
| C | 4.012100  | -0.451600 | -0.143000 |
| F | 4.222700  | -0.081400 | 1.139900  |
| F | 3.832200  | 0.655000  | -0.897100 |
| C | 5.340300  | -1.144600 | -0.683800 |
| F | 5.233300  | -1.303200 | -2.018600 |
| C | 5.718200  | -2.538200 | -0.053100 |
| F | 4.896400  | -3.477400 | -0.576900 |
| F | 5.555300  | -2.492300 | 1.287400  |
| C | 7.202000  | -2.992500 | -0.340800 |
| F | 7.478200  | -2.885400 | -1.649000 |
| F | 7.346600  | -4.273800 | 0.028600  |
| F | 8.067800  | -2.245400 | 0.355200  |
| F | 6.340200  | -0.266100 | -0.426600 |
| F | 2.606600  | -1.866800 | -1.447900 |
| F | 1.738600  | -0.625600 | 2.418000  |
| O | -0.866400 | -0.280700 | 2.654800  |
| O | -0.847900 | 1.329300  | 1.051200  |
| H | -1.801100 | 1.424200  | 1.266700  |

**Table S4.** Table of  $\rho_{\text{bcp}}$  for 5:PFOA

| BCP # | Atom1 | No1 | Atom2 | No2 | Rho   |
|-------|-------|-----|-------|-----|-------|
| 313   | F     | 225 | F     | 233 | 0.009 |
| 314   | F     | 225 | F     | 231 | 0.008 |
| 248   | F     | 166 | F     | 236 | 0.008 |
| 349   | F     | 196 | F     | 250 | 0.007 |
| 241   | F     | 155 | F     | 236 | 0.007 |
| 352   | F     | 187 | F     | 241 | 0.006 |
| 236   | F     | 167 | F     | 236 | 0.006 |
| 363   | F     | 196 | F     | 241 | 0.006 |
| 219   | F     | 167 | F     | 234 | 0.006 |
| 343   | F     | 127 | F     | 251 | 0.006 |
| 223   | F     | 150 | F     | 234 | 0.006 |
| 370   | F     | 160 | F     | 243 | 0.006 |
| 344   | F     | 167 | F     | 251 | 0.006 |
| 317   | F     | 208 | F     | 231 | 0.005 |
| 191   | F     | 127 | F     | 231 | 0.005 |
| 346   | F     | 225 | F     | 239 | 0.005 |

|     |   |     |   |     |       |
|-----|---|-----|---|-----|-------|
| 199 | F | 125 | F | 231 | 0.005 |
| 372 | F | 165 | F | 247 | 0.005 |
| 374 | F | 165 | F | 244 | 0.004 |
| 285 | F | 182 | F | 250 | 0.004 |
| 237 | F | 155 | F | 243 | 0.004 |
| 371 | F | 160 | F | 247 | 0.003 |
| 275 | F | 182 | F | 239 | 0.003 |
| 358 | F | 224 | F | 239 | 0.002 |
| 378 | F | 166 | F | 244 | 0.001 |
| 192 | F | 127 | F | 238 | 0.001 |
| 357 | F | 132 | F | 238 | 0.001 |
| 202 | F | 122 | O | 252 | 0.008 |
| 167 | F | 120 | O | 252 | 0.008 |
| 387 | F | 208 | O | 253 | 0.002 |
| 384 | F | 167 | O | 252 | 0.002 |
| 291 | H | 197 | F | 250 | 0.008 |
| 261 | H | 177 | F | 233 | 0.005 |
| 307 | H | 204 | F | 233 | 0.004 |
| 125 | H | 90  | F | 234 | 0.003 |
| 157 | H | 55  | O | 252 | 0.013 |
| 74  | H | 90  | O | 253 | 0.011 |
| 213 | H | 146 | O | 252 | 0.008 |
| 296 | H | 204 | O | 253 | 0.006 |
| 200 | H | 138 | O | 252 | 0.005 |
| 58  | O | 53  | H | 254 | 0.011 |

**Table S5.** Table of  $\rho_{\text{bcp}}$  for 5:octanoic acid

| BCP | Atom1 | No1 | Atom2 | No2 | Rho   |
|-----|-------|-----|-------|-----|-------|
| 314 | F     | 225 | H     | 242 | 0.010 |
| 278 | F     | 182 | H     | 245 | 0.009 |
| 245 | F     | 167 | H     | 243 | 0.009 |
| 235 | F     | 155 | H     | 243 | 0.008 |
| 237 | F     | 155 | H     | 245 | 0.007 |
| 344 | F     | 224 | H     | 246 | 0.007 |
| 343 | F     | 224 | H     | 247 | 0.007 |
| 350 | F     | 166 | H     | 244 | 0.007 |
| 194 | F     | 225 | H     | 240 | 0.007 |
| 222 | F     | 150 | H     | 243 | 0.006 |
| 330 | F     | 225 | H     | 247 | 0.006 |
| 354 | F     | 187 | H     | 249 | 0.006 |
| 200 | F     | 125 | H     | 240 | 0.005 |
| 199 | F     | 127 | H     | 240 | 0.004 |
| 353 | F     | 160 | H     | 253 | 0.004 |
| 358 | F     | 216 | H     | 248 | 0.003 |

|     |   |     |   |     |       |
|-----|---|-----|---|-----|-------|
| 276 | F | 160 | H | 245 | 0.003 |
| 366 | F | 192 | H | 251 | 0.003 |
| 195 | F | 127 | H | 246 | 0.002 |
| 365 | F | 187 | H | 251 | 0.002 |
| 349 | F | 224 | H | 240 | 0.002 |
| 376 | F | 216 | H | 247 | 0.002 |
| 359 | F | 223 | H | 248 | 0.002 |
| 356 | F | 132 | H | 254 | 0.001 |
| 357 | F | 132 | H | 246 | 0.001 |
| 380 | F | 164 | H | 251 | 0.000 |
| 347 | F | 122 | O | 237 | 0.008 |
| 169 | F | 120 | O | 237 | 0.008 |
| 309 | F | 225 | O | 238 | 0.006 |
| 348 | F | 167 | O | 237 | 0.006 |
| 264 | H | 177 | H | 242 | 0.002 |
| 158 | H | 55  | O | 237 | 0.013 |
| 302 | H | 204 | O | 238 | 0.010 |
| 74  | H | 90  | O | 238 | 0.010 |
| 214 | H | 146 | O | 237 | 0.010 |
| 202 | H | 138 | O | 237 | 0.006 |
| 70  | O | 53  | H | 239 | 0.007 |
